# Supplementary material for: Synthesis of Carvone-Derived 1,2,3-Triazoles Study of Their Antioxidant Properties and Interaction with Bovine Serum Albumin
Source: PubMed Central journal article supplement (PMC6278498; doi:10.3390/molecules23112991), 2018-11-16

## ***Supplementary Materials***

# **Synthesis of Carvone derived 1,2,3-Triazoles. Study of their Antioxidant Properties and Interaction with Bovine Serum Albumin**

Armen S. Galstyan<sup>1\*</sup>, Armen I. Martiryan<sup>1</sup>, Karine R. Grigoryan<sup>1</sup>, Armine G. Ghazaryan<sup>1</sup>, Melanya A. Samvelyan<sup>1</sup>, Taniel V. Ghochikyan<sup>1</sup> and Valentine G. Nenajdenko<sup>2\*</sup>

### ***1. Fluorescence Spectroscopy Studies***

BSA purchased from the Sigma Chemical. Co. USA was used without further purification. The concentration of BSA (0.4 mg/ml) was determined spectrophotometrically using a molar extinction coefficient  $39080\text{M}^{-1}\text{ cm}^{-1}$  at 280 nm. The concentration of **4e** was varied in the range of  $4.00 \times 10^{-5}$  -  $2.00 \times 10^{-4}\text{M}$ . The protein solutions were prepared in saline solution. The fluorescence spectra were recorded on a Cary Eclipse (Varian) spectrofluorometer at 298 and 308K, in the range  $\lambda = 300\text{-}500$  nm at the excitation wavelength  $\lambda = 280$  nm. The temperature of the samples was maintained constant by circulating the thermostated water connected to the spectrophotometer of the LAUDA Alpha 100 thermostat (Germany).  $l = 1$  cm cuvettes were used. The graphs were constructed and analyzed using the ORIGIN 8.0 software.

#### ***1.1. Determination of the thermodynamic binding parameters of BSA - 4e***

The character of intermolecular interactions between the biomolecule and the ligand was determined by the relationship of thermodynamic parameters ( $\Delta H$ ,  $\Delta S$  and  $\Delta G$ ).  $\Delta G$  shows the possibility of spontaneous rate of the reaction, and  $\Delta H$  and  $\Delta S$  are the main criteria for confirming the character of interactions. The thermodynamic parameters of binding with BSA are determined by the following equations:

$$\Delta G = -RT \ln K_b \quad (1),$$

$$\ln \frac{K_{b_1}}{K_{b_2}} = \left( \frac{1}{T_1} - \frac{1}{T_2} \right) \frac{\Delta H}{R} \quad (2),$$

$$\Delta G = \Delta H - T\Delta S \quad (3),$$

where  $K_{b_1}$  and  $K_{b_2}$  are the binding constants at temperatures of 298 and 303K, and  $R$  is the gas constant. The obtained results are presented in Table 4.

The binding constant and the number of binding sites ( $n$ ) with BSA were determined based on the data of quenching of BSA fluorescence according to the well-known [Lakowicz, J. *Principles of Fluorescence Spectroscopy*, 3rd ed., New York: Springer, 2006, 529.] equation:

$$\lg[(F_0 - F) / F] = \lg K_b + n \lg[Q] \quad (4),$$

where  $F_0$  and  $F$  are the fluorescence intensities of BSA in the absence and presence of **4e**, respectively;  $K_b$  is the binding constant,  $n$  – is the number of binding sites.  $[Q]$  is the concentration of quencher-**4e**.  $K_b$  and  $n$  are determined from the dependence  $\lg(F_0 - F) / F$  vs  $\lg[Q]$ . Figure 7 shows a plot of  $\log (F_0 - F) / F$  vs  $\log [Q]$  at two different temperatures.

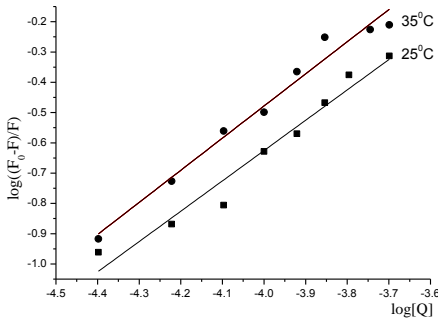

Figure 7. The plot of  $\log (F_0 - F) / F$  versus  $\log [Q]$  at two different temperatures.

### 1.2. Determination of the distance between the protein and ligand - **4e**

The distance between the protein and the ligand can be calculated using the theory of resonance energy transfer (Foerster theory) [Lakowicz, J. *Principles of Fluorescence Spectroscopy*, 3rd ed., New York: Springer, 2006, 529.]. The efficiency of energy transfer  $E$  is calculated using the equation:

$$E = 1 - \frac{F}{F_0} = \frac{R_0^6}{R_0^6 + r^6} \quad (5),$$

where  $E$  is the energy transfer efficiency,  $F_0$  and  $F$  are the fluorescence intensities of BSA in the absence and presence of **4e**, respectively;  $r$  is the distance between the donor and the acceptor,  $R_0$  is the Foerster radius, when the energy transfer efficiency is 50% and can be calculated by the following equation:

$$R_0^6 = 8.79 \times 10^{-25} \kappa^2 n^{-4} \Phi J \quad (6),$$

where  $\kappa^2$  - is the spatial orientation factor ( $\kappa^2 = 2/3$ );  $n$  - is the refractive index (1.336);  $\Phi$  is the fluorescence quantum yield of the donor,  $J$  is the overlap integral of the donor fluorescence spectrum and the acceptor absorption spectrum.

$$J = \frac{\sum F(\lambda) \varepsilon(\lambda) \lambda^4 \Delta\lambda}{\sum F(\lambda) \Delta\lambda} \quad (7)$$

where  $F(\lambda)$  is the fluorescence intensity of the donor at wavelength  $\lambda$ ,  $\varepsilon(\lambda)$  is the molar extinction coefficient of acceptor at wavelength  $\lambda$ . Using equations (5) - (7), the overlap integral, the energy transfer efficiency, the Foerster radius, and the distance between the donor and the acceptor were calculated and given in Table.

**Table.** The values of the overlap integral, the energy transfer efficiency, the Foerster radius and the distance between the BSA and **4e**.

| T,<br>K | $I$ ,<br>$\text{cm}^3\text{l} \cdot \text{mol}^{-1}$ | $E$   | $R_0$ ,<br>nm | $r$ , nm |
|---------|------------------------------------------------------|-------|---------------|----------|
| 298     | $1.79 \times 10^{-14}$                               | 0.019 | 3.778         | 7.27     |
| 308     | $1.80 \times 10^{-14}$                               | 0.043 | 3.782         | 7.06     |

## 2. NMR Spectrum of Compounds **3a-i**, **10-N<sub>3</sub>-Car.** and **4a-i**

Molecular Formula: C<sub>7</sub>H<sub>11</sub>NO

<sup>13</sup>C NMR (75 MHz, DMSO/CCl<sub>4</sub> - 1/3)

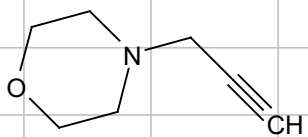

**3a**

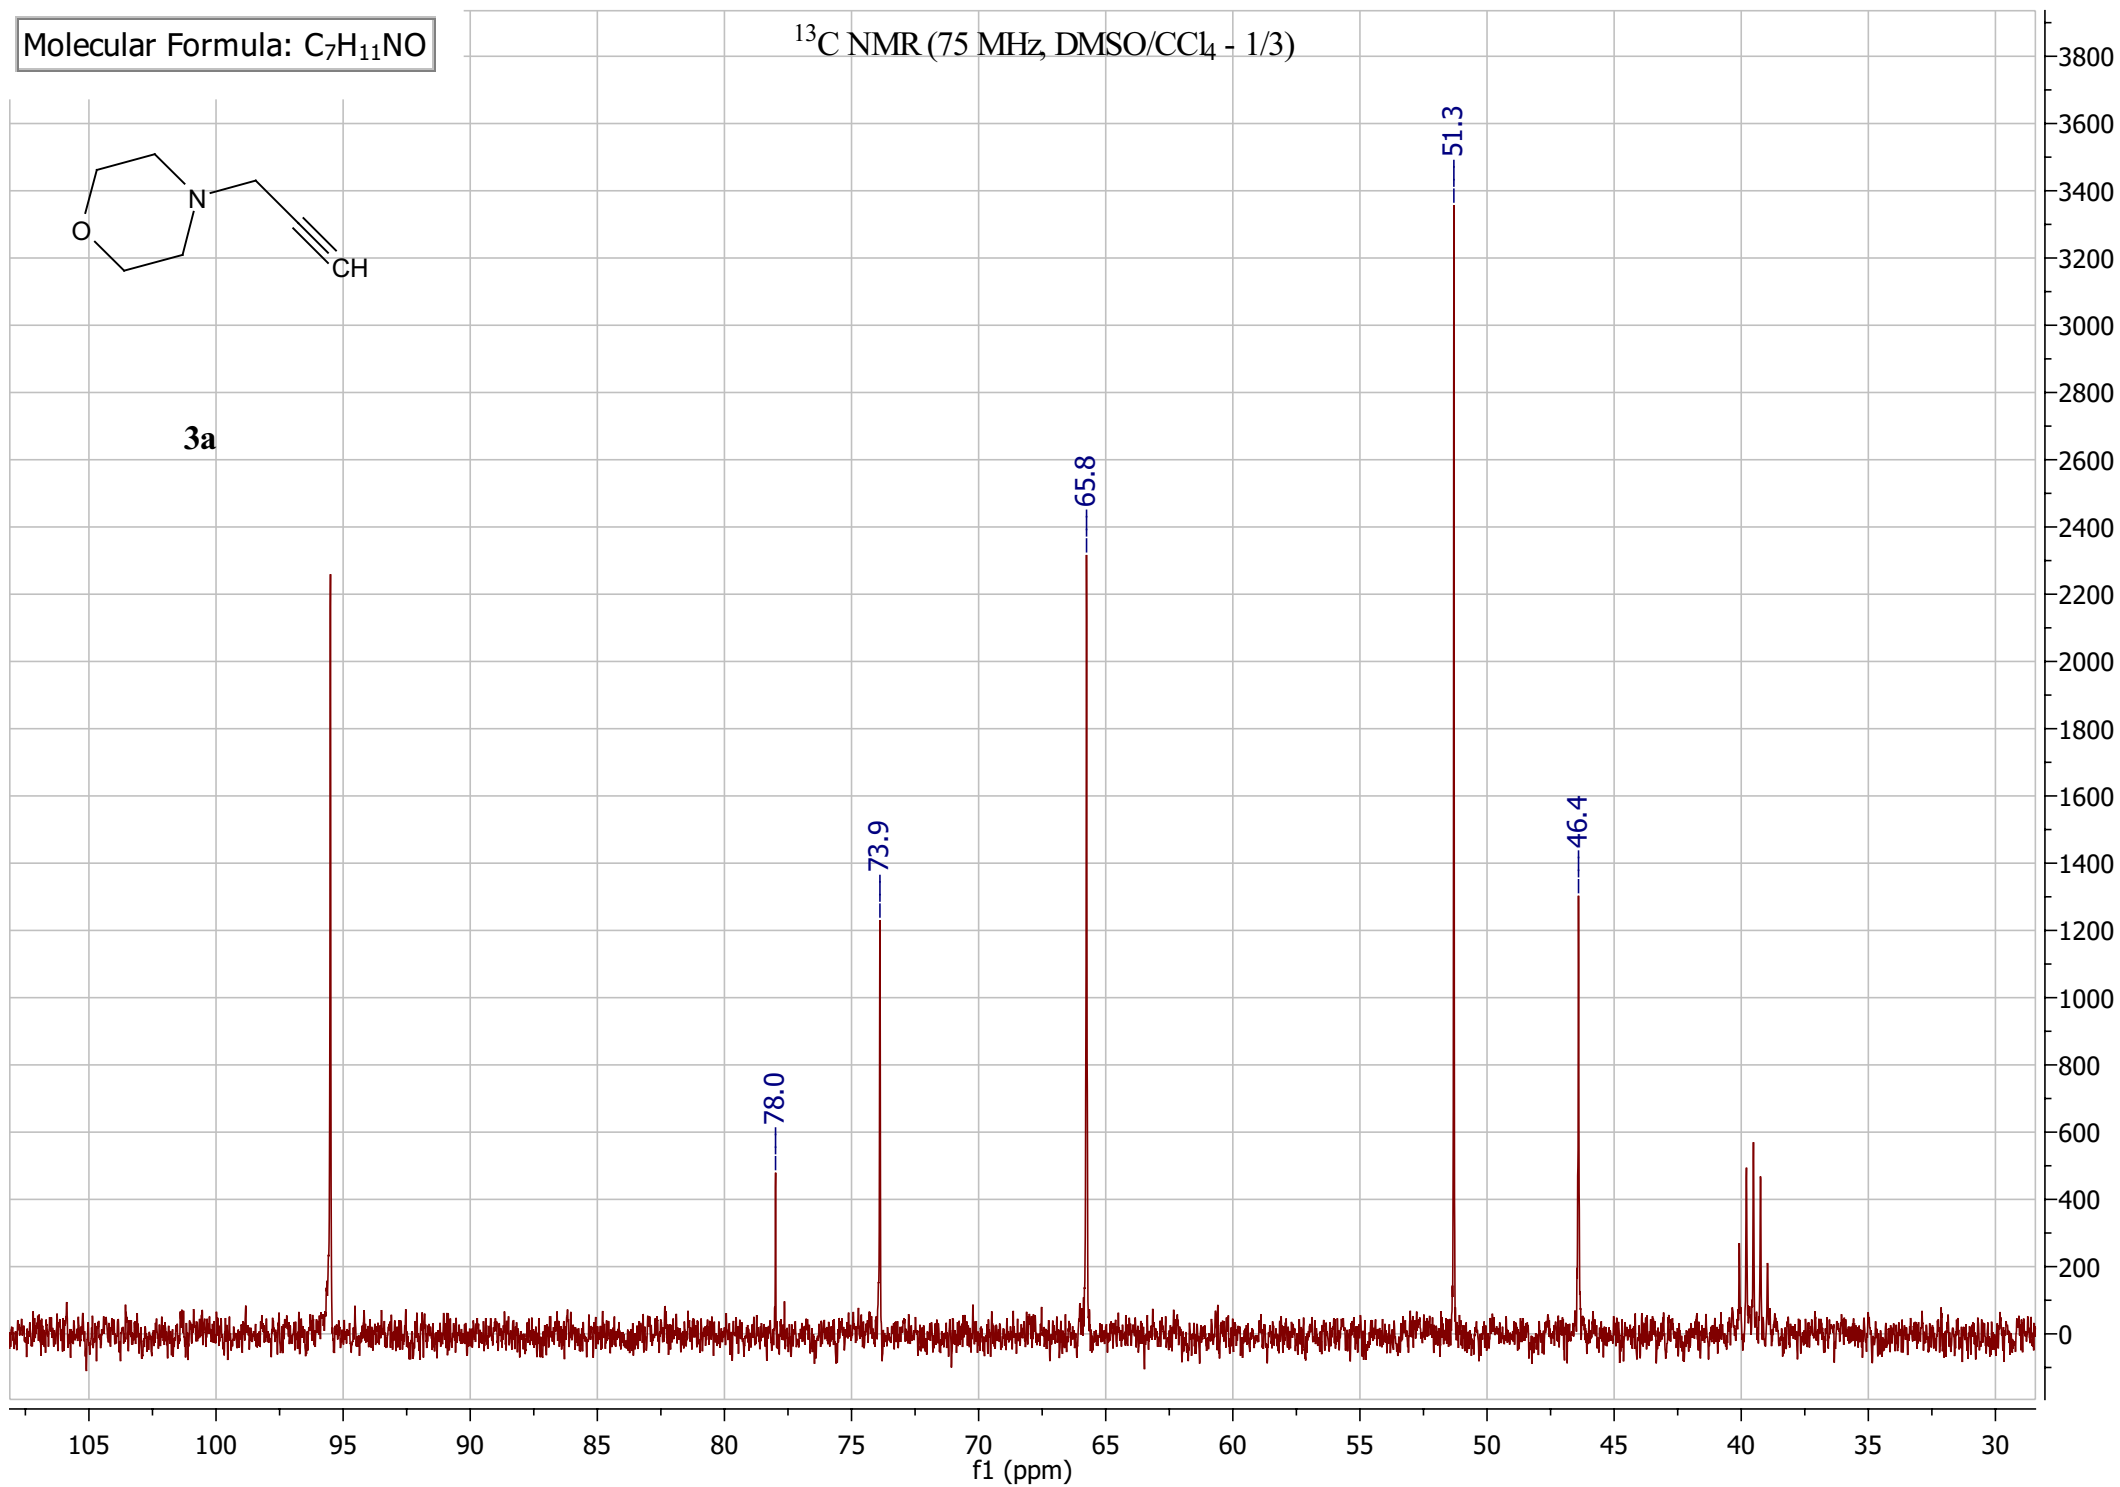

Molecular Formula: C<sub>7</sub>H<sub>11</sub>NO

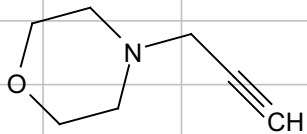

3a

<sup>1</sup>H NMR (300 MHz, DMSO/CCl<sub>4</sub> - 1/3)

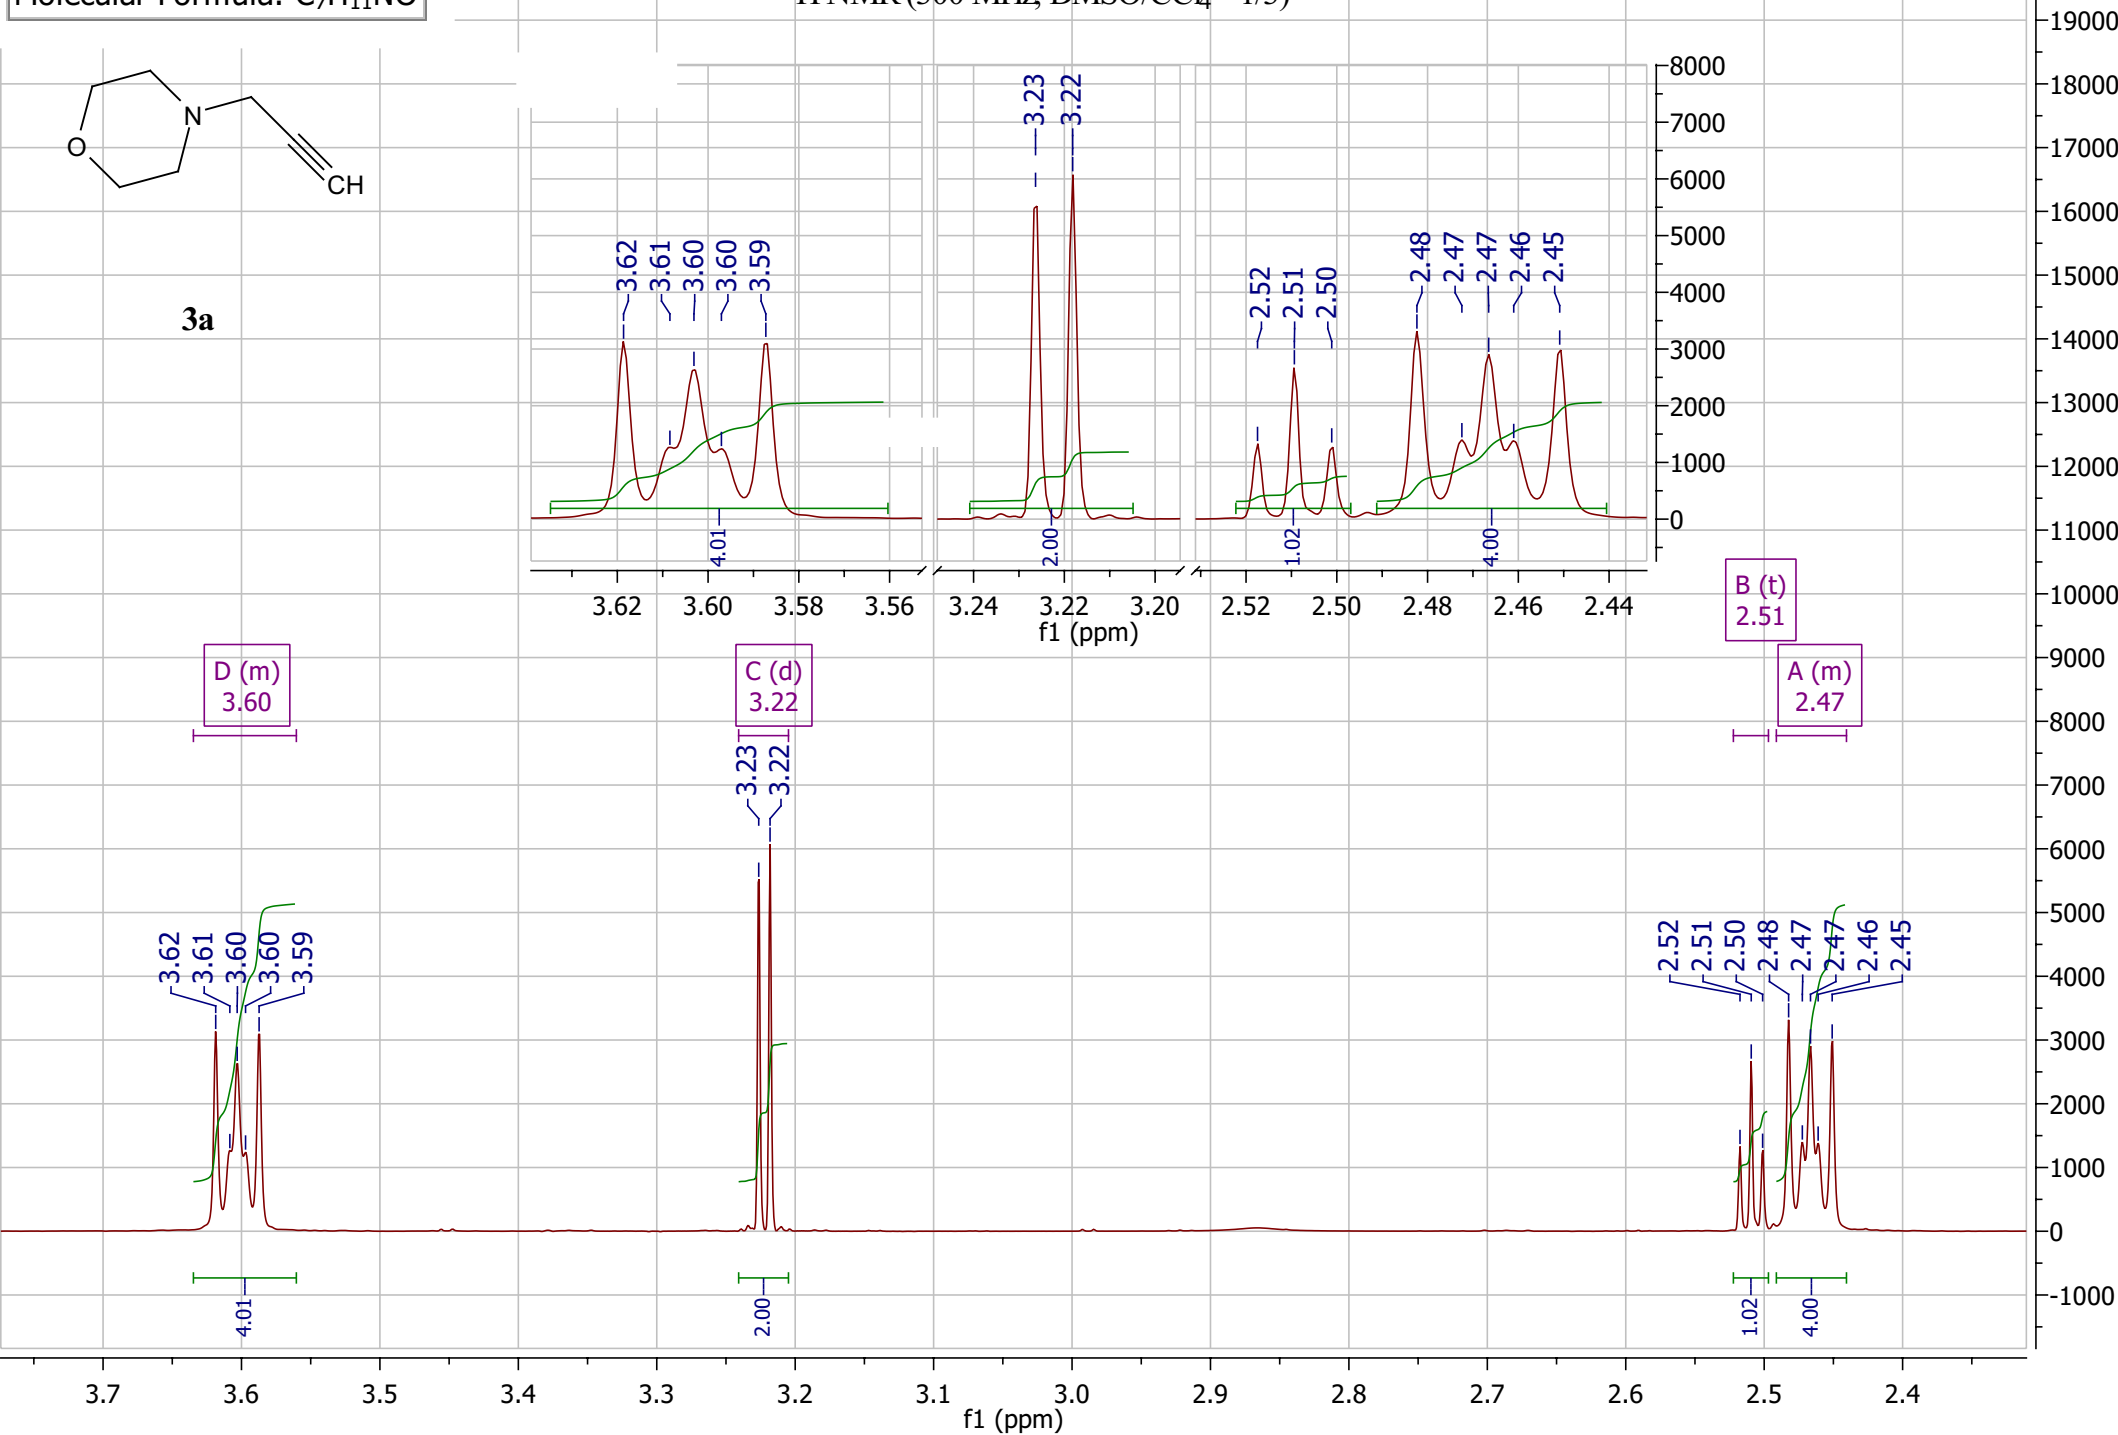

Molecular Formula: C<sub>8</sub>H<sub>14</sub>N<sub>2</sub>

<sup>13</sup>C NMR (75 MHz, DMSO/CCl<sub>4</sub> - 1/3)

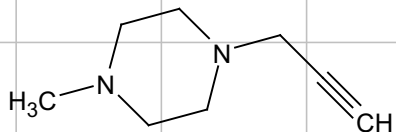

**3b**

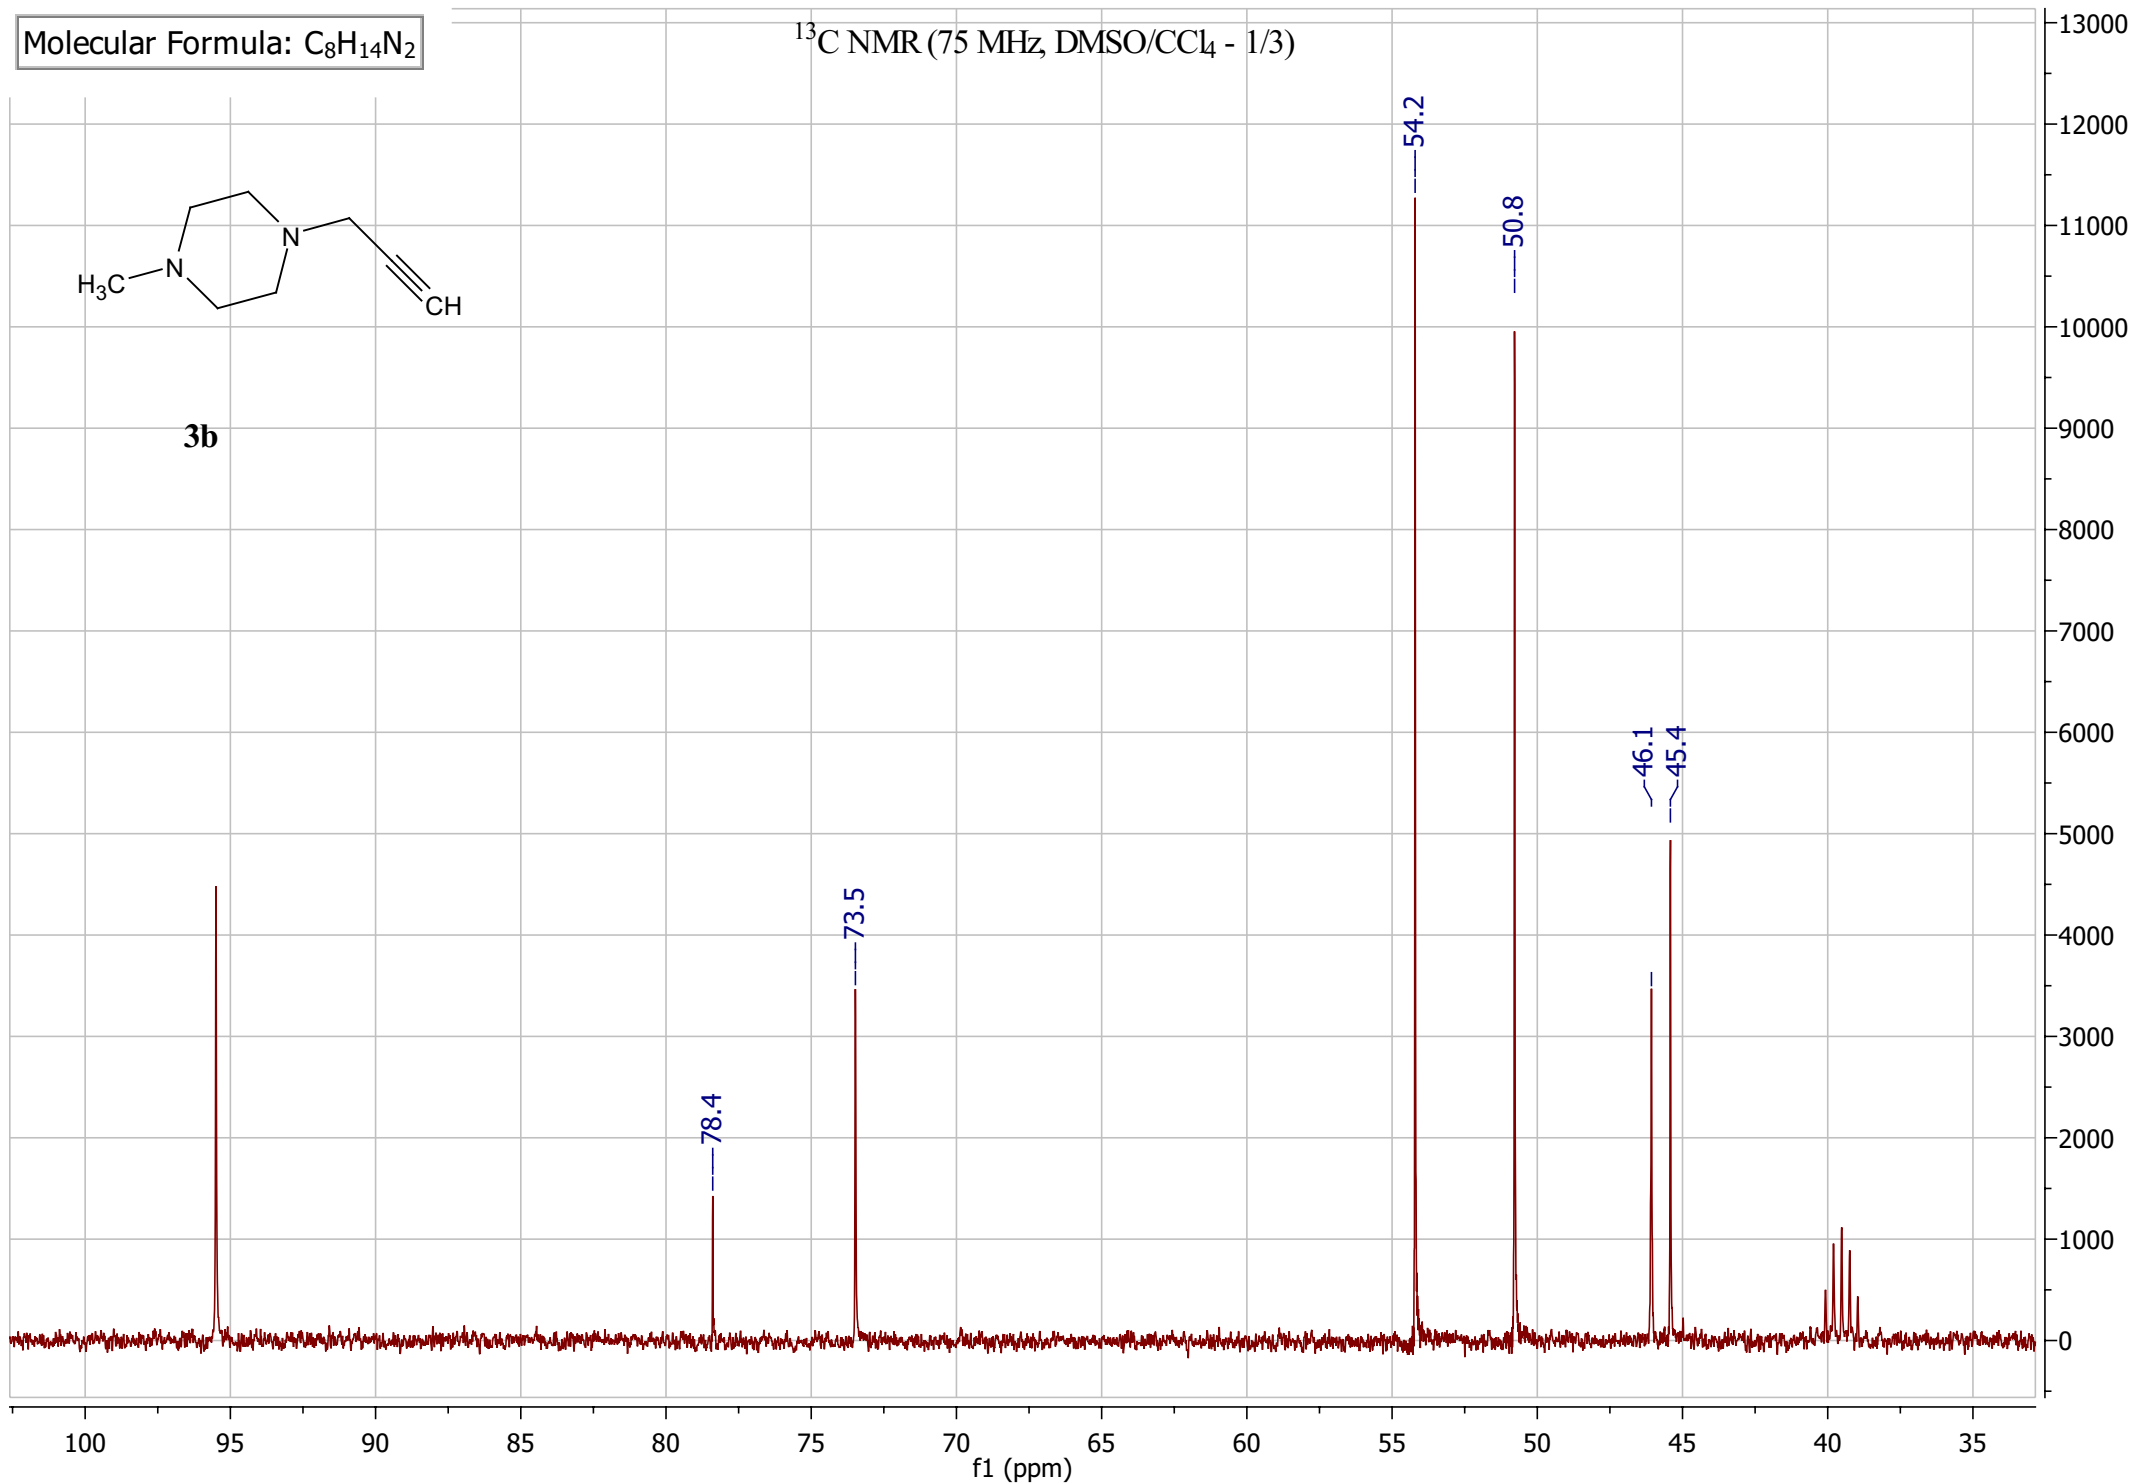

Molecular Formula: C<sub>8</sub>H<sub>14</sub>N<sub>2</sub>

<sup>1</sup>H NMR (300 MHz, DMSO/CCl<sub>4</sub> - 1/3)

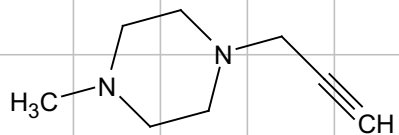

**3b**

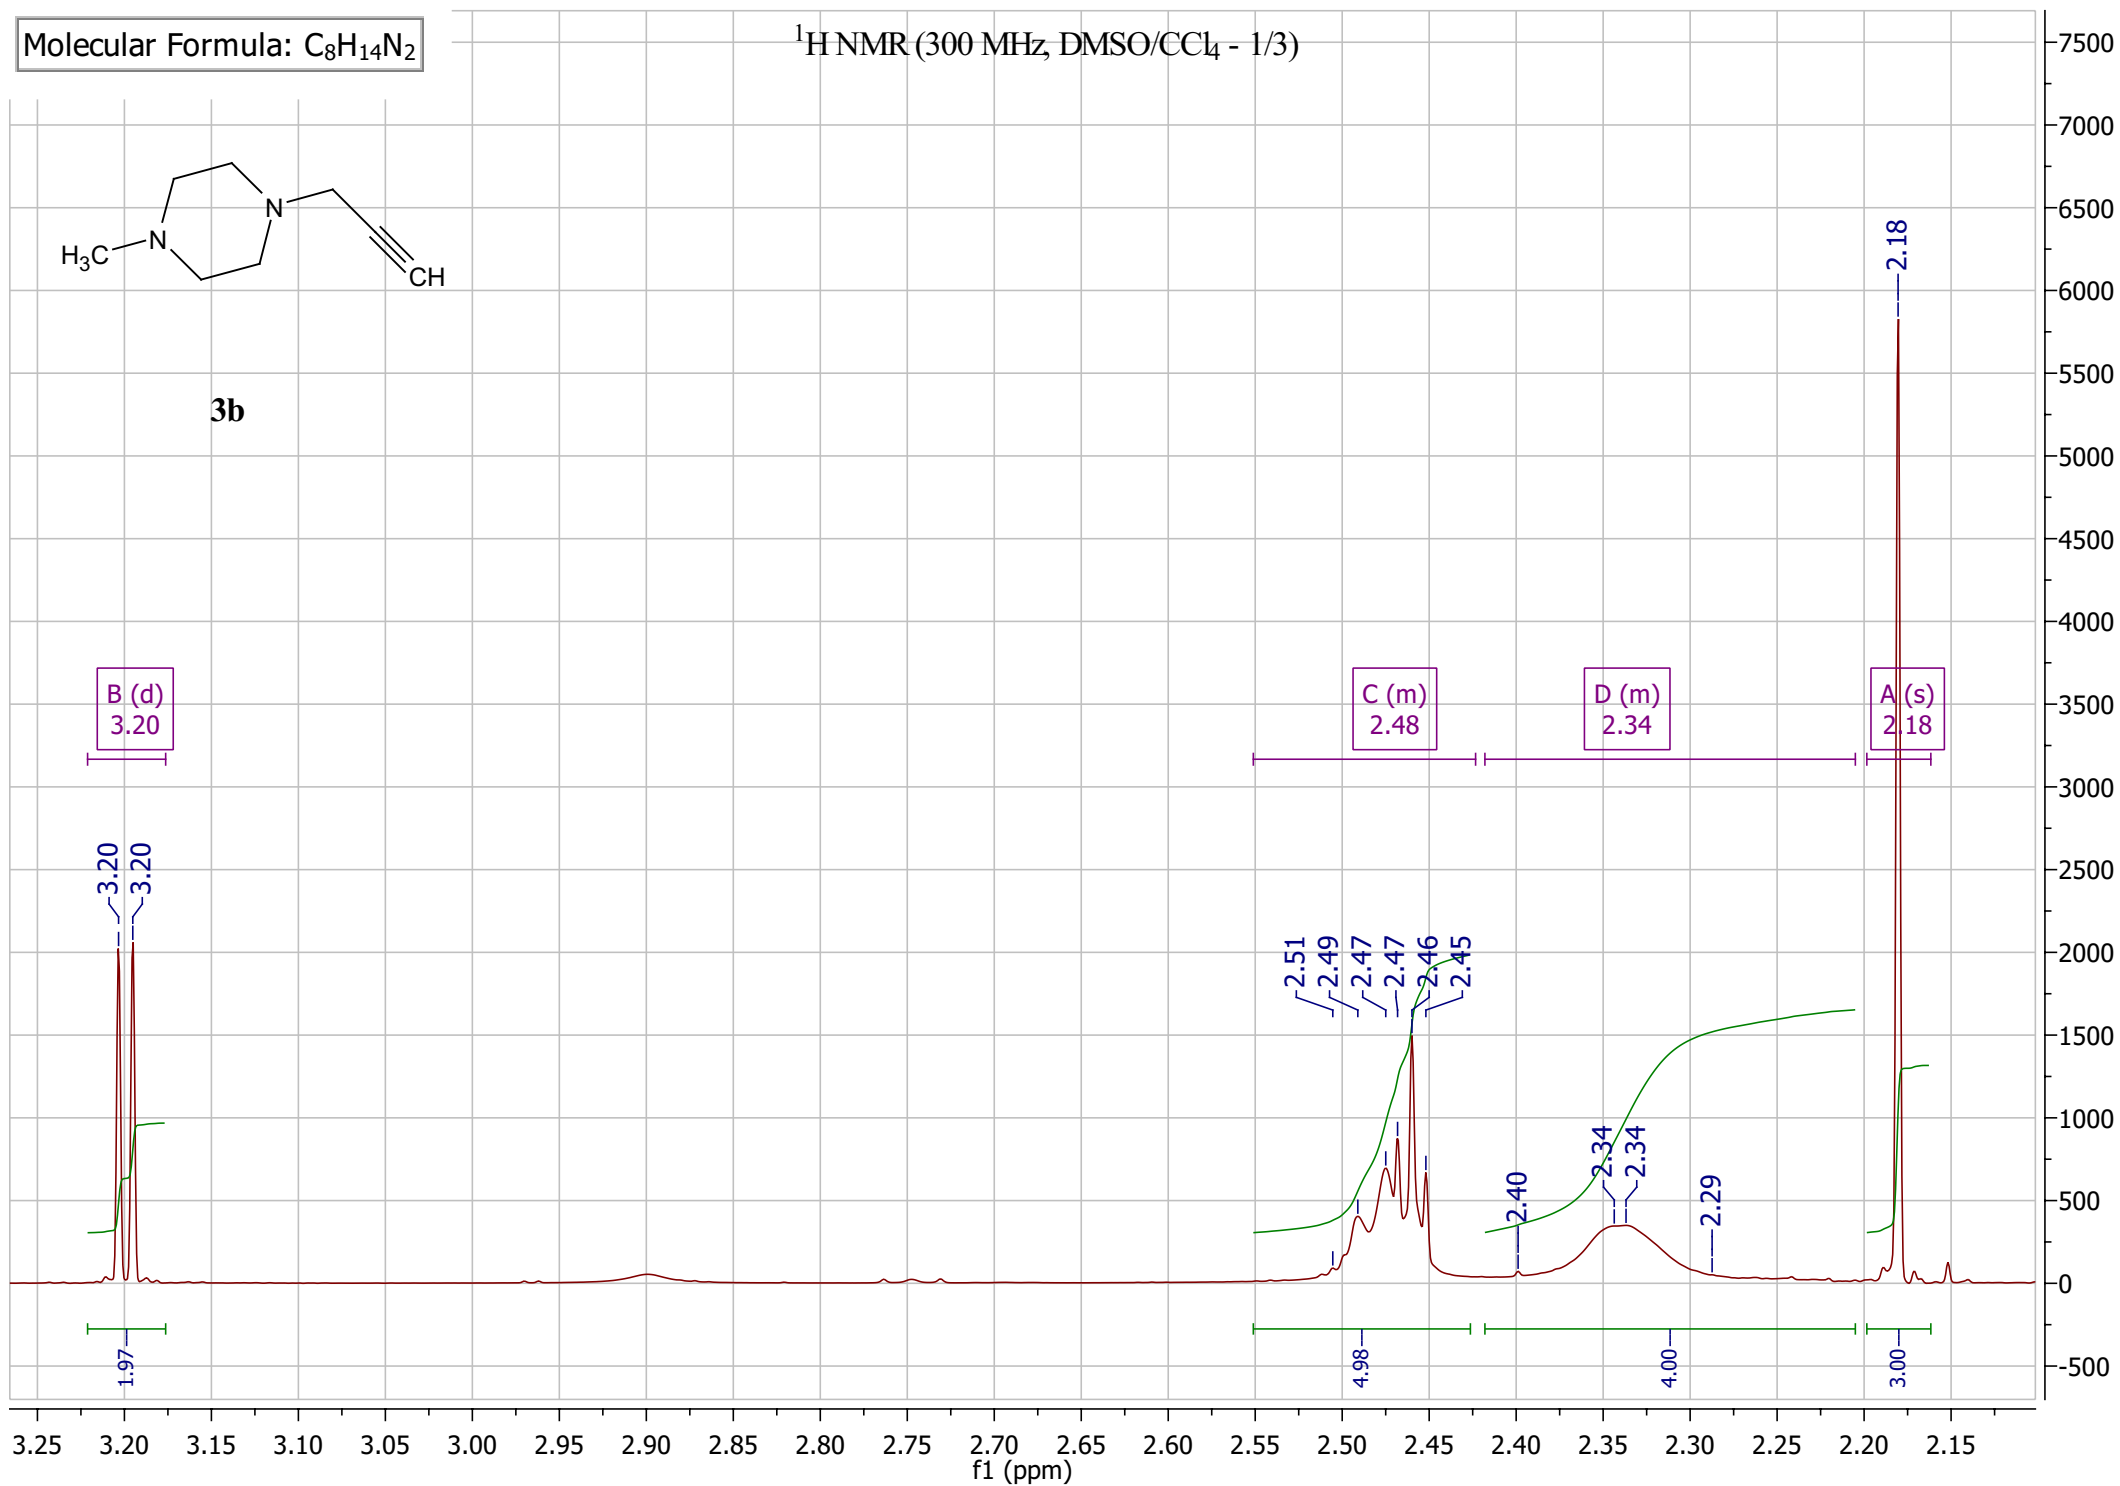



Molecular Formula: C<sub>7</sub>H<sub>11</sub>N

<sup>13</sup>C NMR (75 MHz, DMSO/CCl<sub>4</sub> - 1/3)

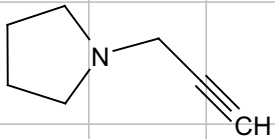

**3c**

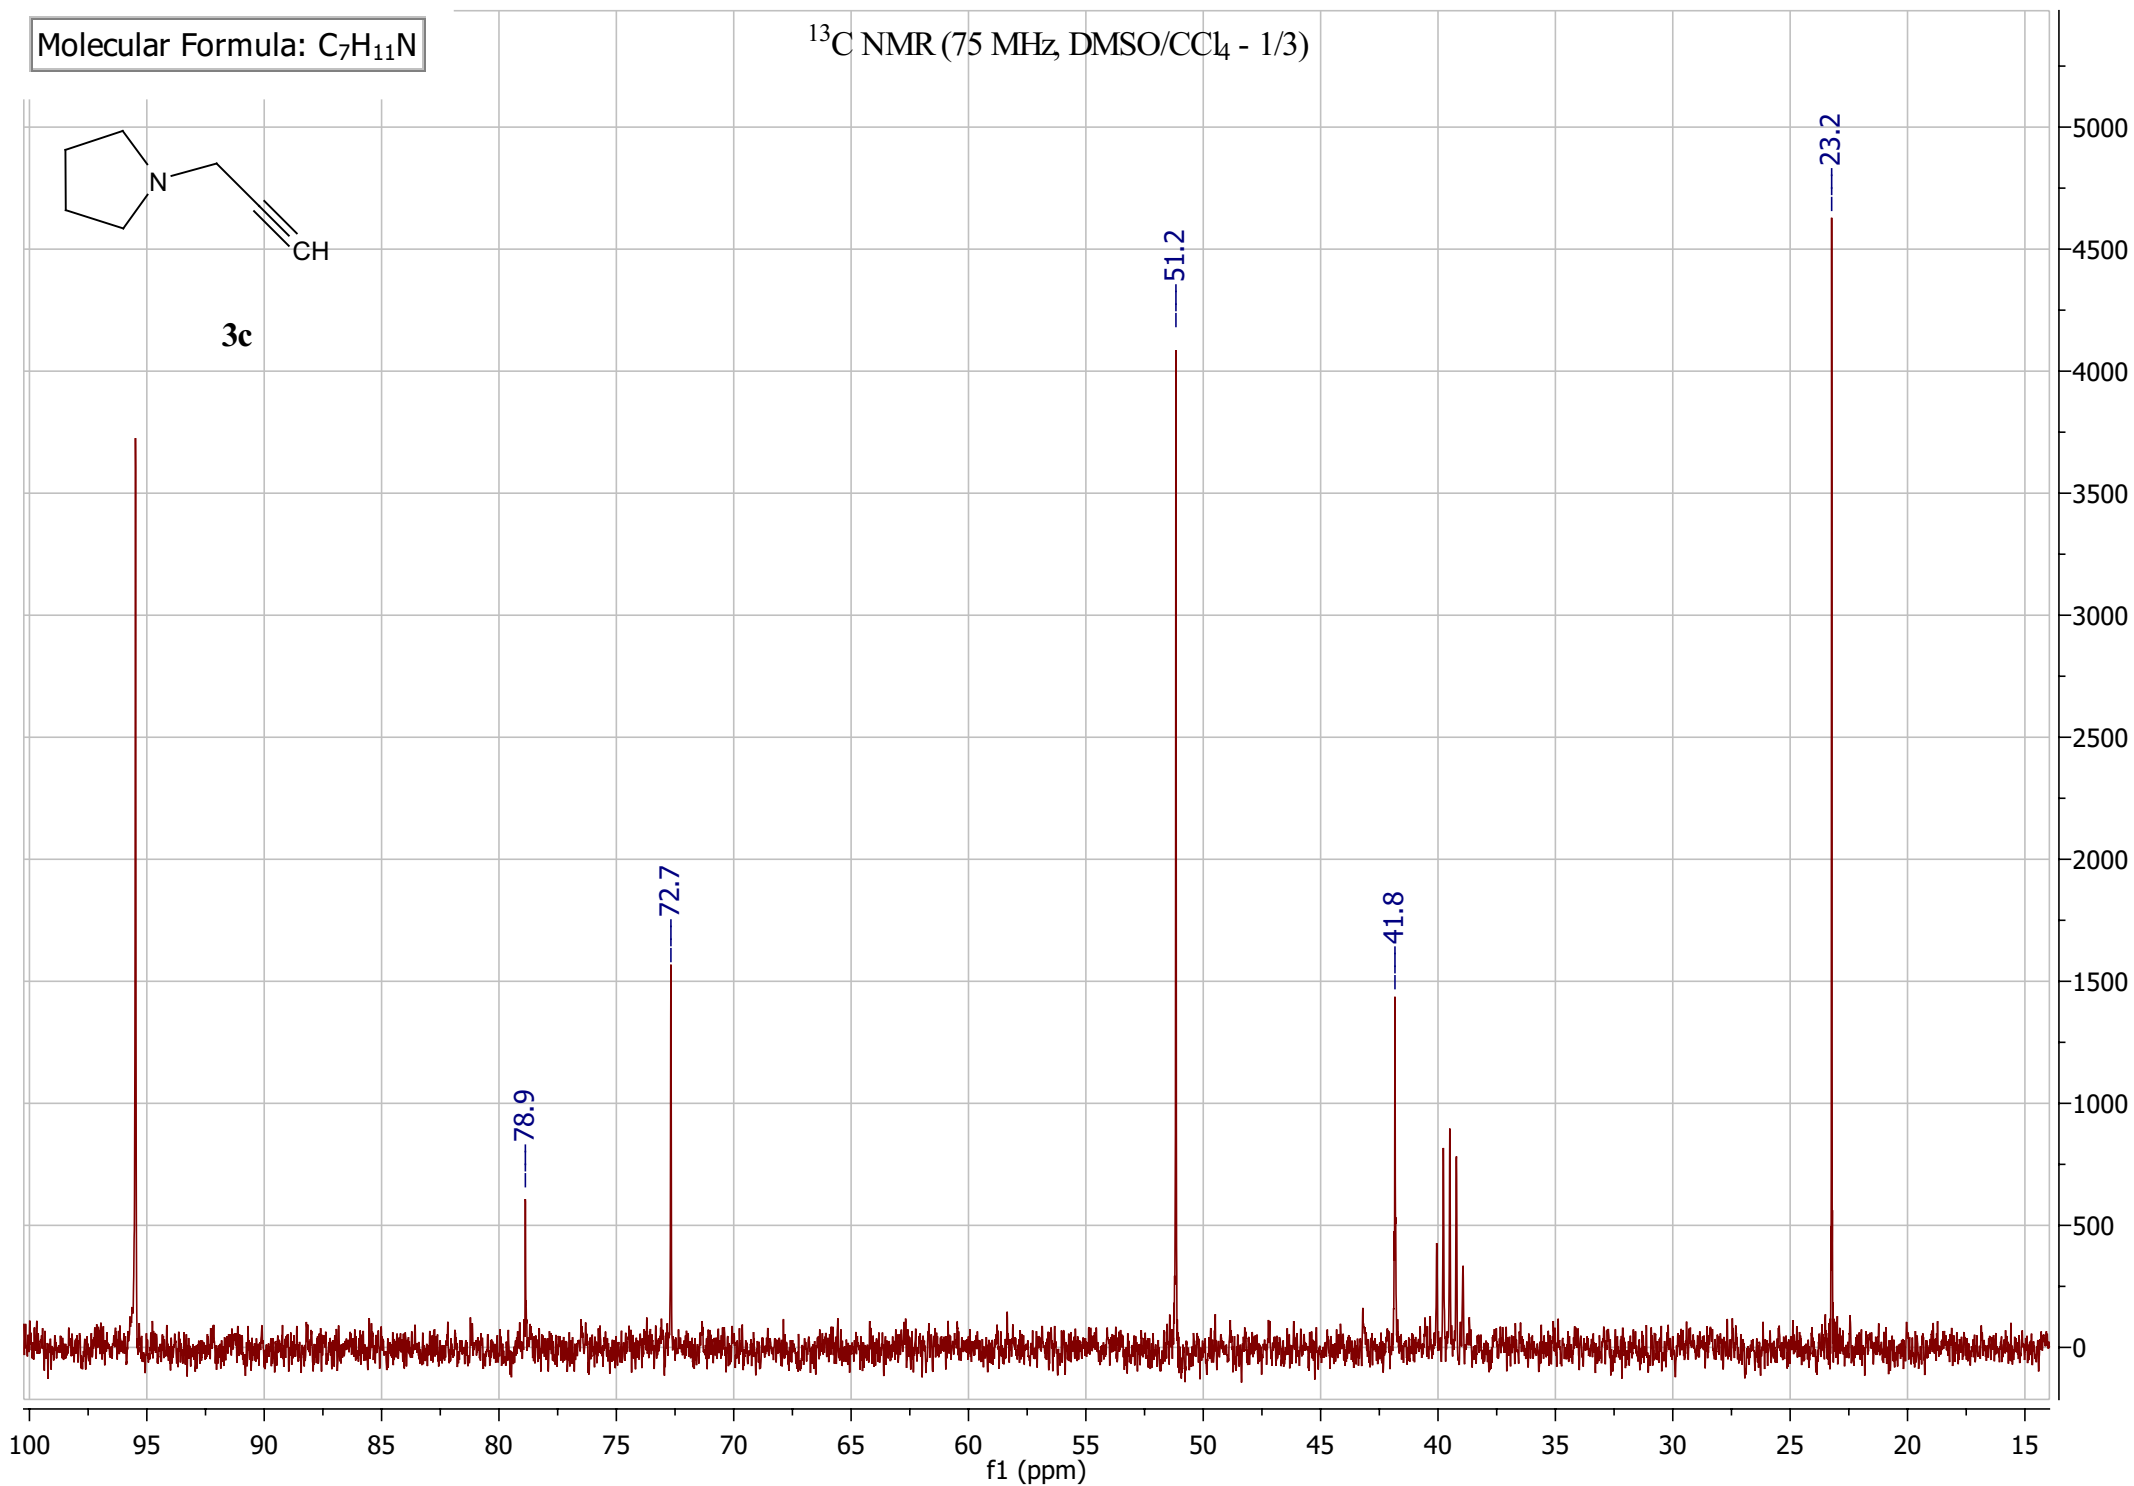

Molecular Formula: C<sub>7</sub>H<sub>11</sub>N

<sup>1</sup>H NMR (300 MHz, DMSO/CCl<sub>4</sub> - 1/3)

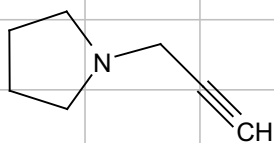

3c

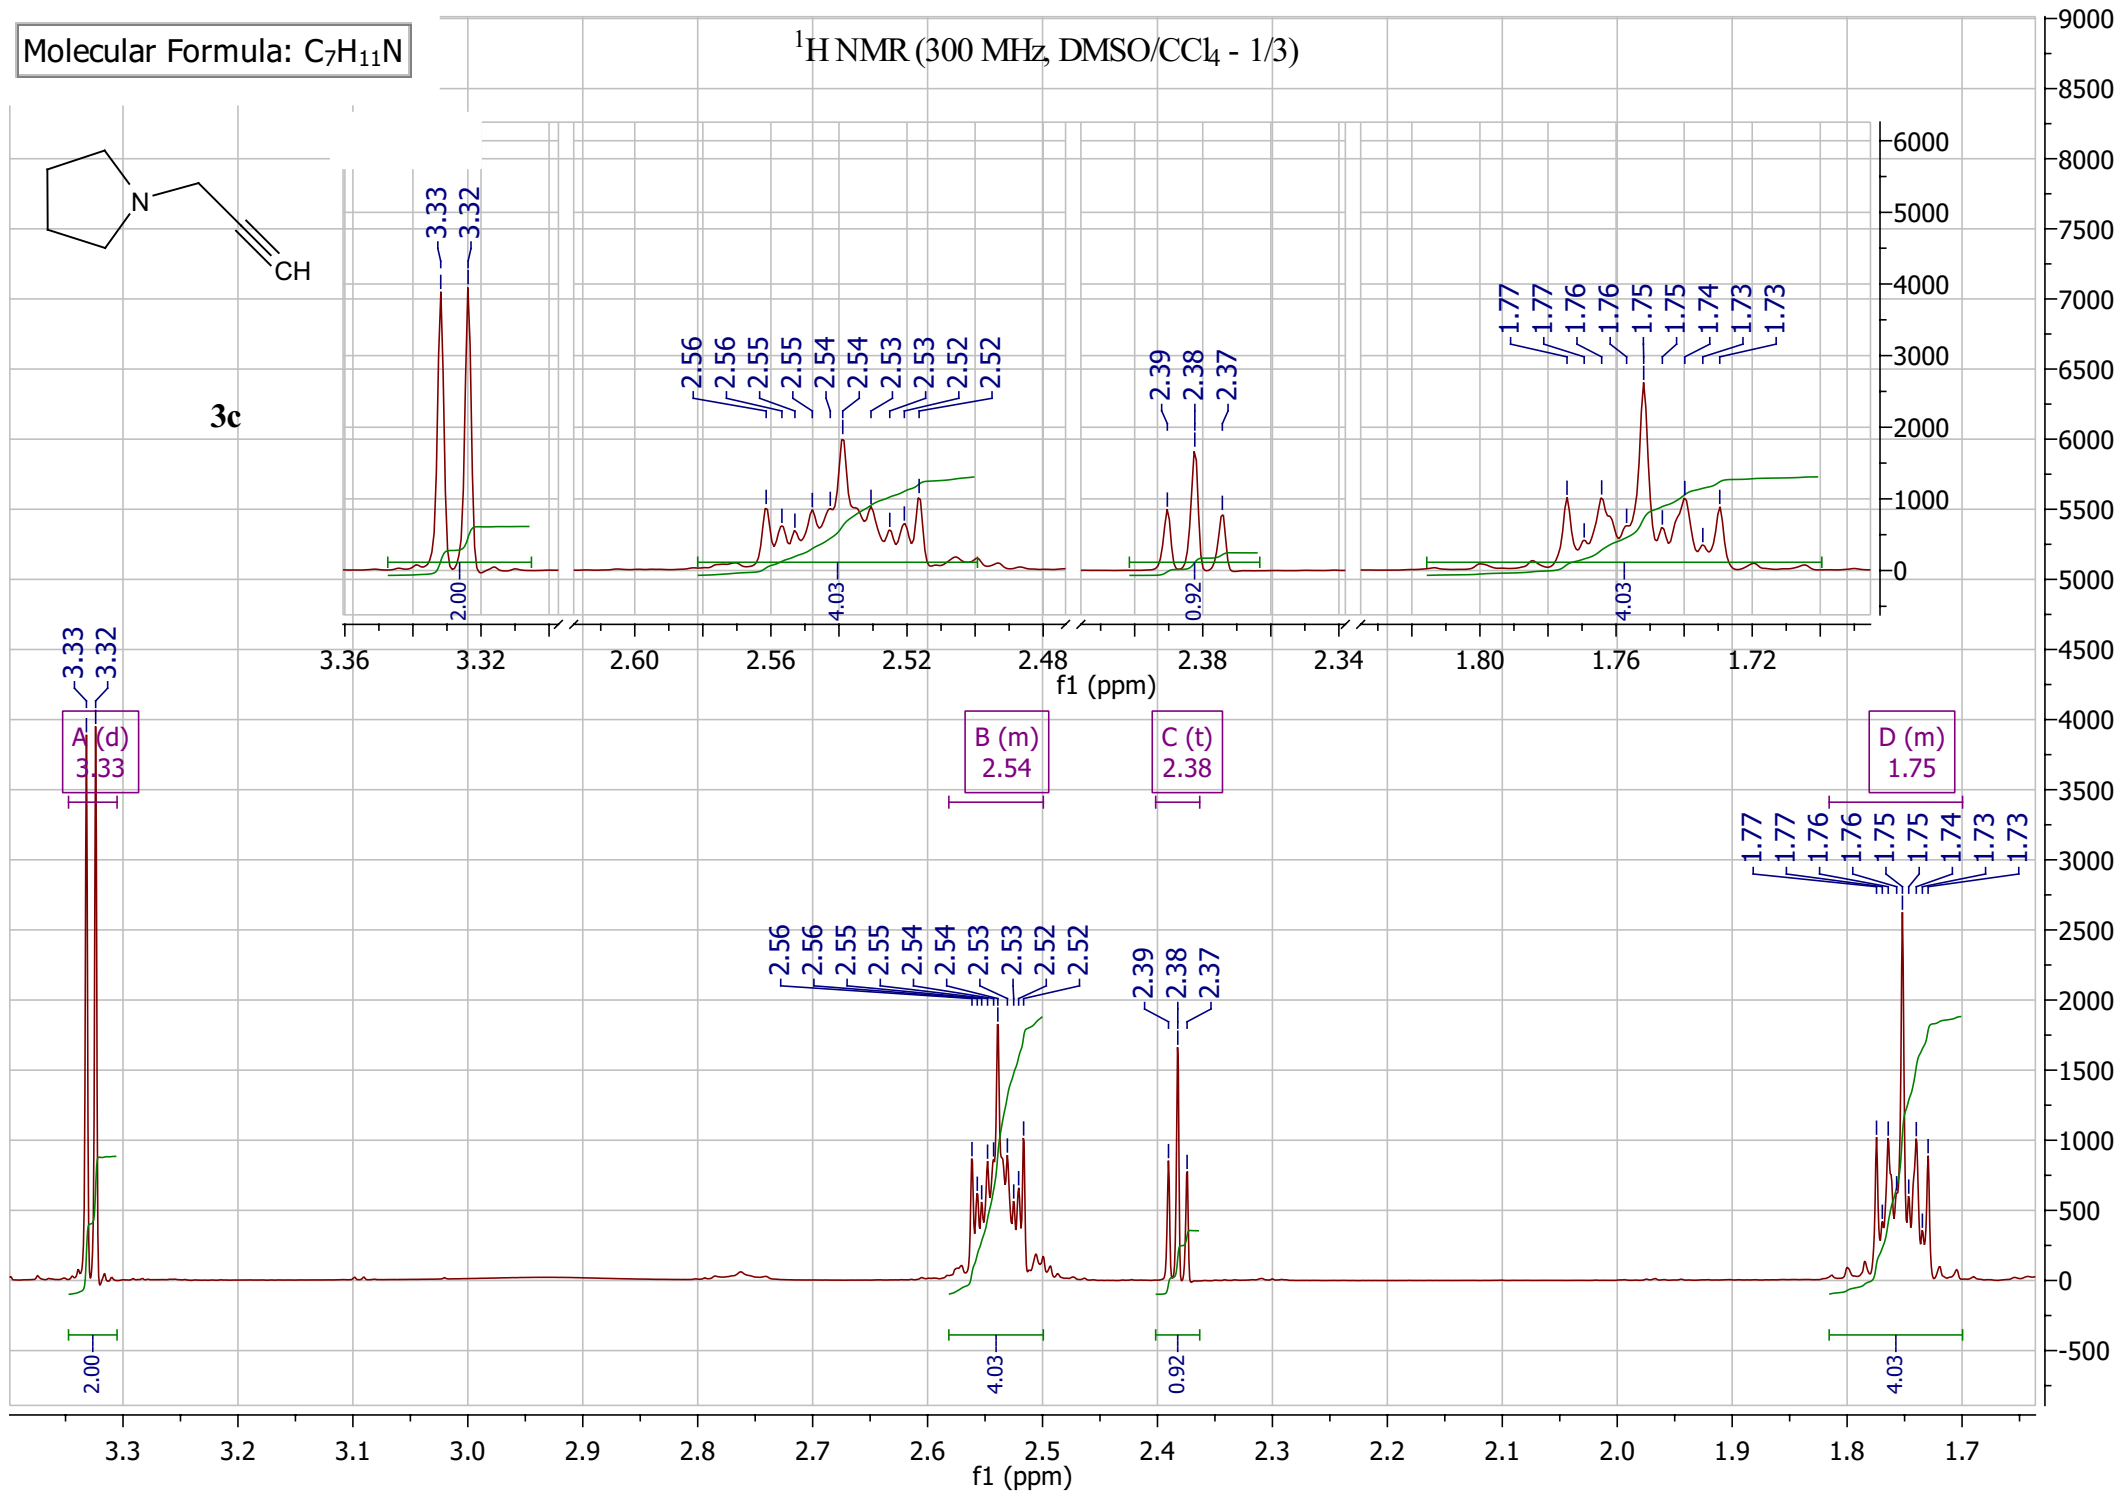

Molecular Formula: C<sub>8</sub>H<sub>13</sub>N

<sup>13</sup>C NMR (75 MHz, DMSO/CCl<sub>4</sub> - 1/3)

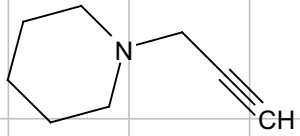

**3d**

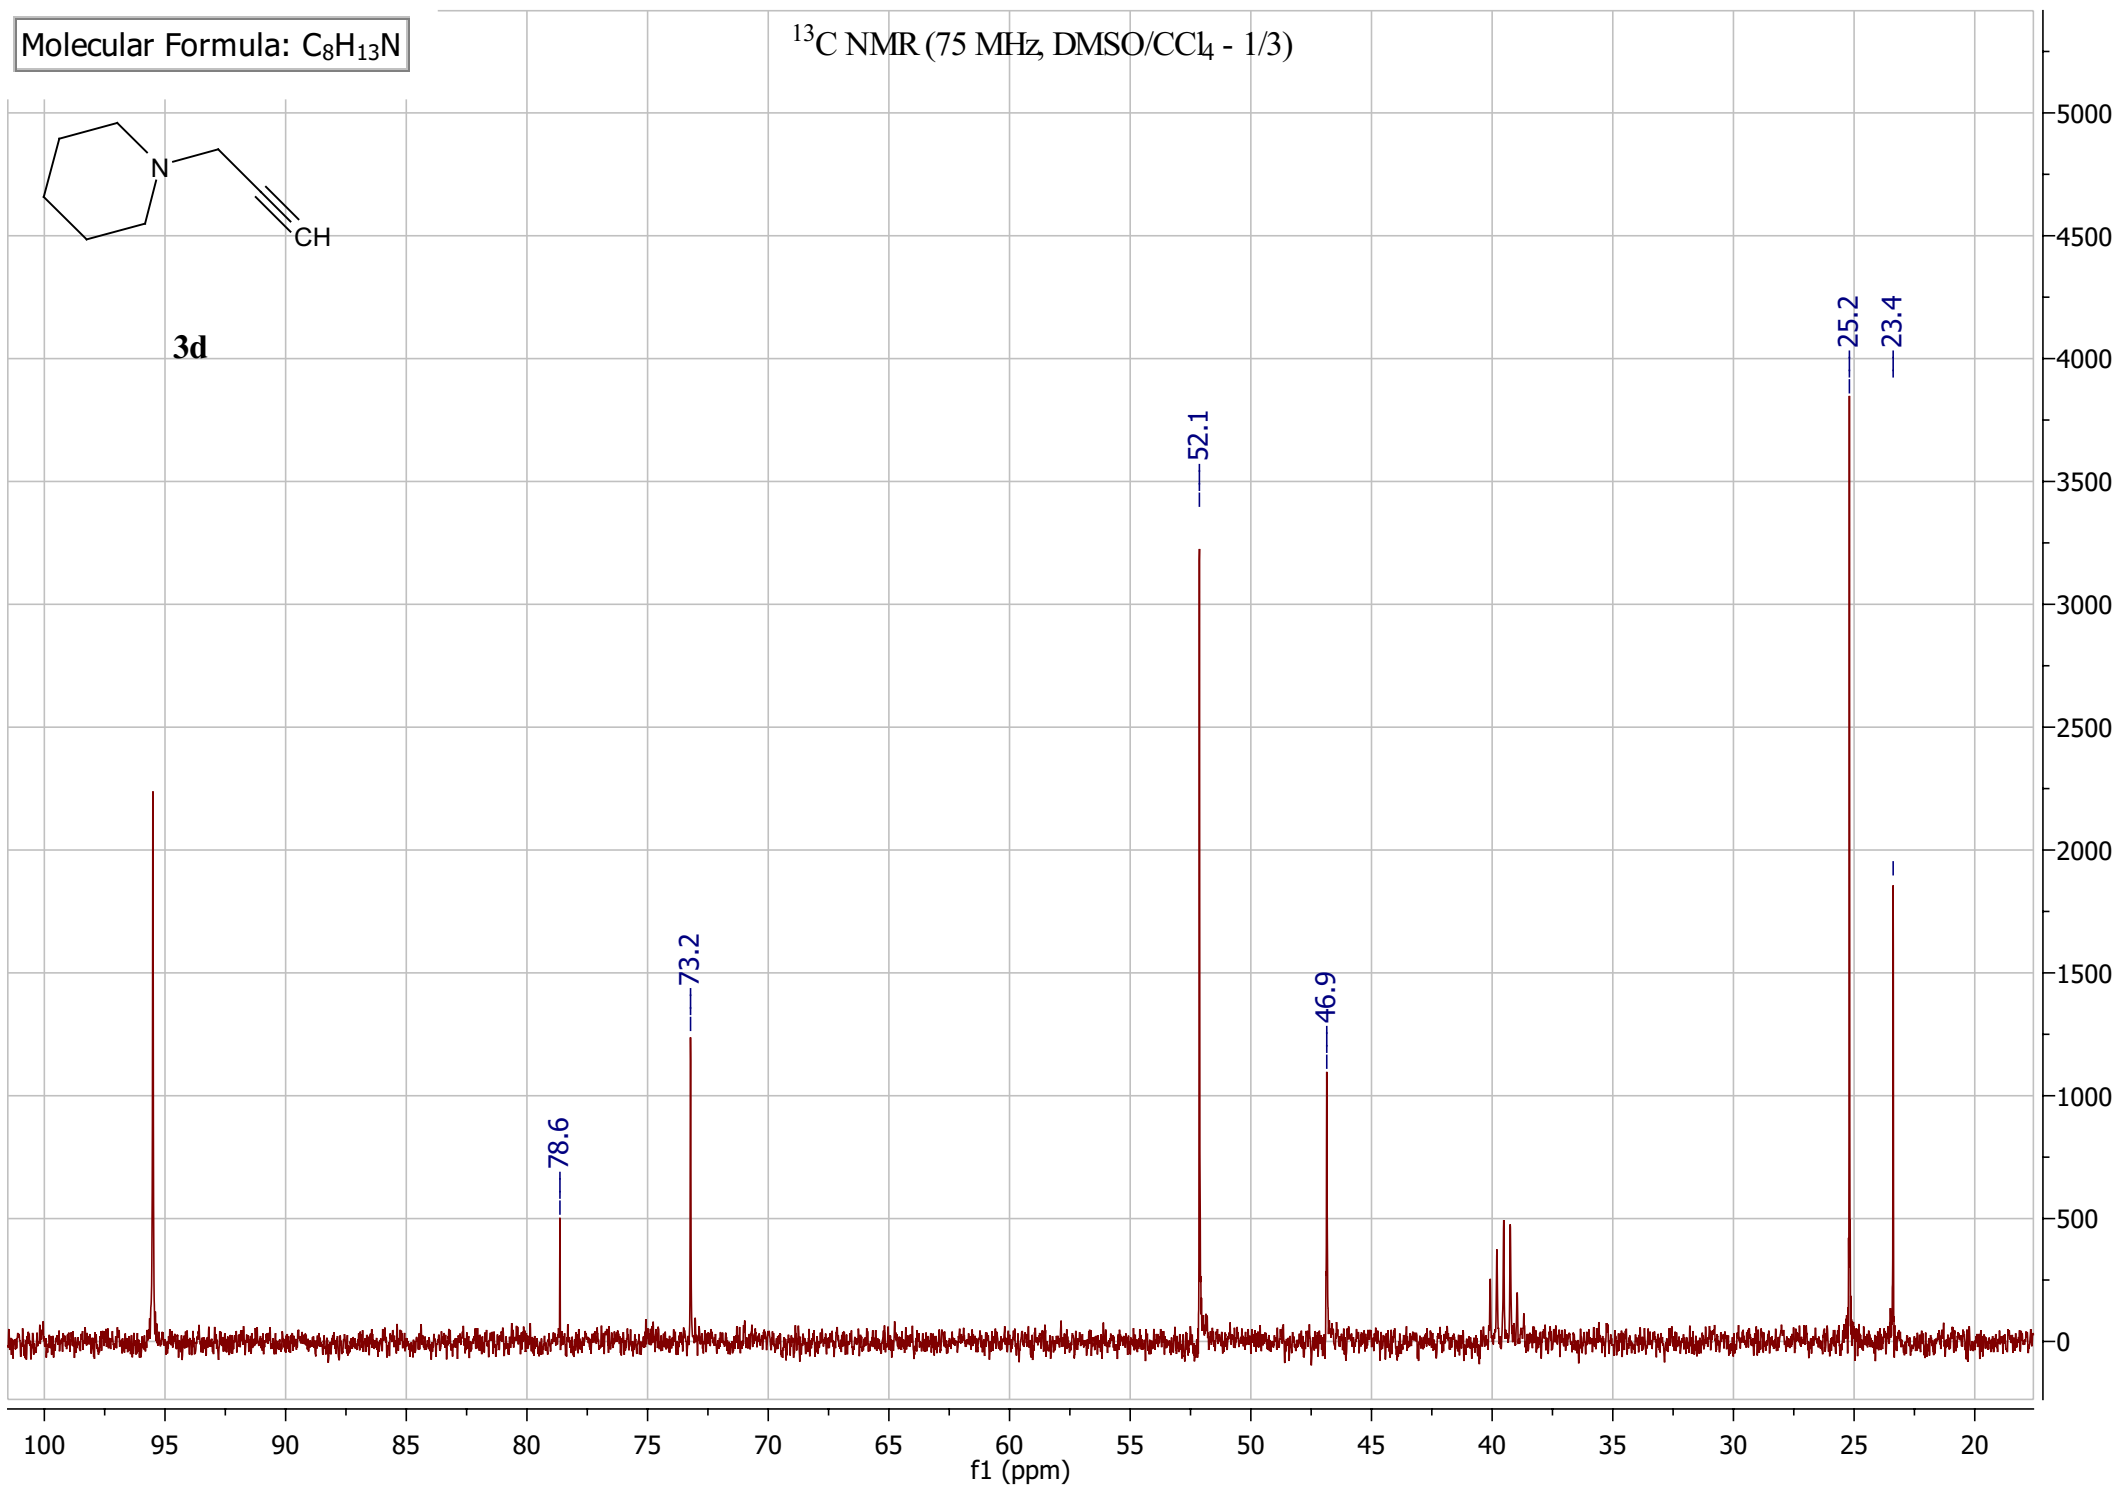

Molecular Formula: C<sub>8</sub>H<sub>13</sub>N

<sup>1</sup>H NMR (300 MHz, DMSO/CCl<sub>4</sub> - 1/3)

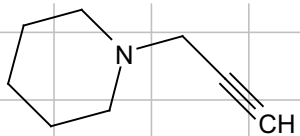

3d

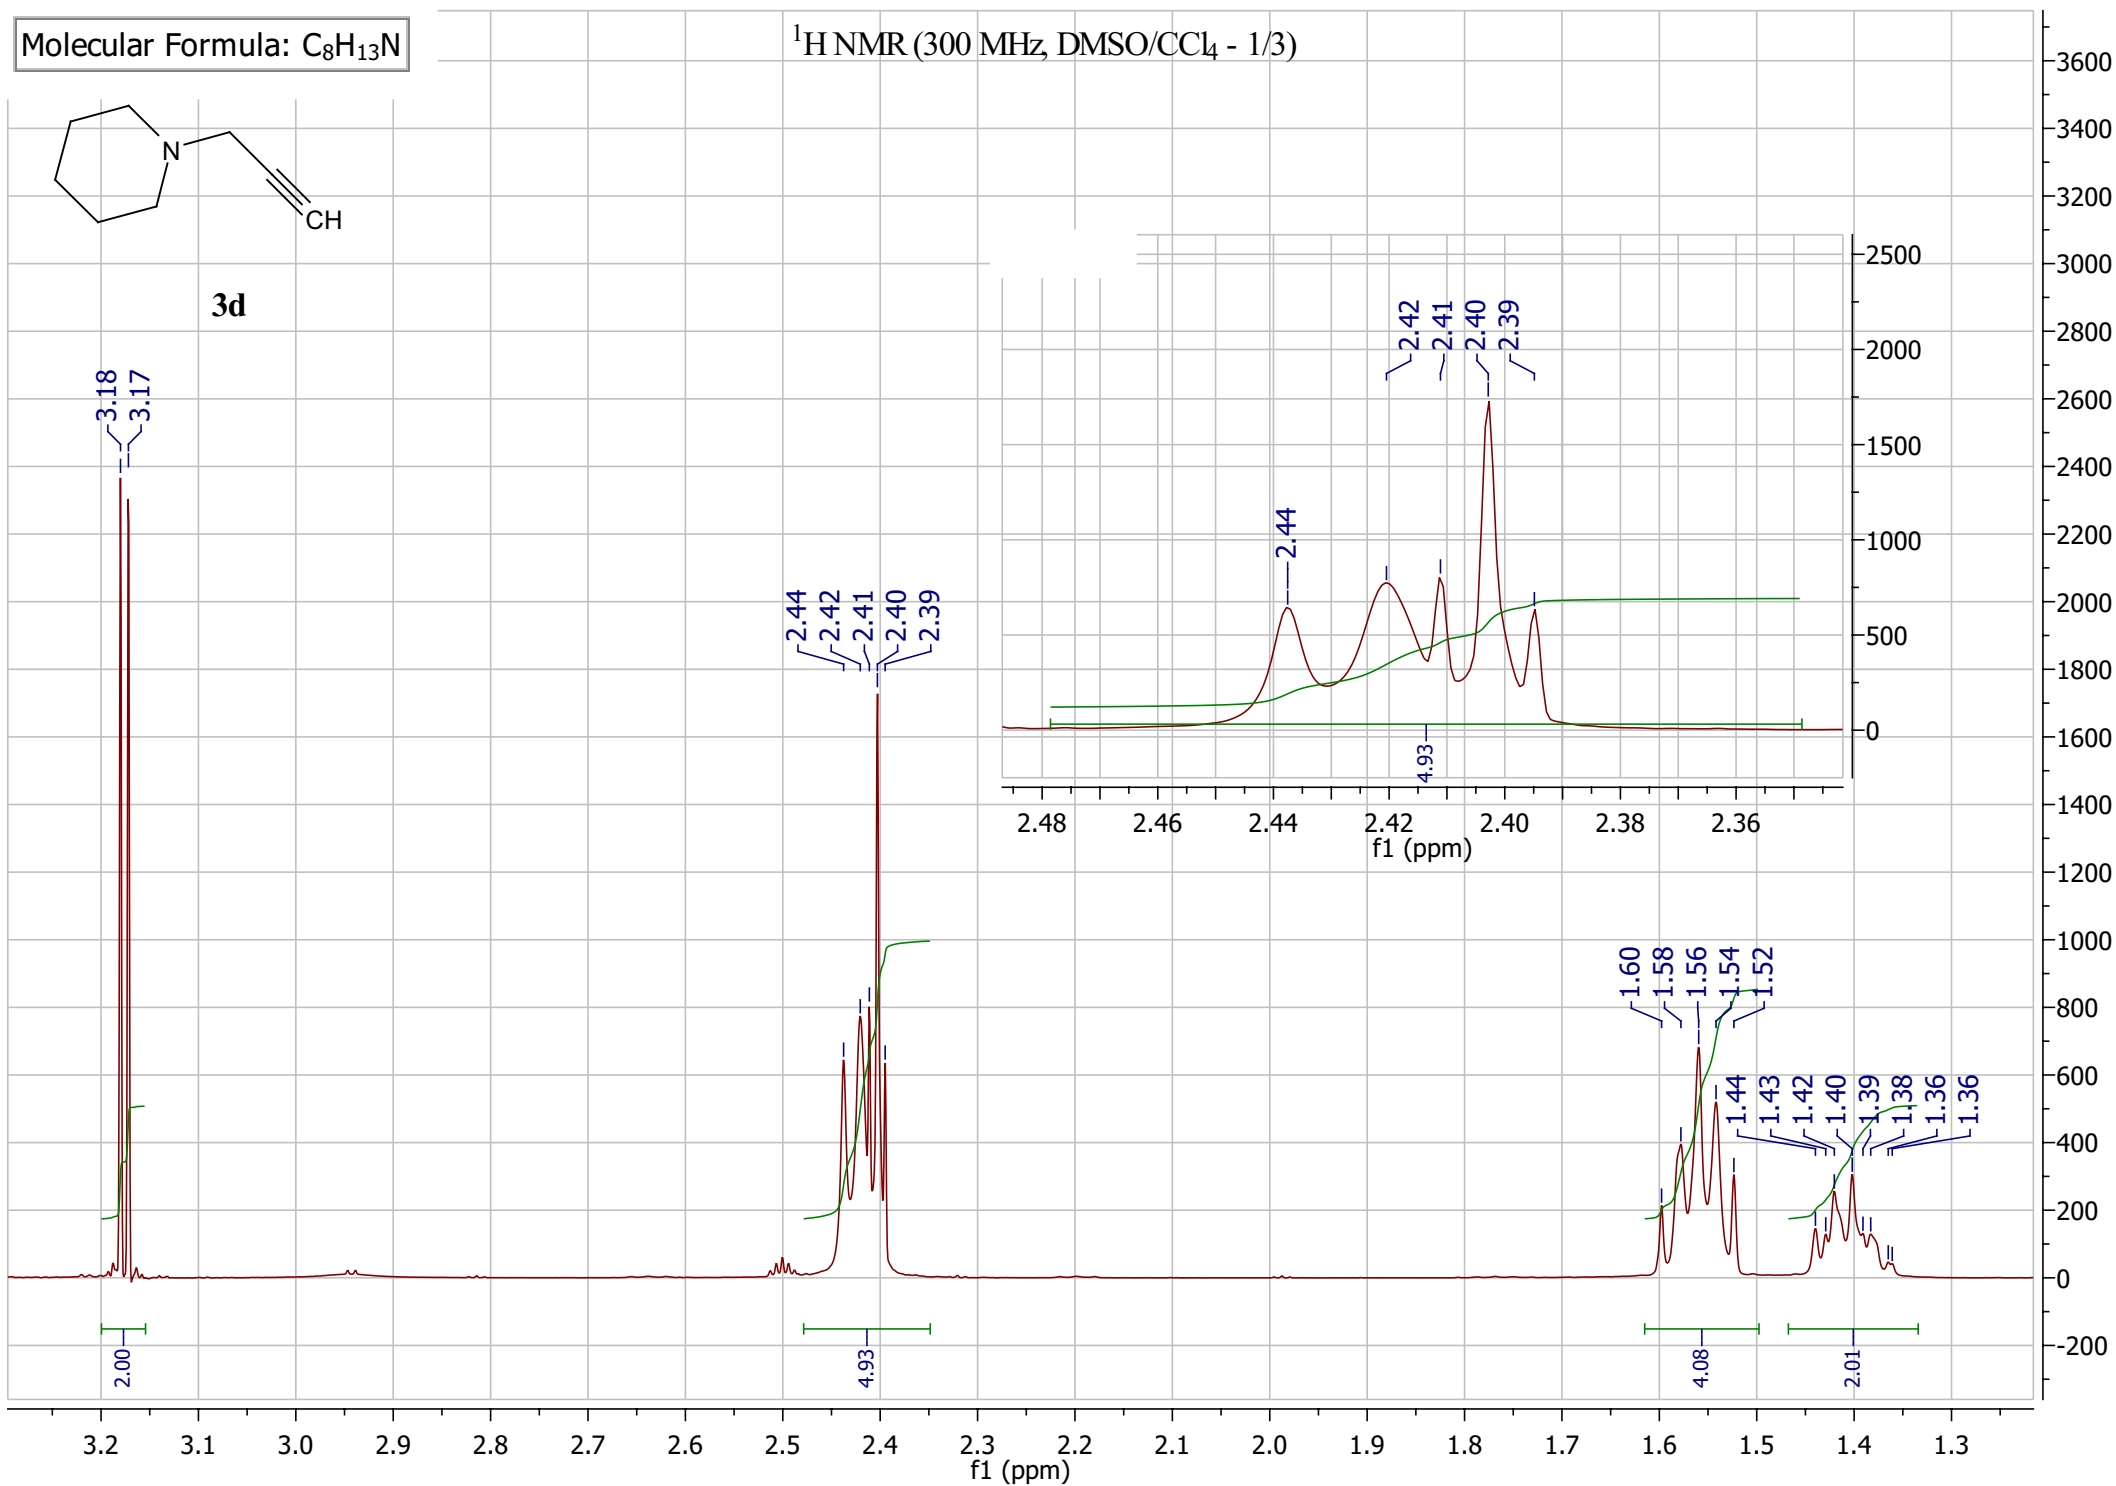

Molecular Formula: C<sub>9</sub>H<sub>15</sub>N

<sup>13</sup>C NMR (75 MHz, DMSO/CCl<sub>4</sub> - 1/3)

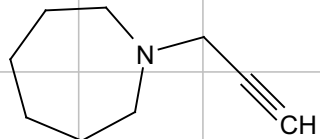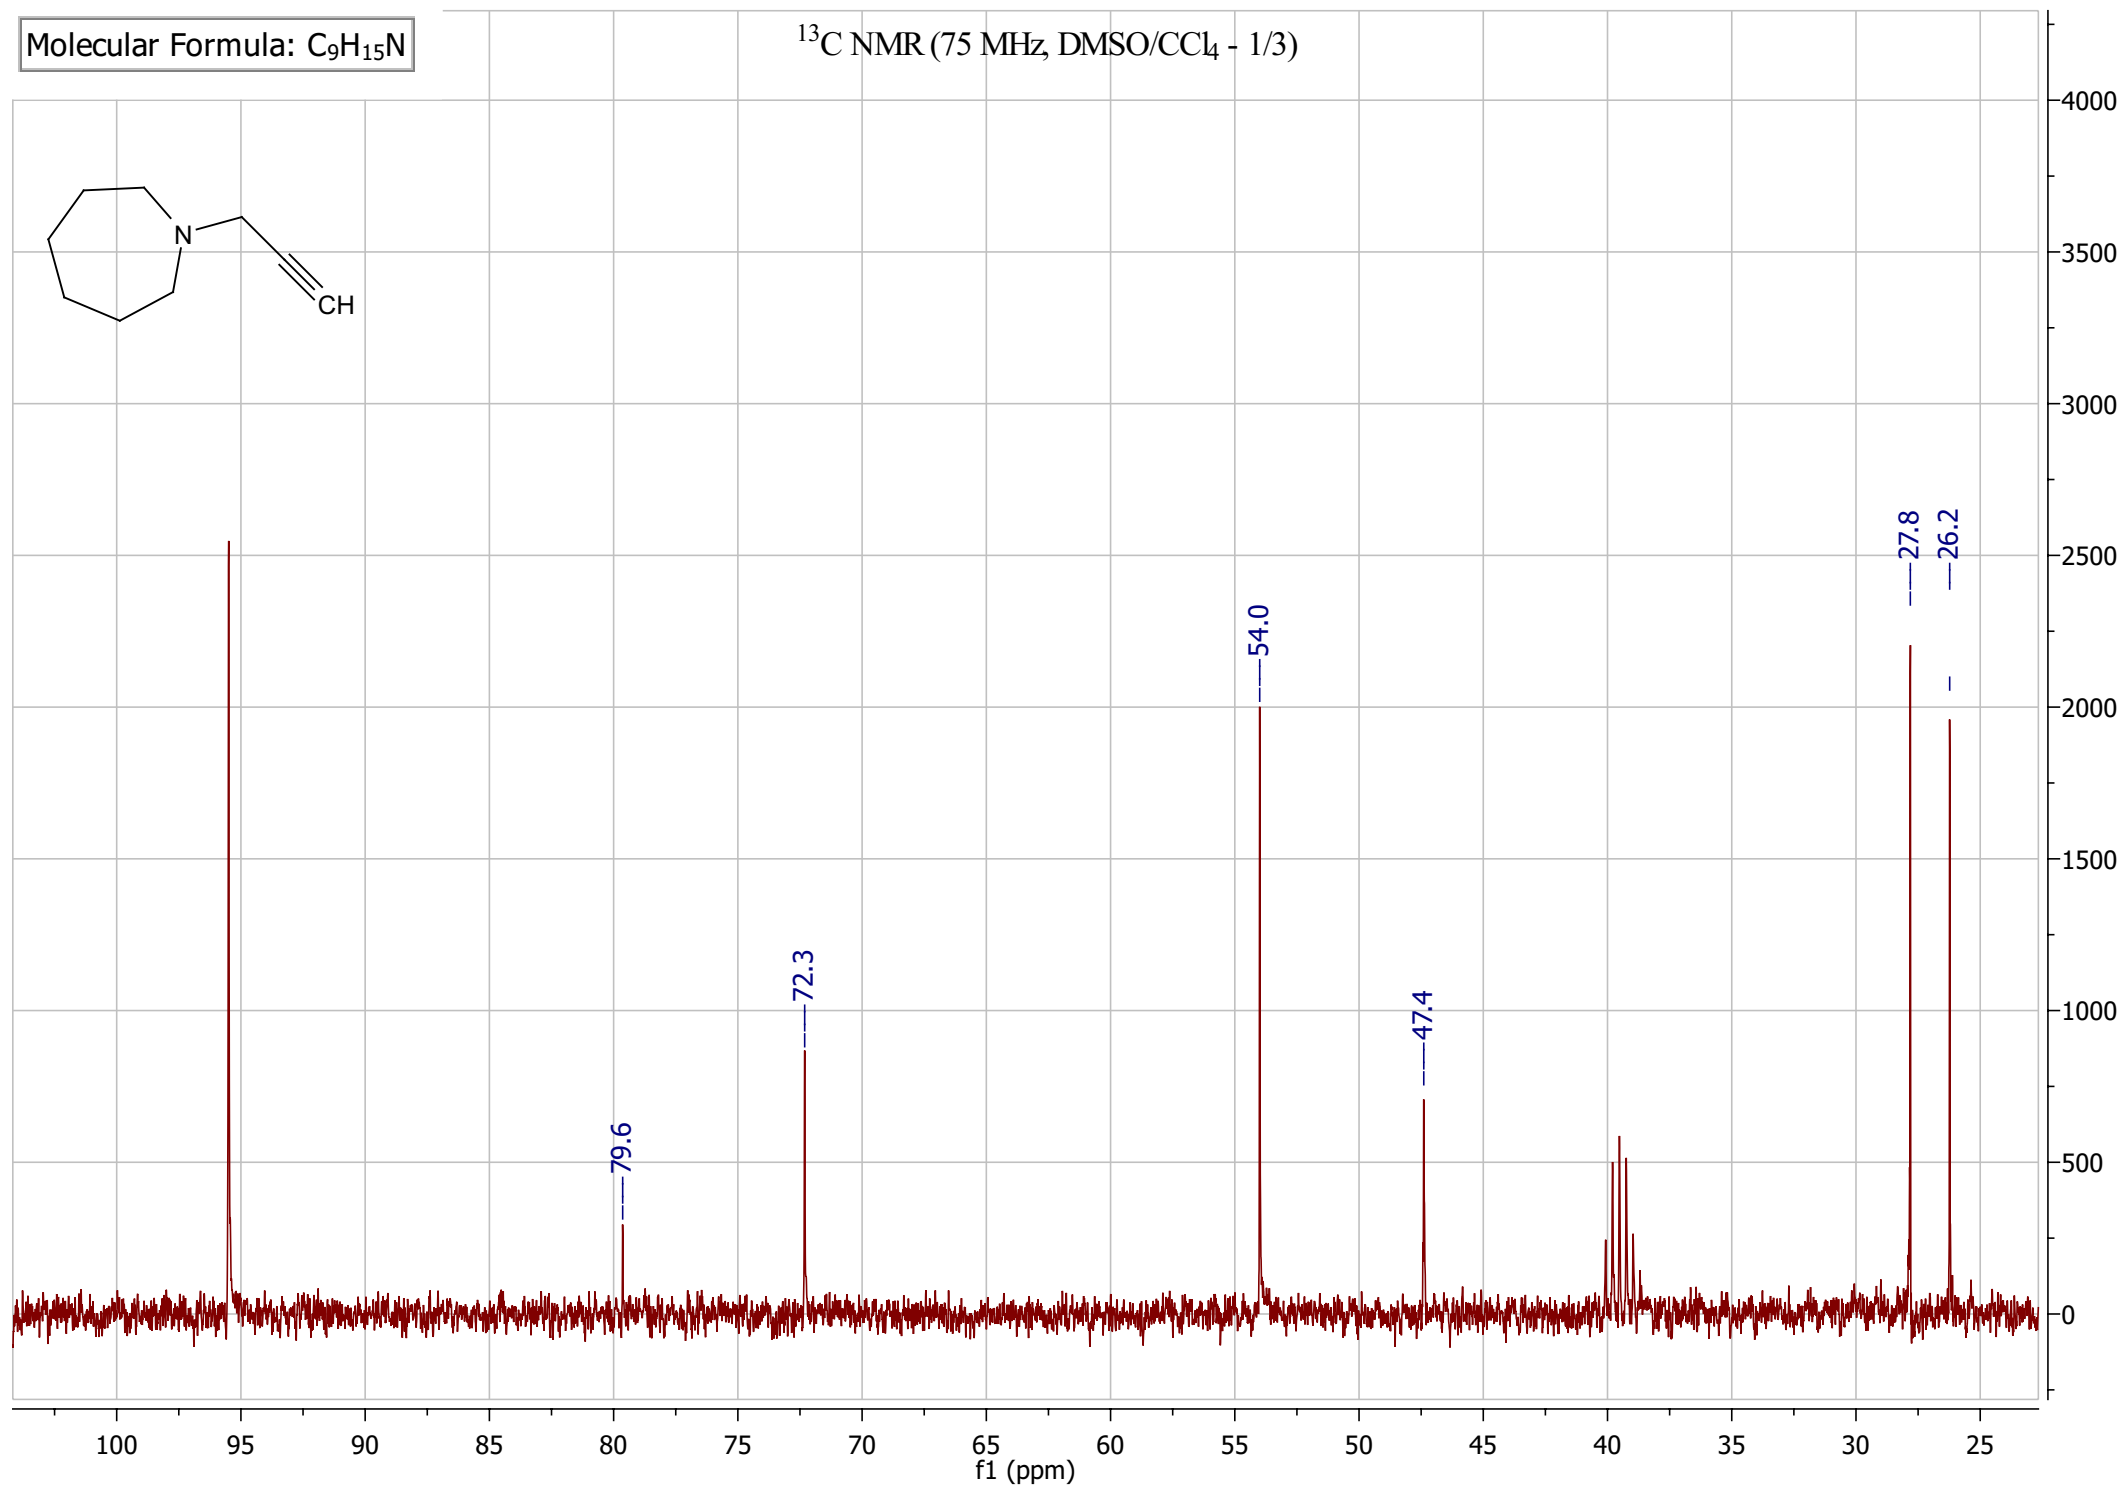

Molecular Formula: C<sub>9</sub>H<sub>15</sub>N

<sup>1</sup>H NMR (300 MHz, DMSO/CCl<sub>4</sub> - 1/3)

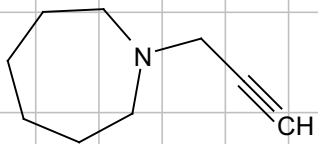

3e

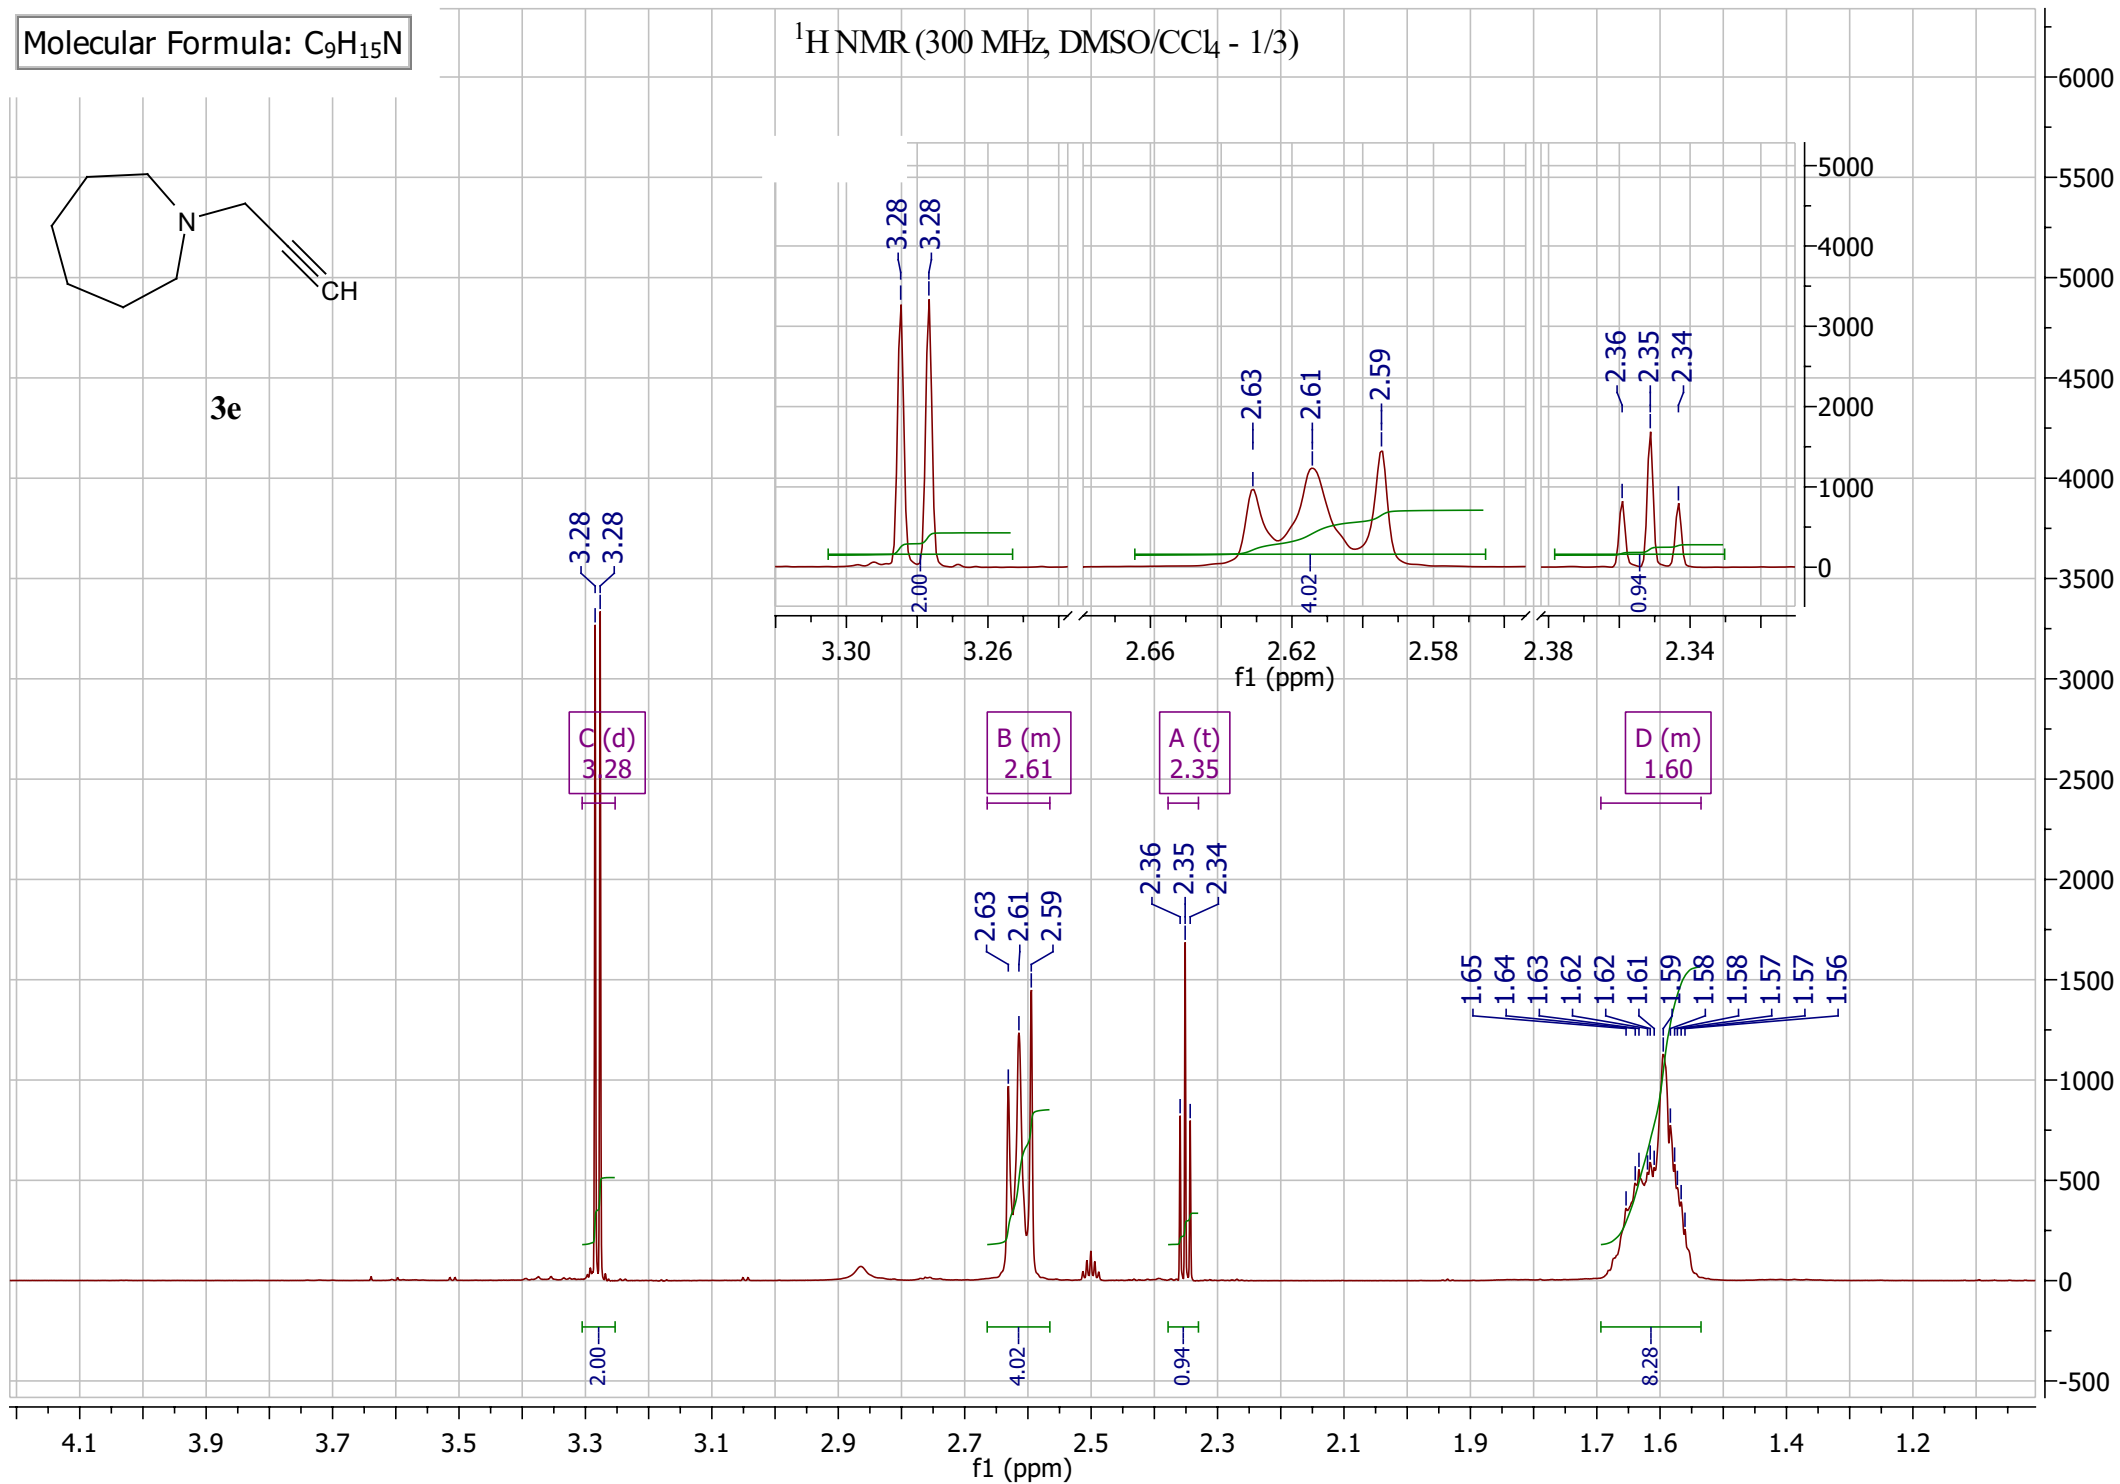

Molecular Formula: C<sub>7</sub>H<sub>7</sub>NO<sub>2</sub>

<sup>13</sup>C NMR (75 MHz, DMSO/CCl<sub>4</sub> - 1/3)

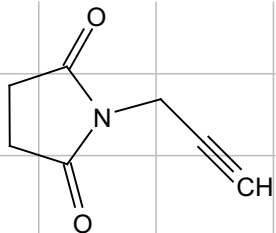

**3f**

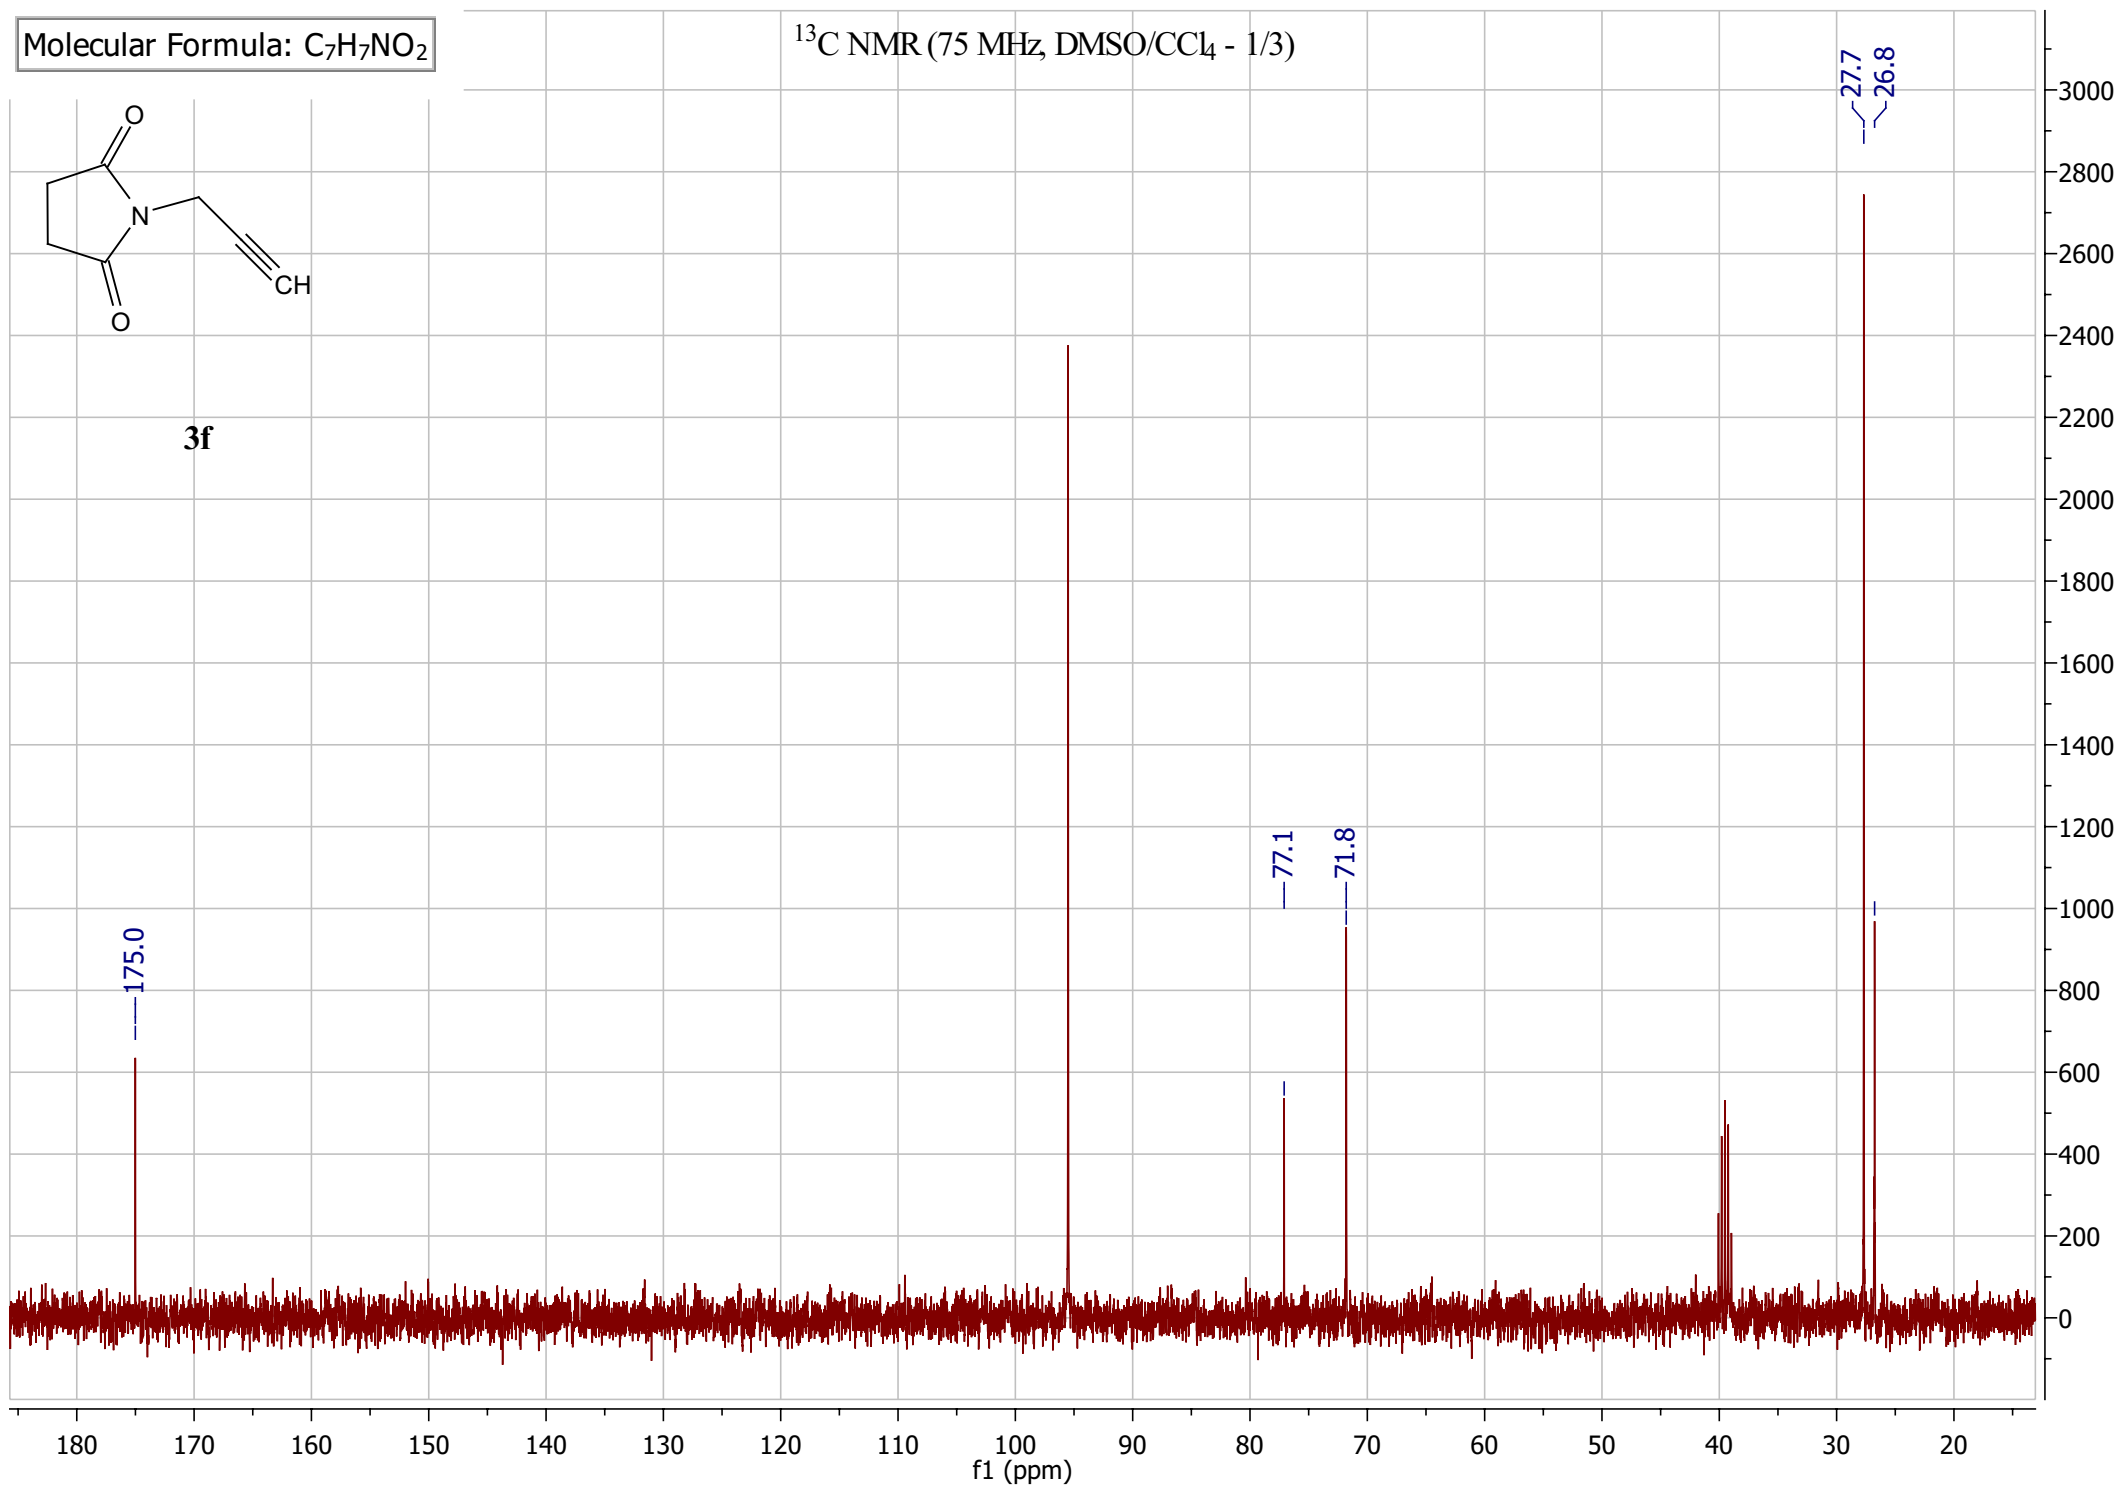

Molecular Formula: C<sub>7</sub>H<sub>7</sub>NO<sub>2</sub>

<sup>1</sup>H NMR (300 MHz, DMSO/CCl<sub>4</sub> - 1/3)

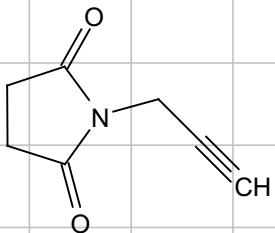

**3f**

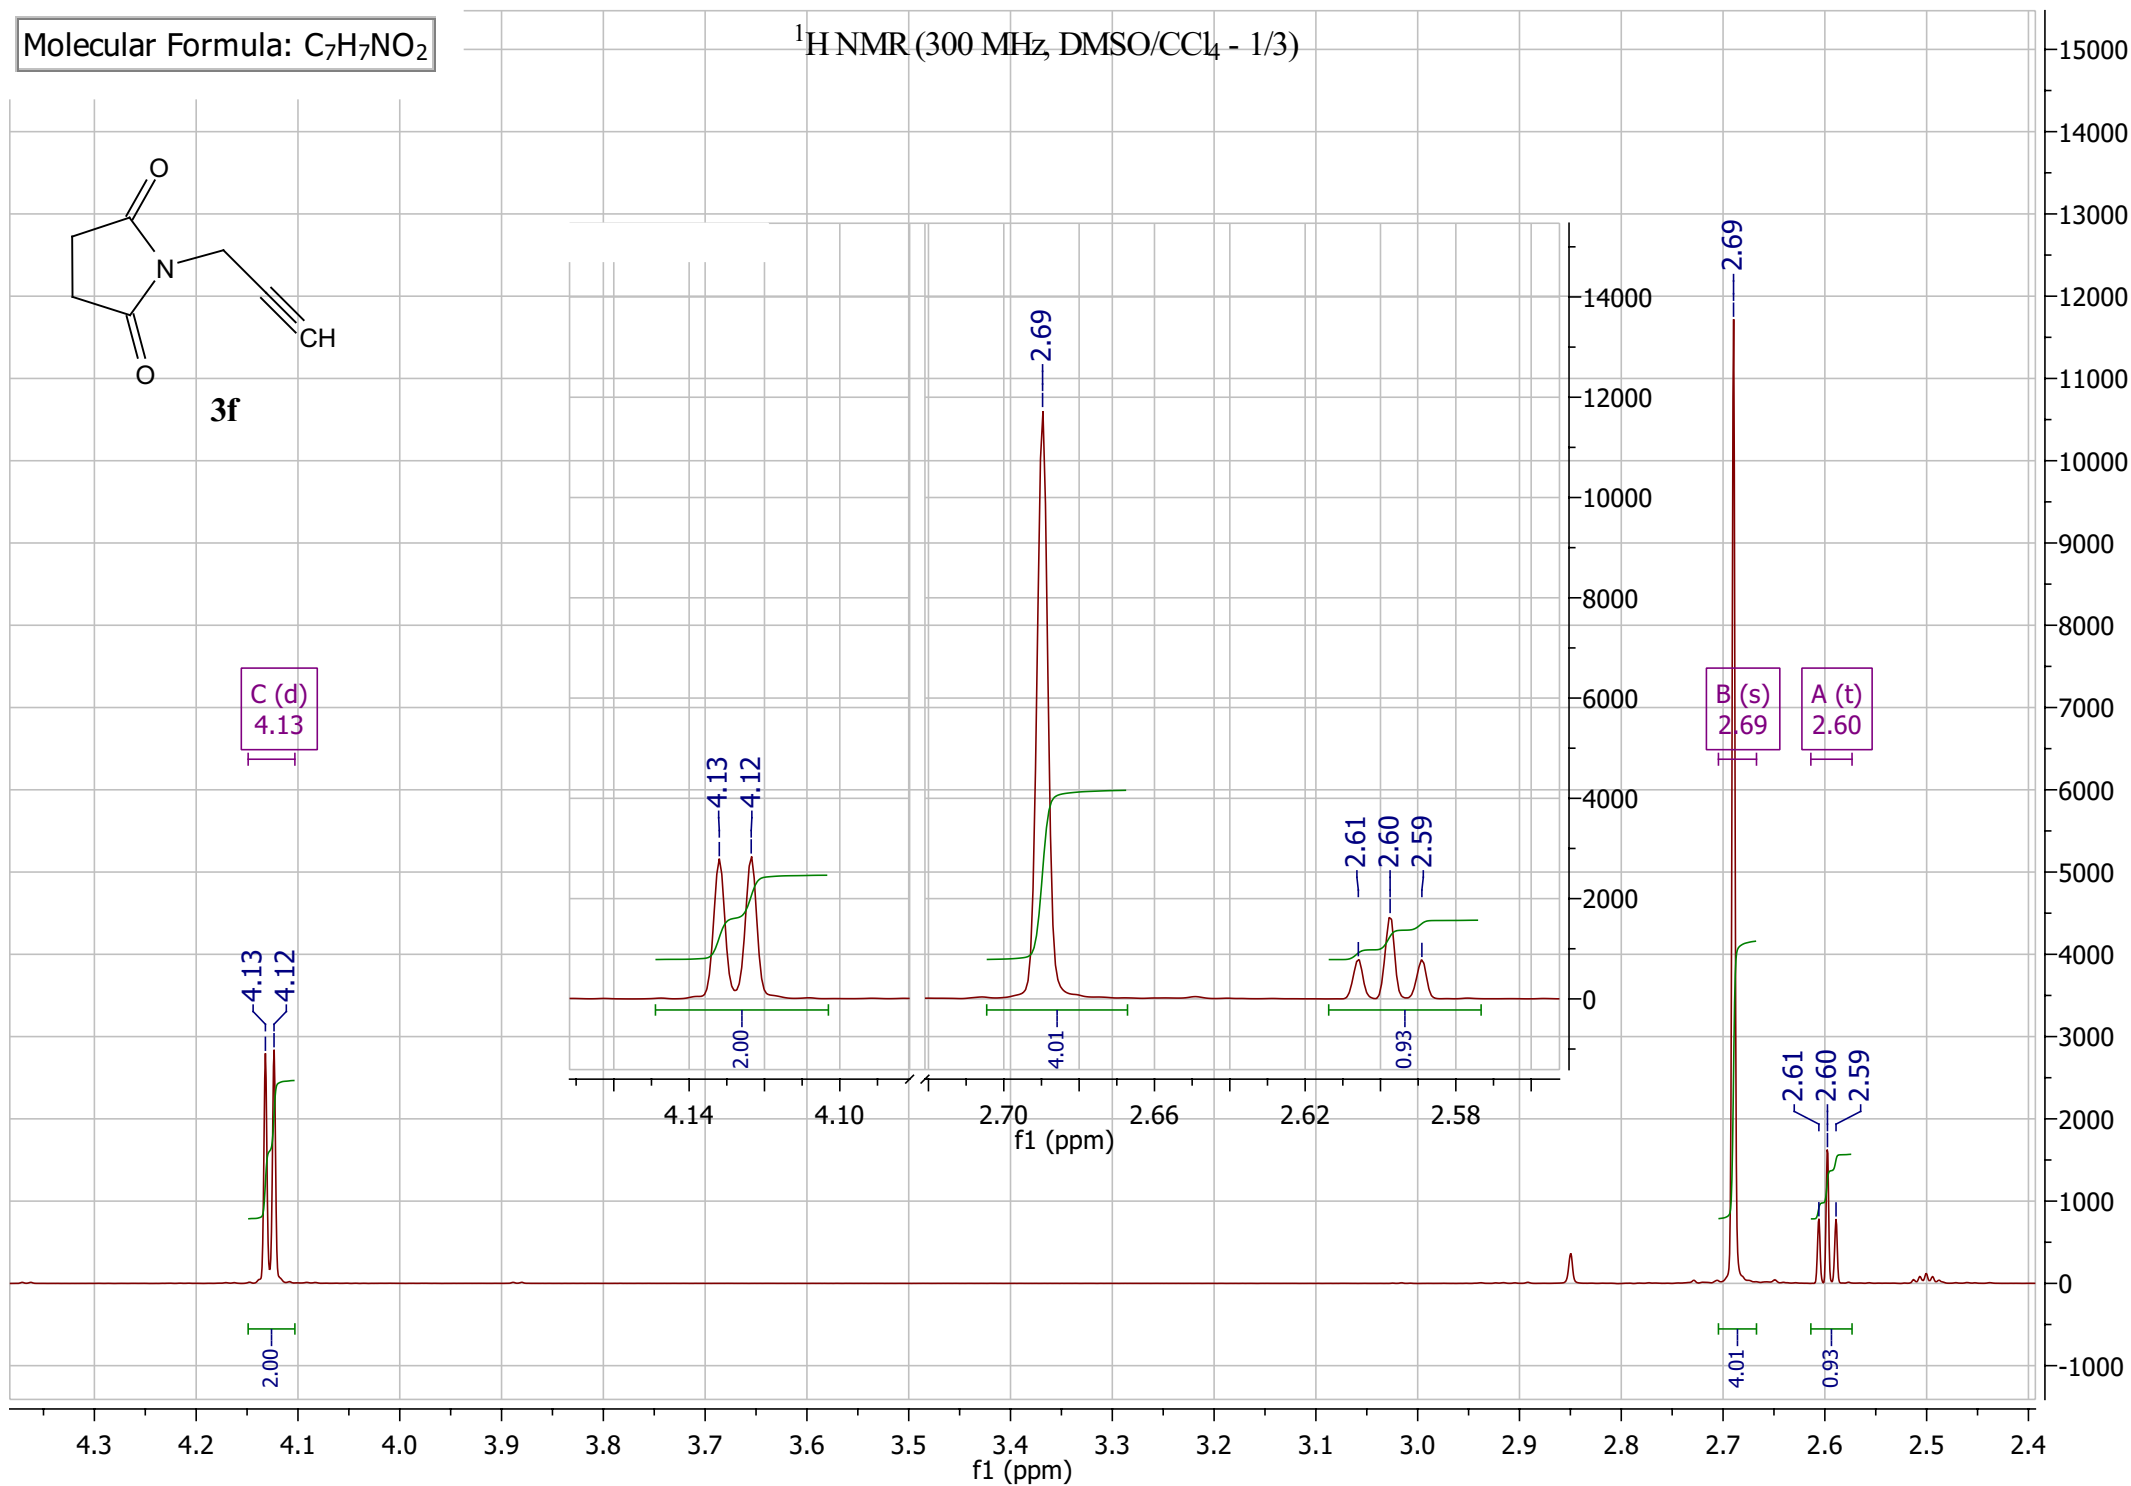



Molecular Formula: C<sub>11</sub>H<sub>7</sub>NO<sub>2</sub>

<sup>13</sup>C NMR (75 MHz, DMSO/CCl<sub>4</sub> - 1/3)

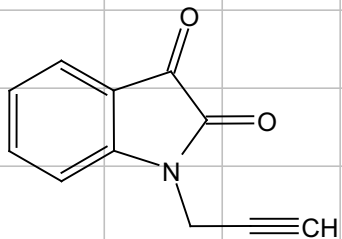

3g

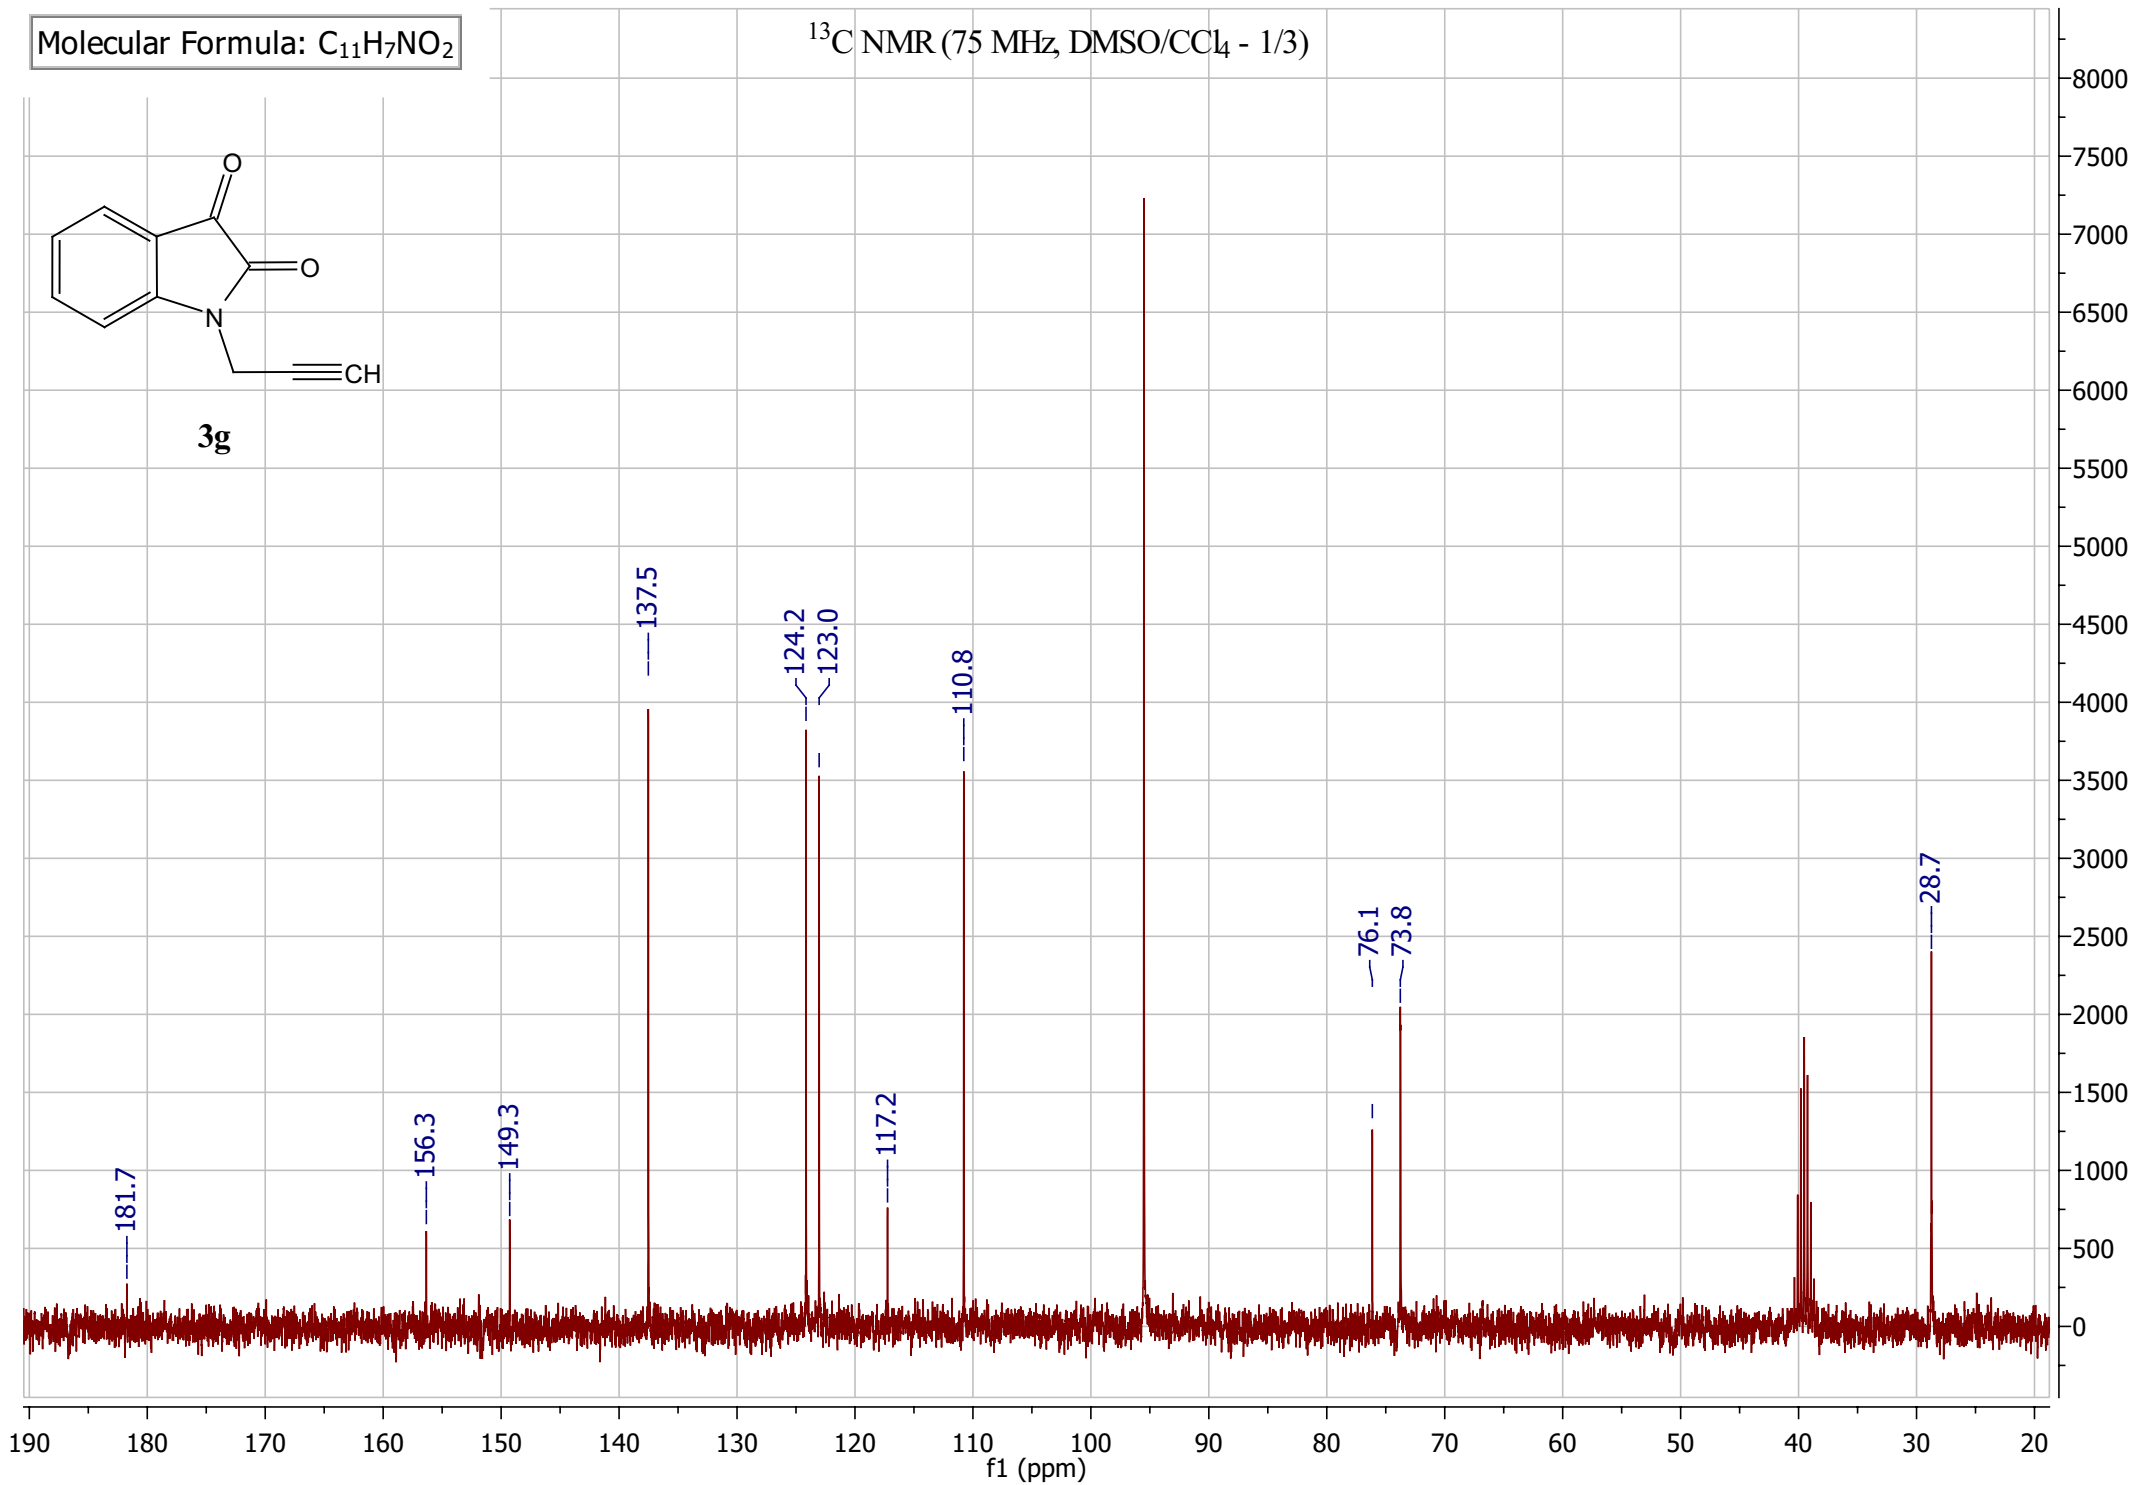

Molecular Formula: C<sub>11</sub>H<sub>7</sub>NO<sub>2</sub>

<sup>1</sup>H NMR (300 MHz, DMSO/CCl<sub>4</sub> - 1/3)

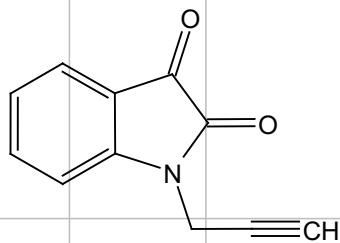

3g

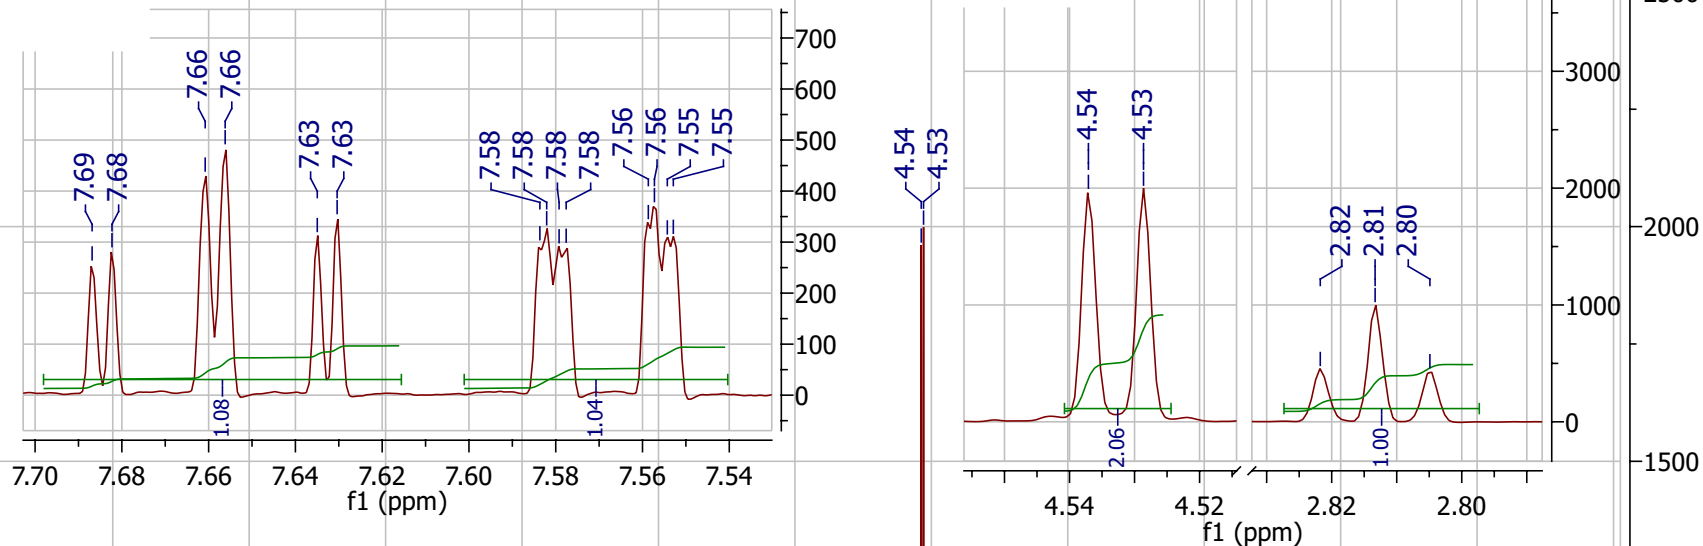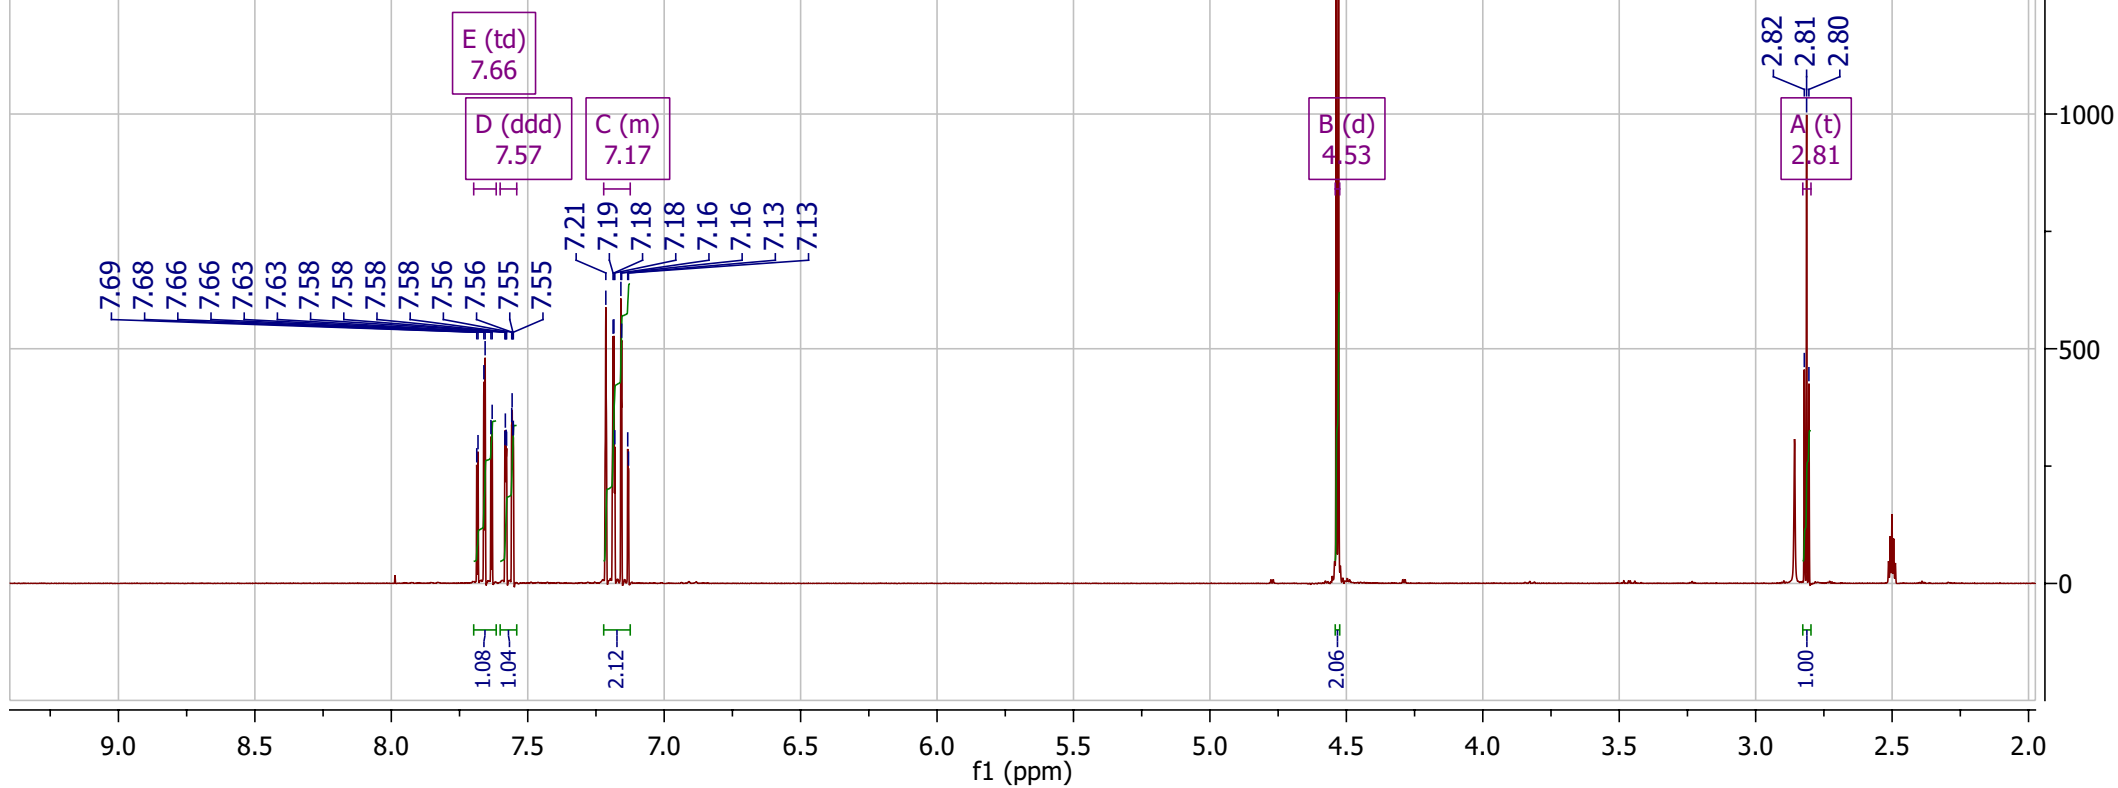

Molecular Formula: C<sub>11</sub>H<sub>7</sub>NO<sub>2</sub>

<sup>13</sup>C NMR (75 MHz, DMSO/CCl<sub>4</sub> - 1/3)

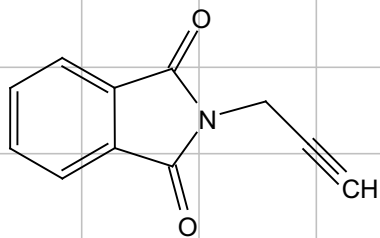

**3h**

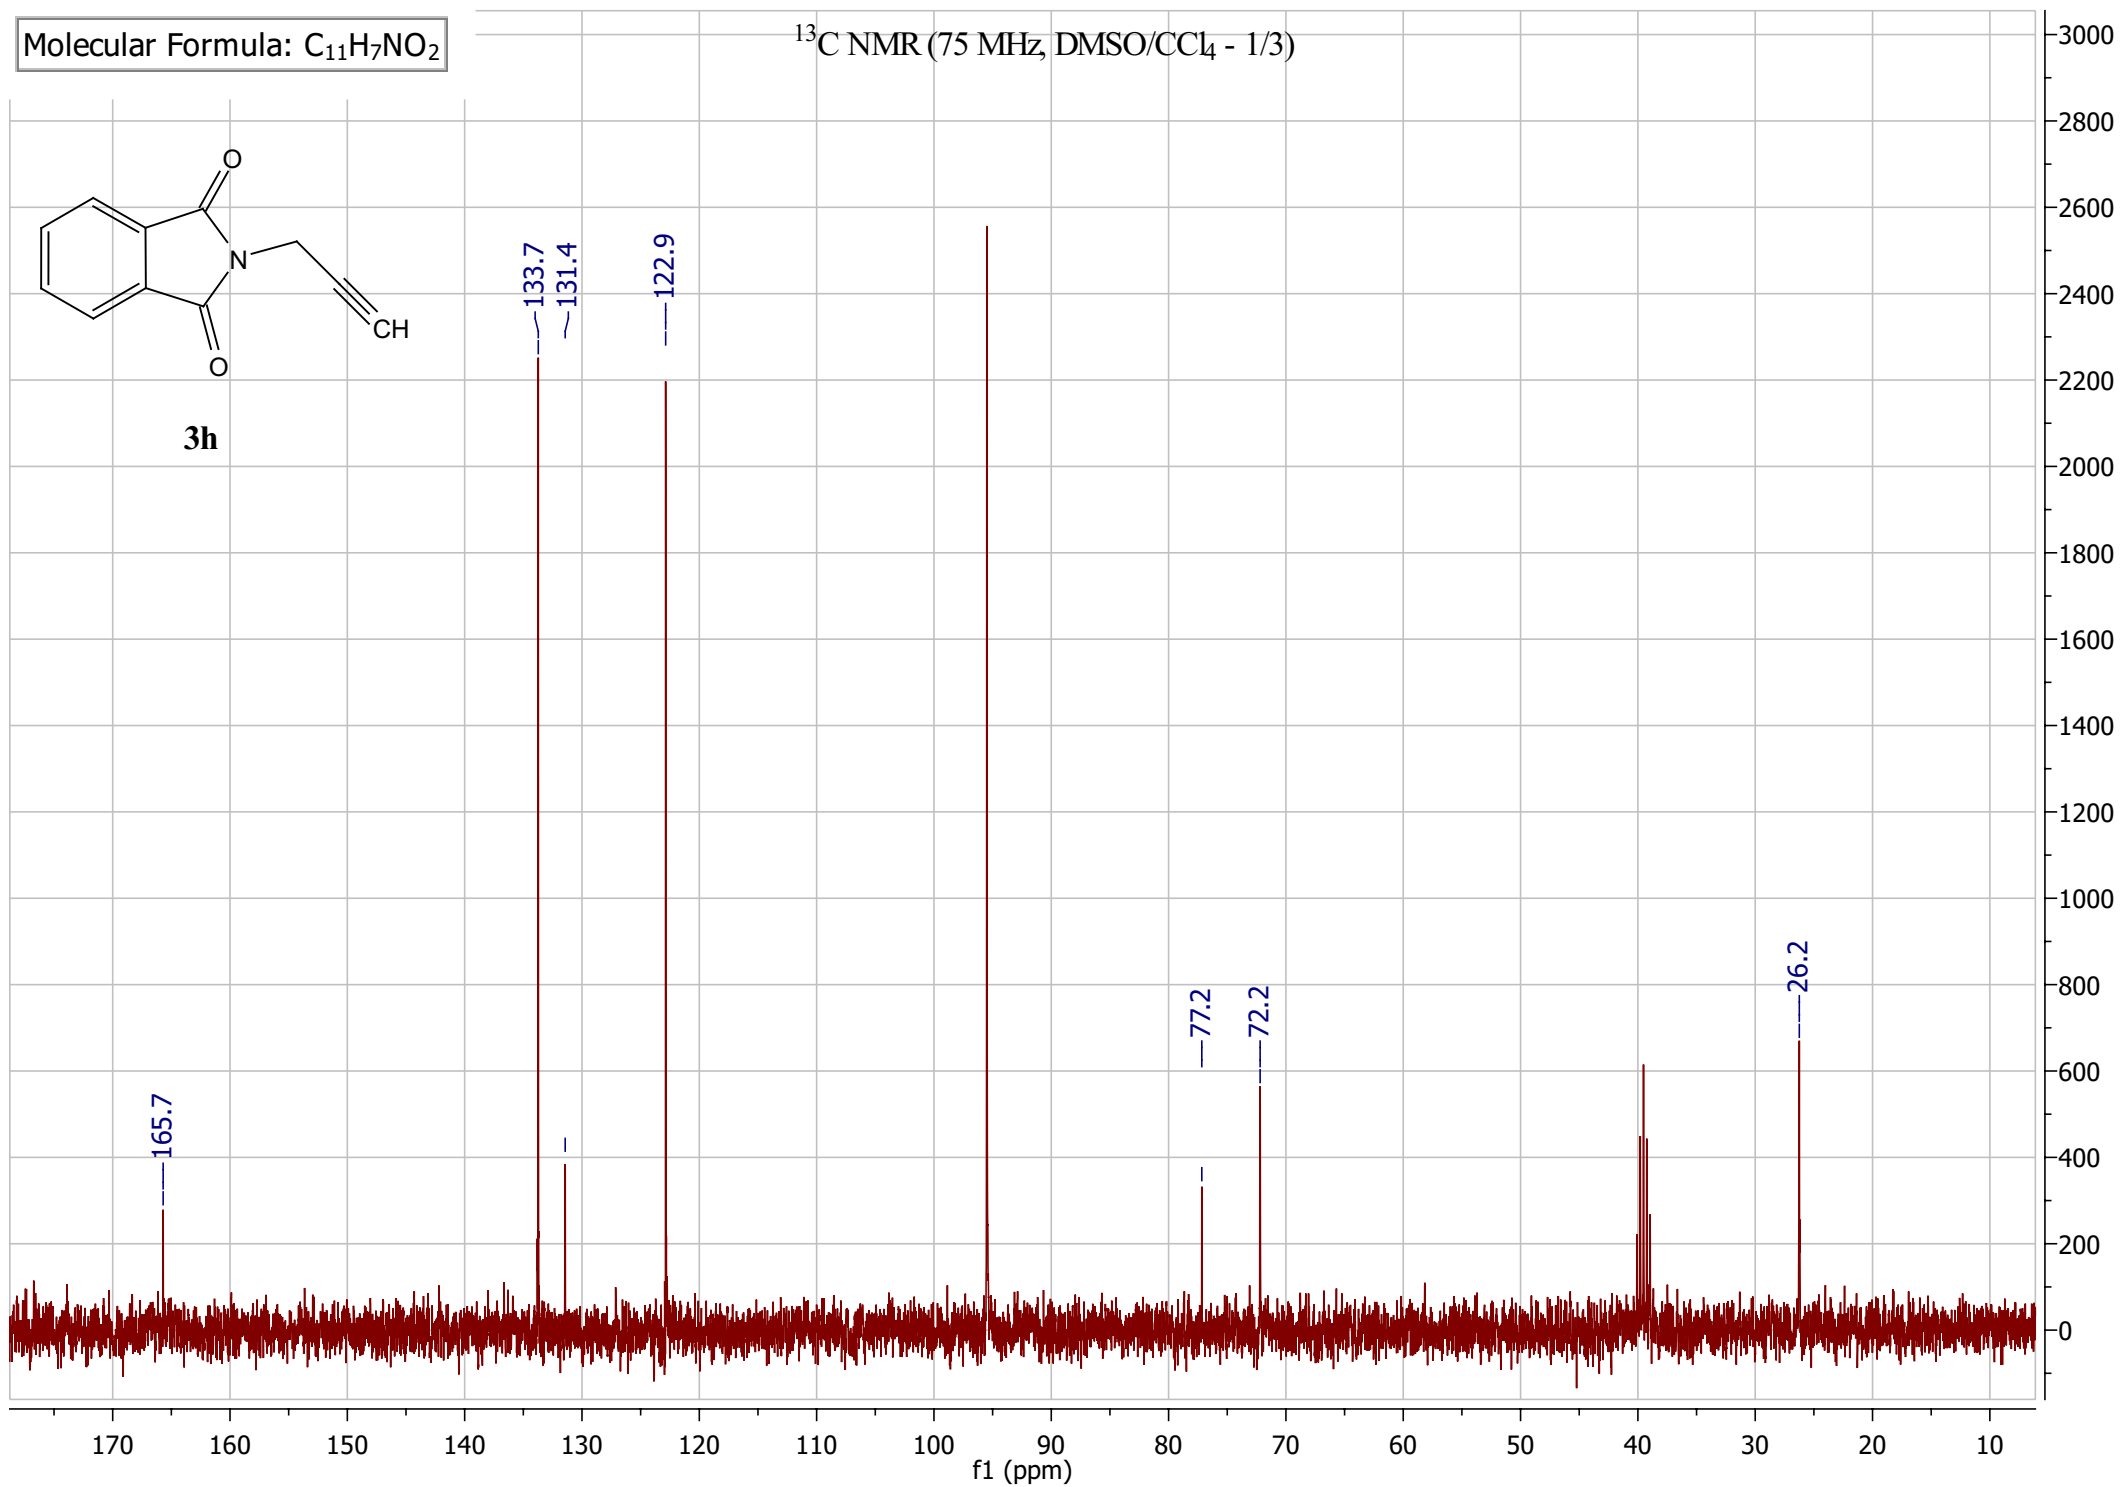

Molecular Formula: C<sub>11</sub>H<sub>7</sub>NO<sub>2</sub>

<sup>1</sup>H NMR (300 MHz, DMSO/CCl<sub>4</sub> - 1/3)

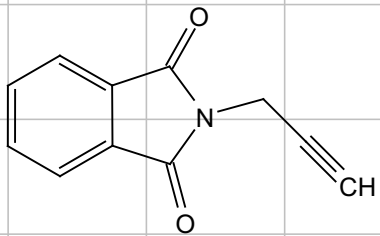

**3h**

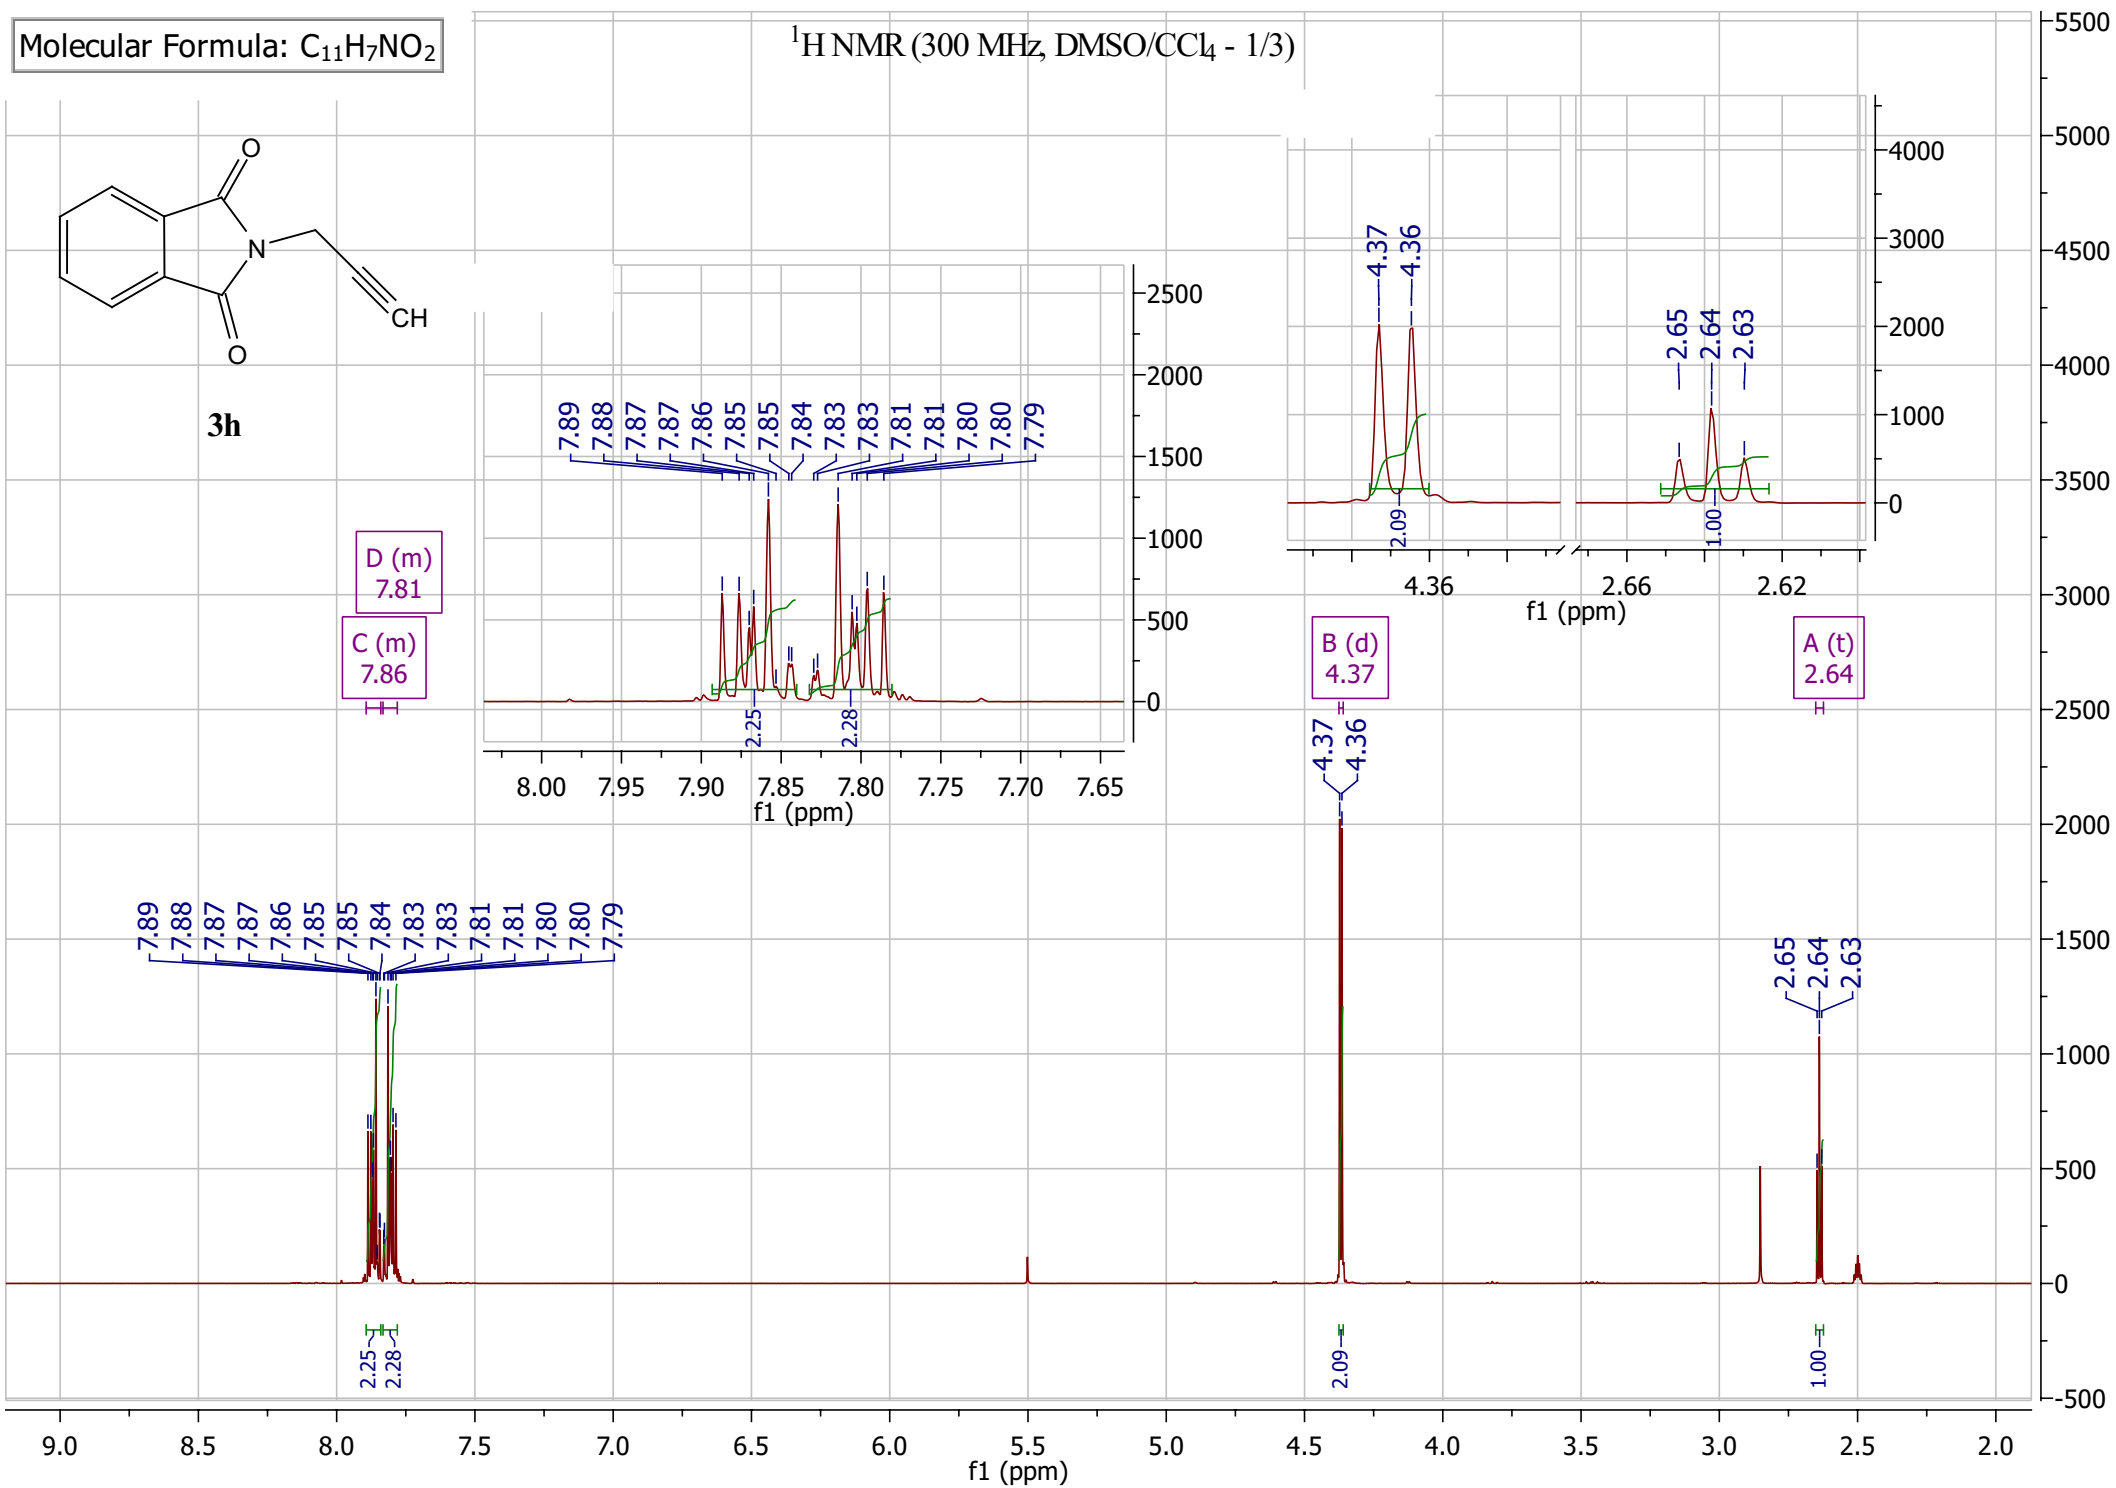

Molecular Formula: C<sub>9</sub>H<sub>7</sub>N<sub>3</sub>

<sup>13</sup>C NMR (75 MHz, DMSO/CCl<sub>4</sub> - 1/3)

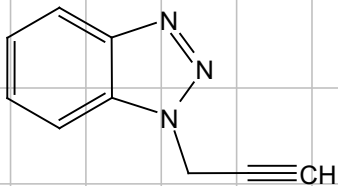

3i

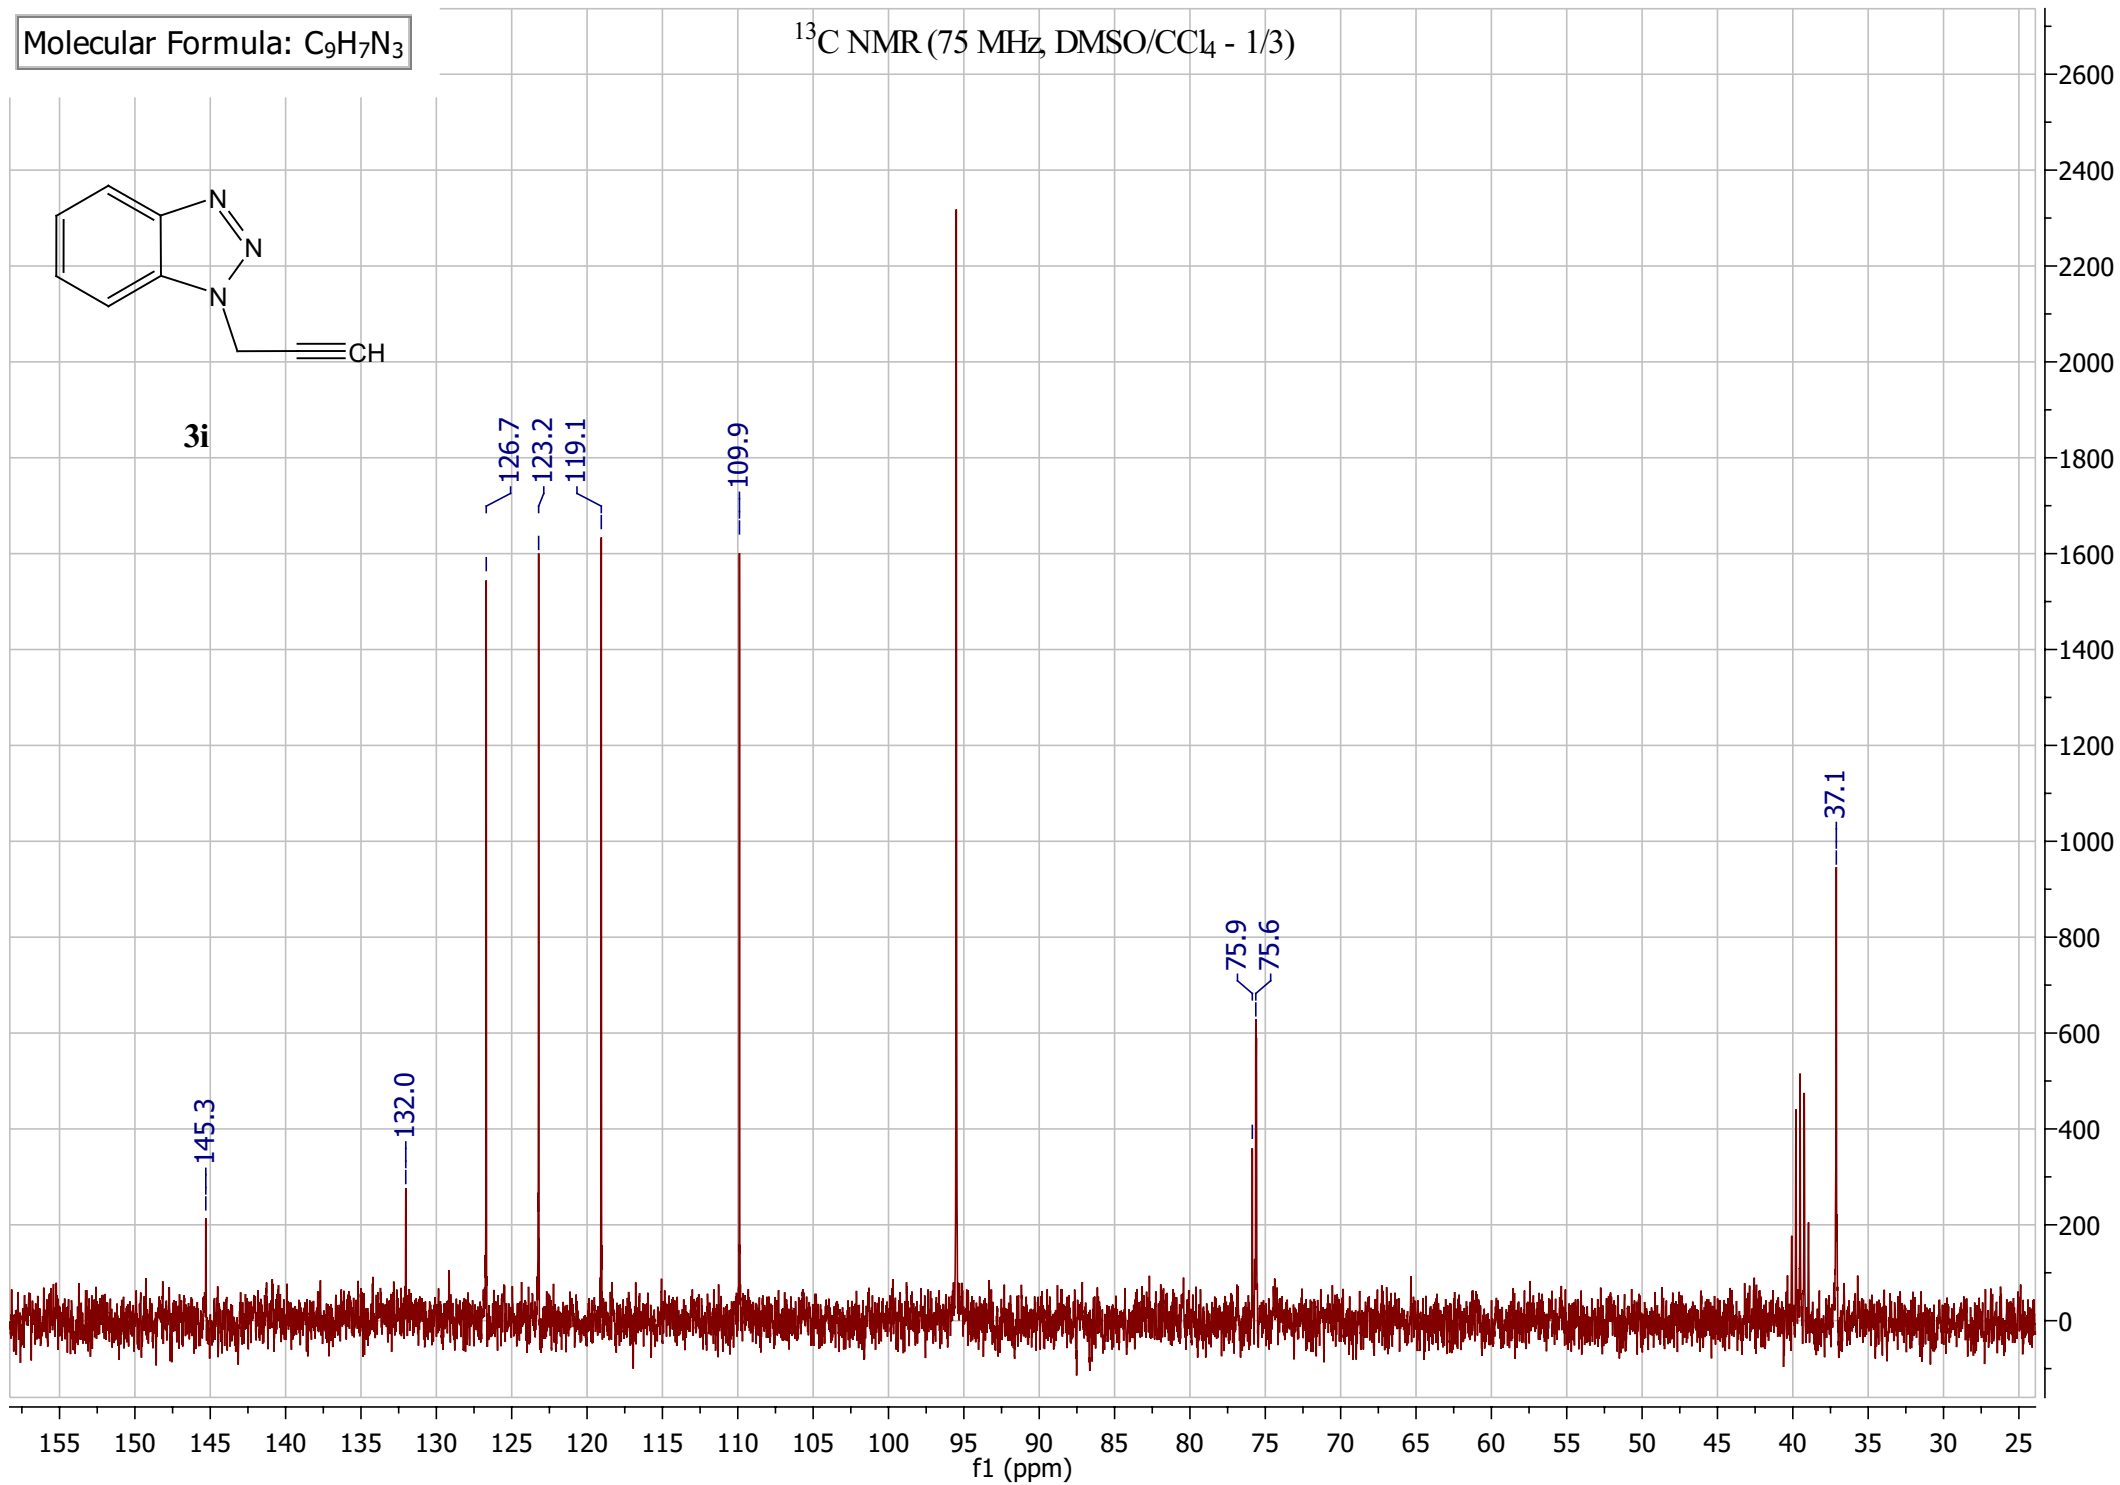

Molecular Formula: C<sub>9</sub>H<sub>7</sub>N<sub>3</sub>

<sup>1</sup>H NMR (300 MHz, DMSO-*d*<sub>6</sub>/CCl<sub>4</sub> - 1/3)

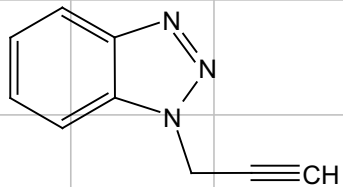

**3i**

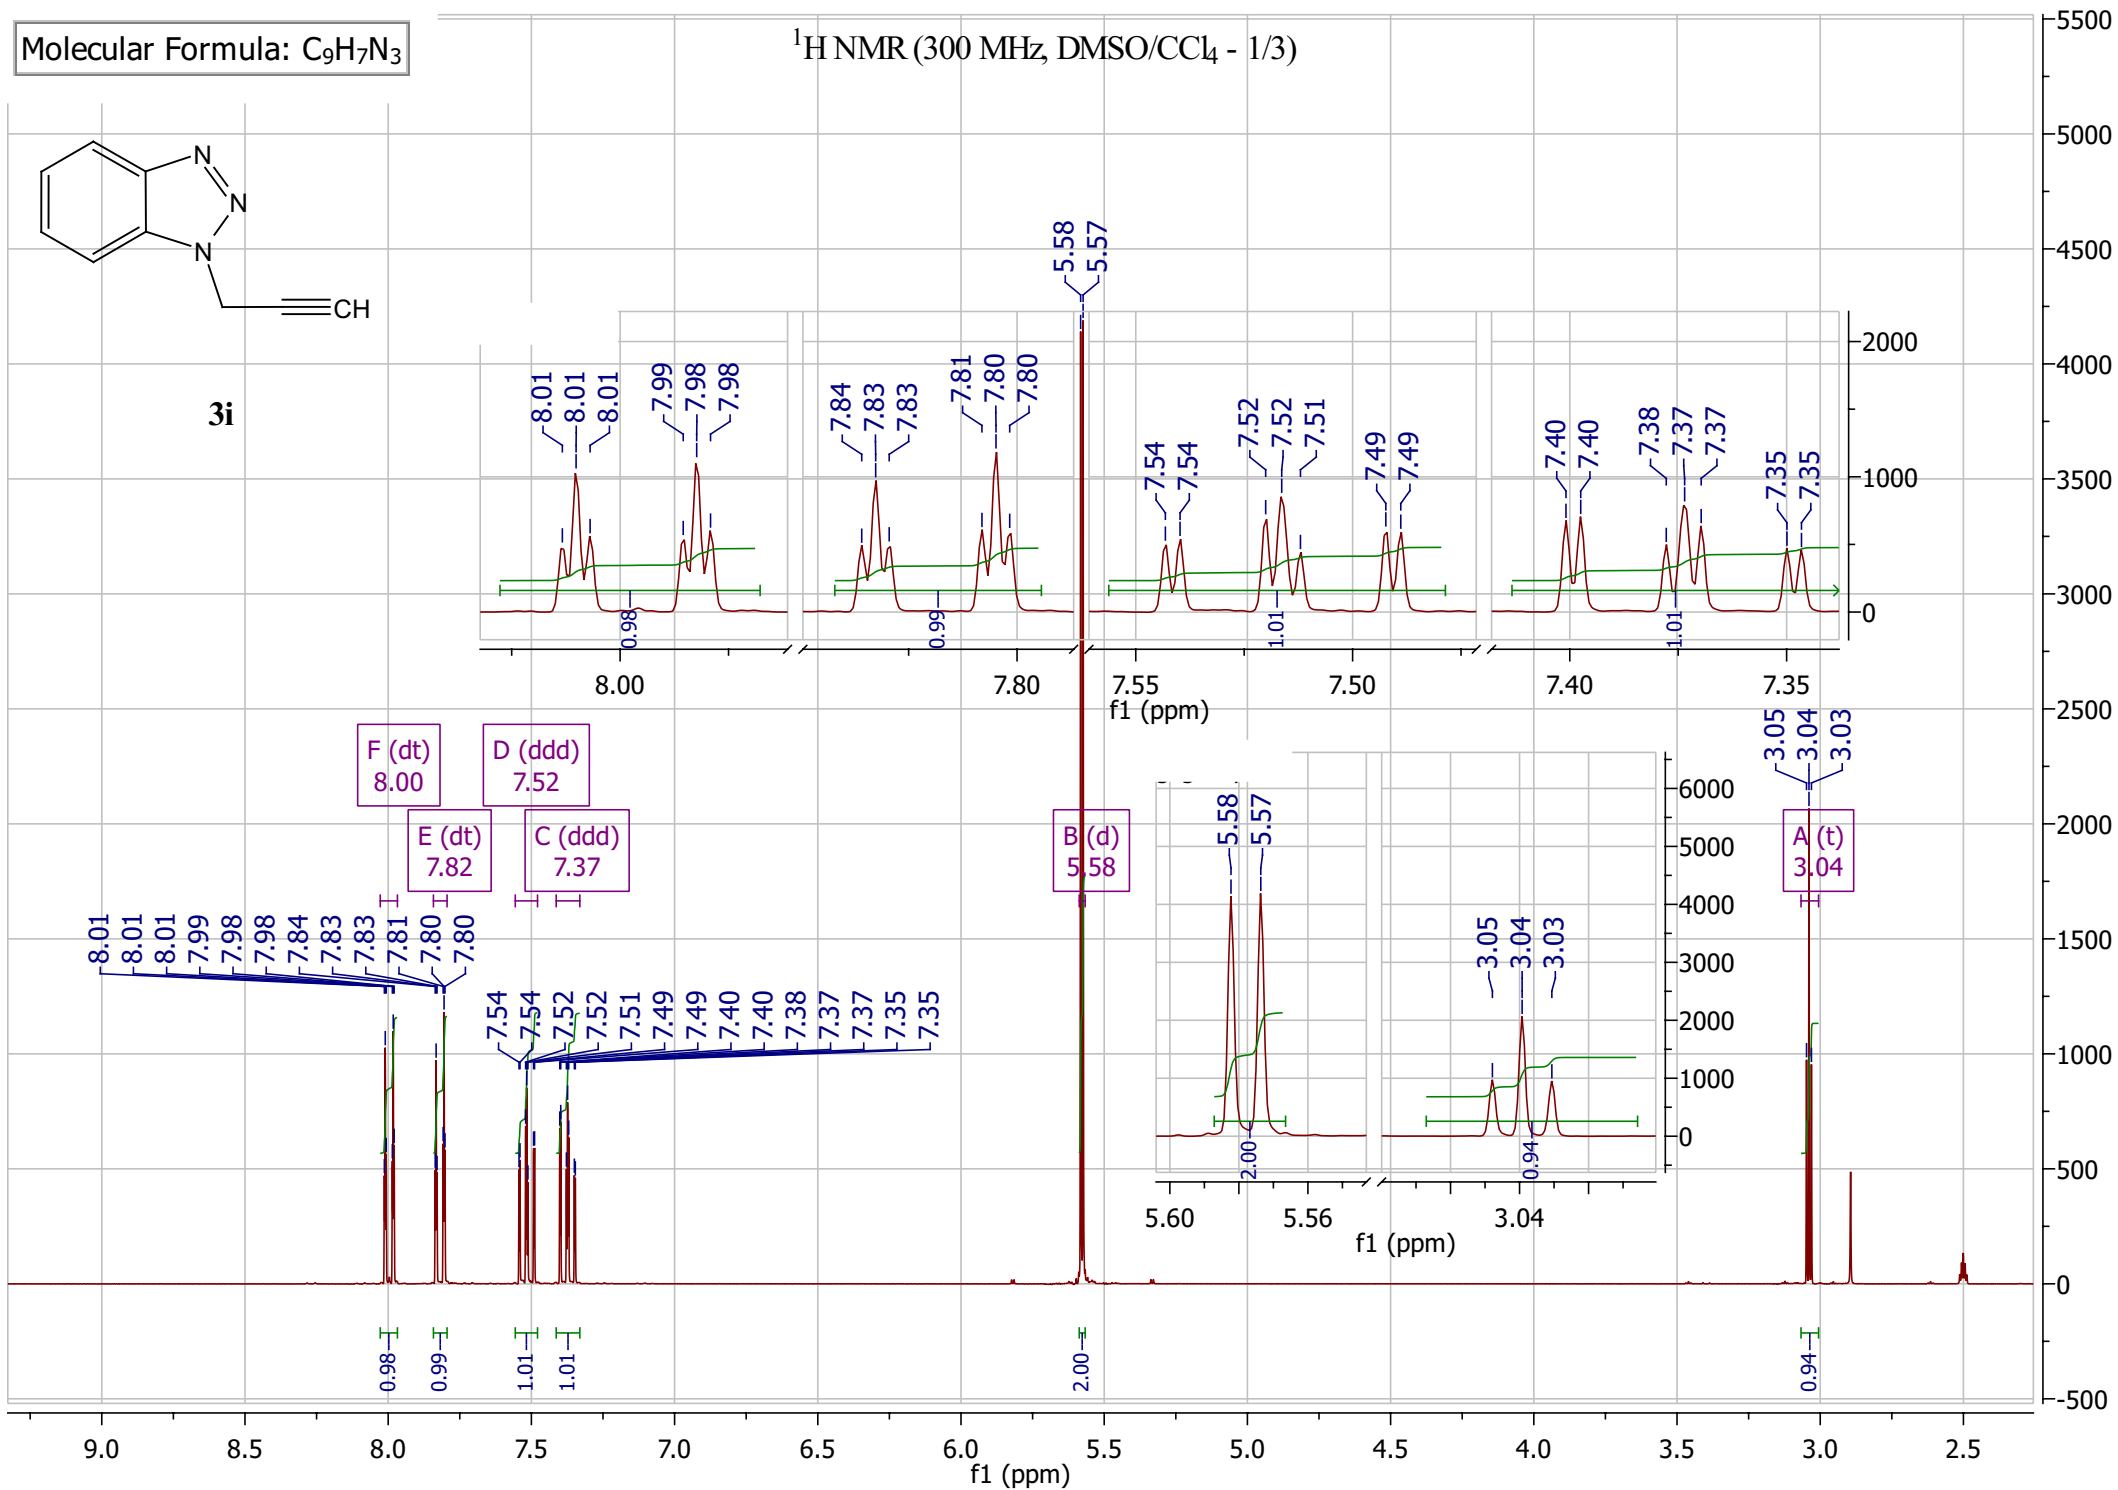

Molecular Formula: C<sub>10</sub>H<sub>13</sub>N<sub>3</sub>O

<sup>13</sup>C NMR (75 MHz, DMSO/CCl<sub>4</sub> - 1/3)

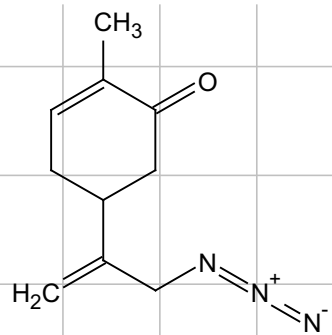

**10-N<sub>3</sub>-Car.**

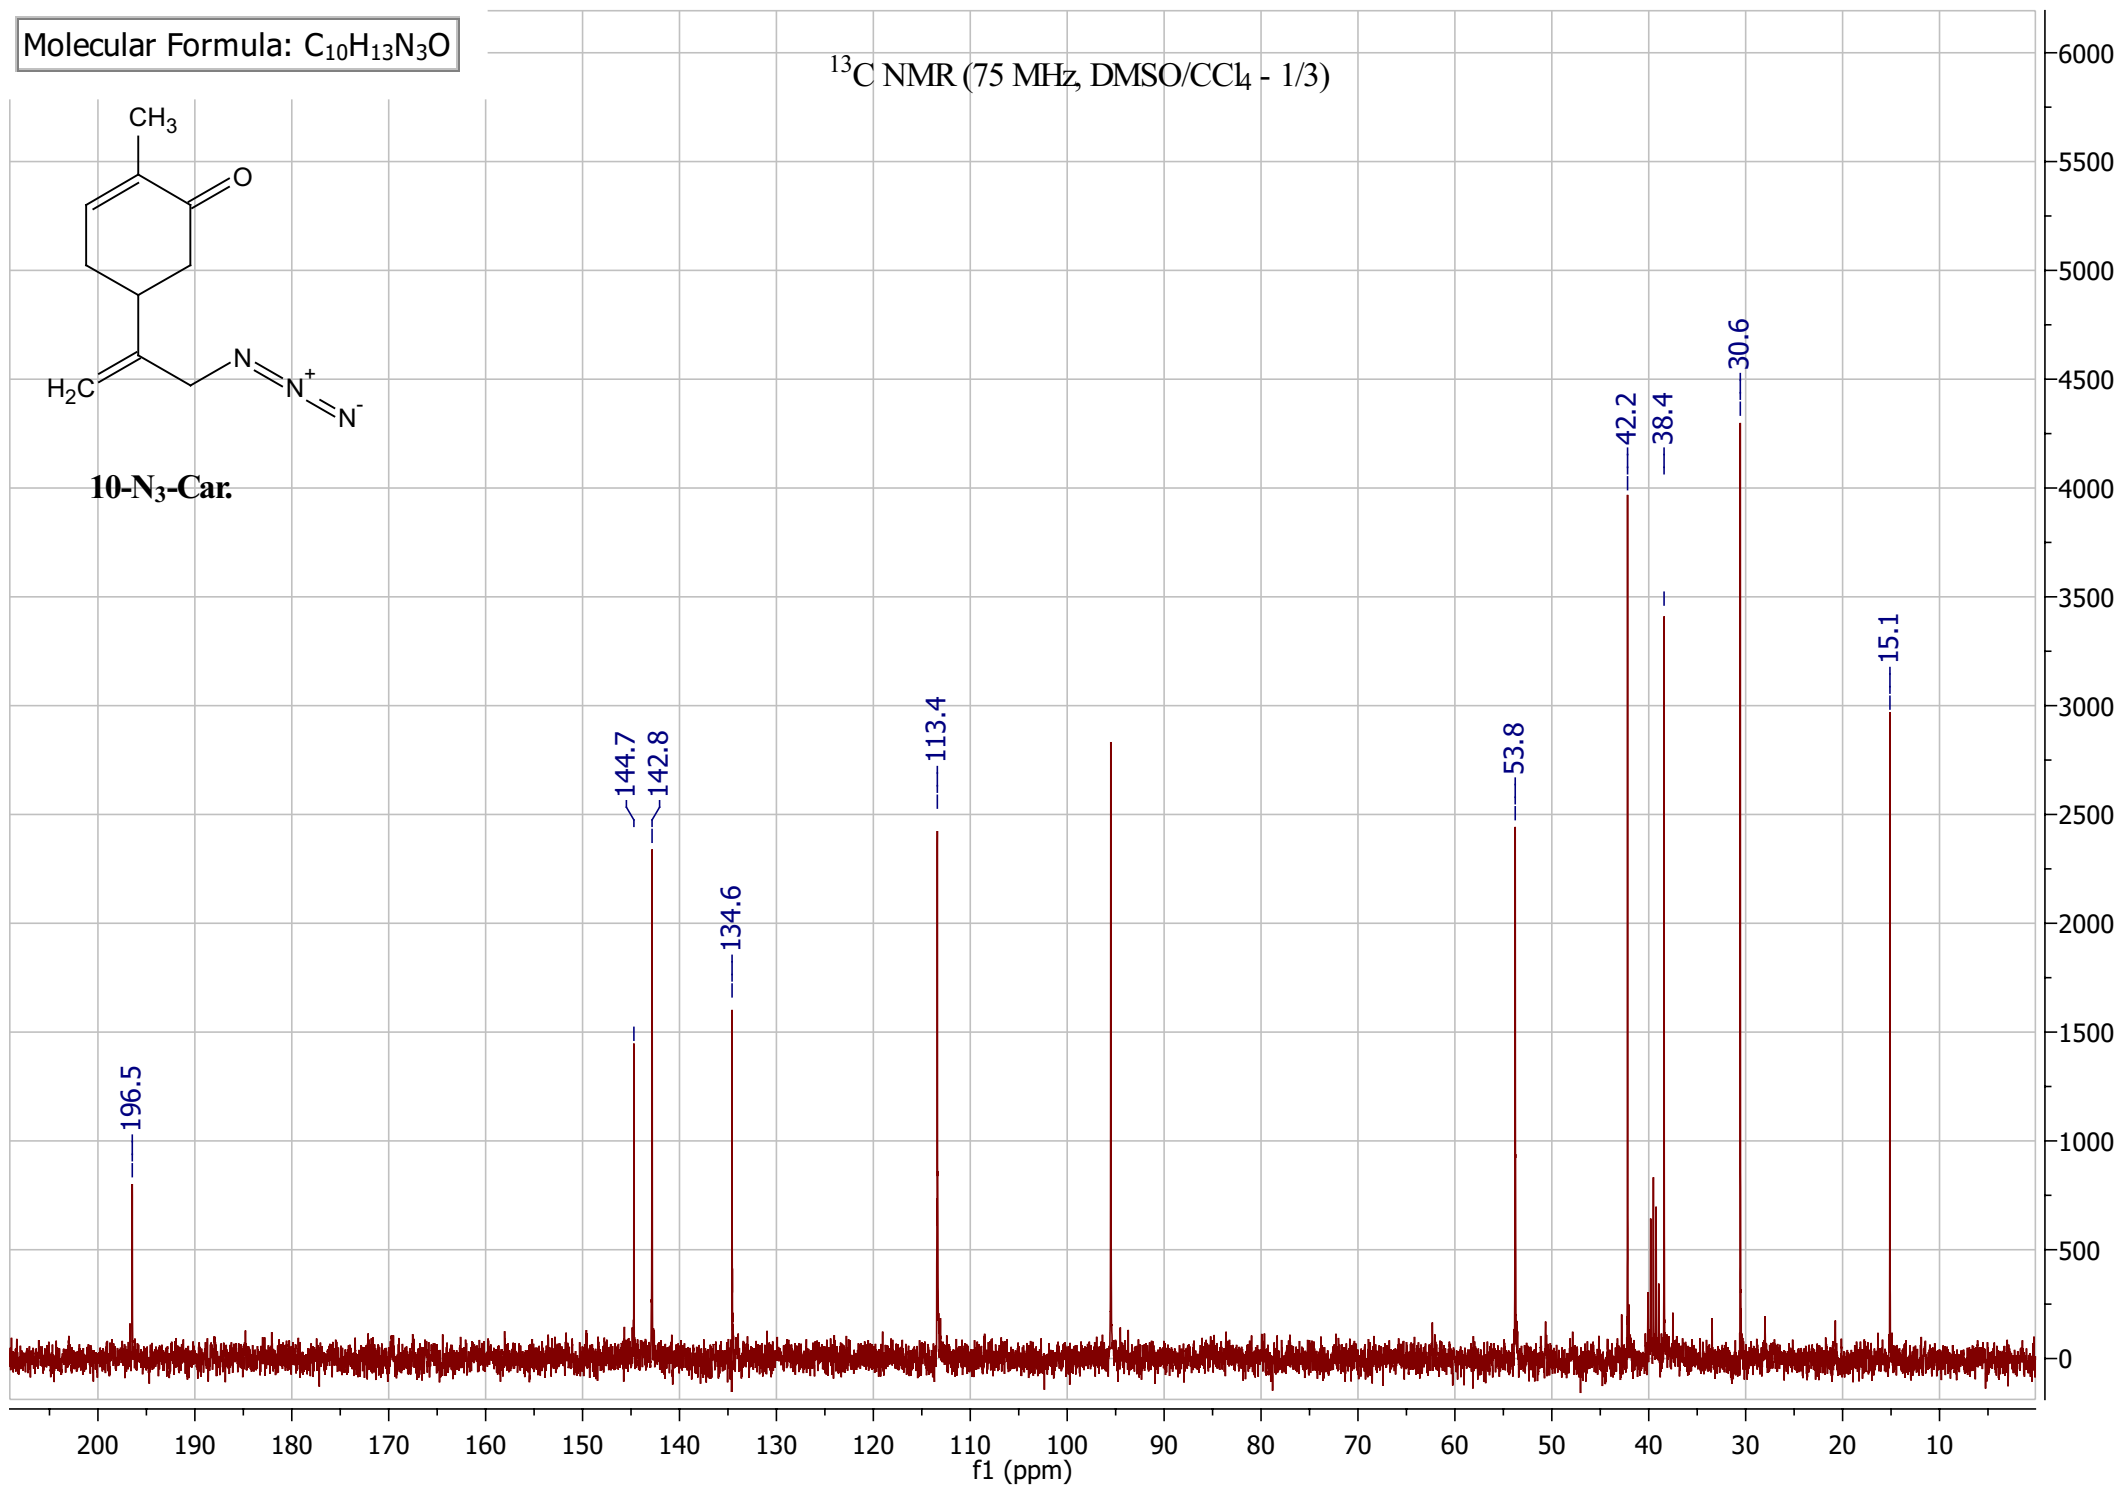

Molecular Formula: C<sub>10</sub>H<sub>13</sub>N<sub>3</sub>O

<sup>1</sup>H NMR (300 MHz, DMSO/CCl<sub>4</sub> - 1/.3)

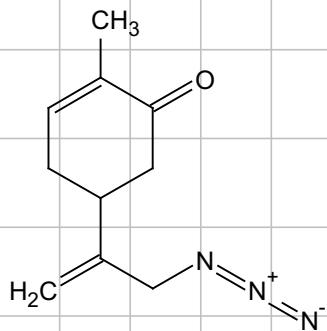

10-N<sub>3</sub>-Car.

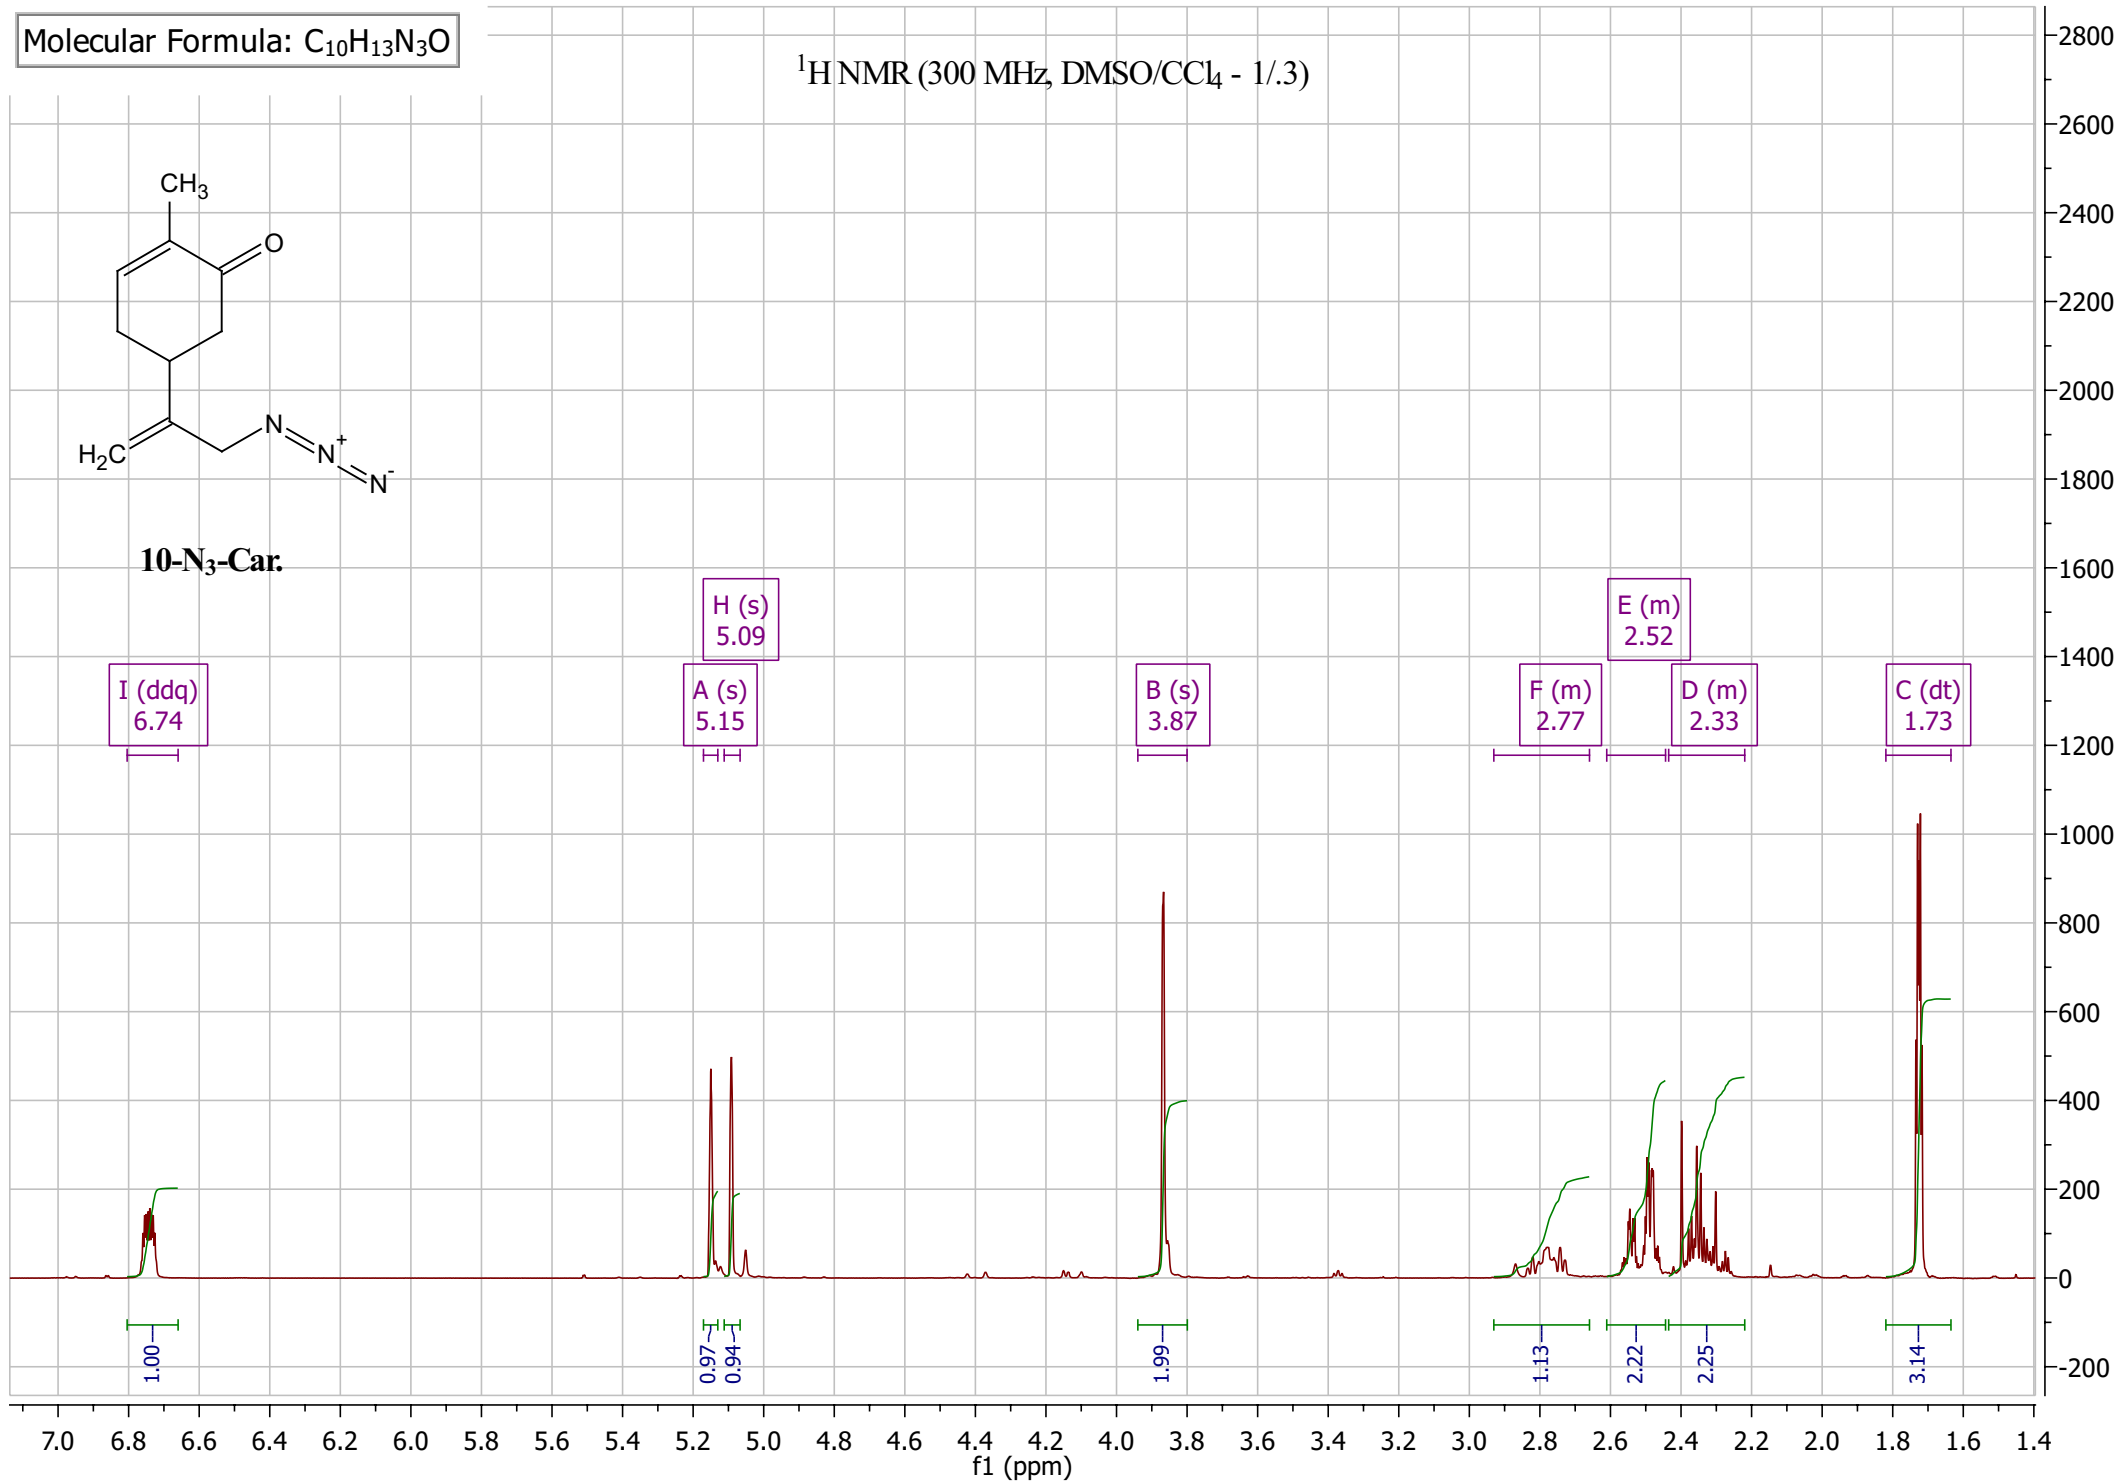



Molecular Formula: C<sub>17</sub>H<sub>24</sub>N<sub>4</sub>O<sub>2</sub>

<sup>1</sup>H NMR (400 MHz, CDCl<sub>3</sub>)

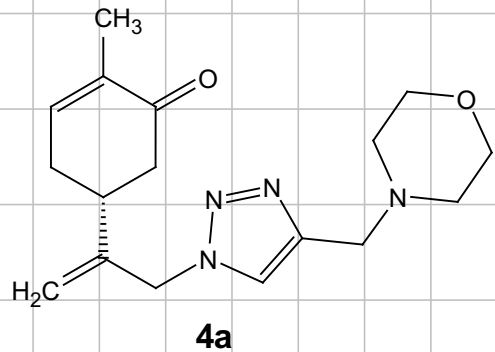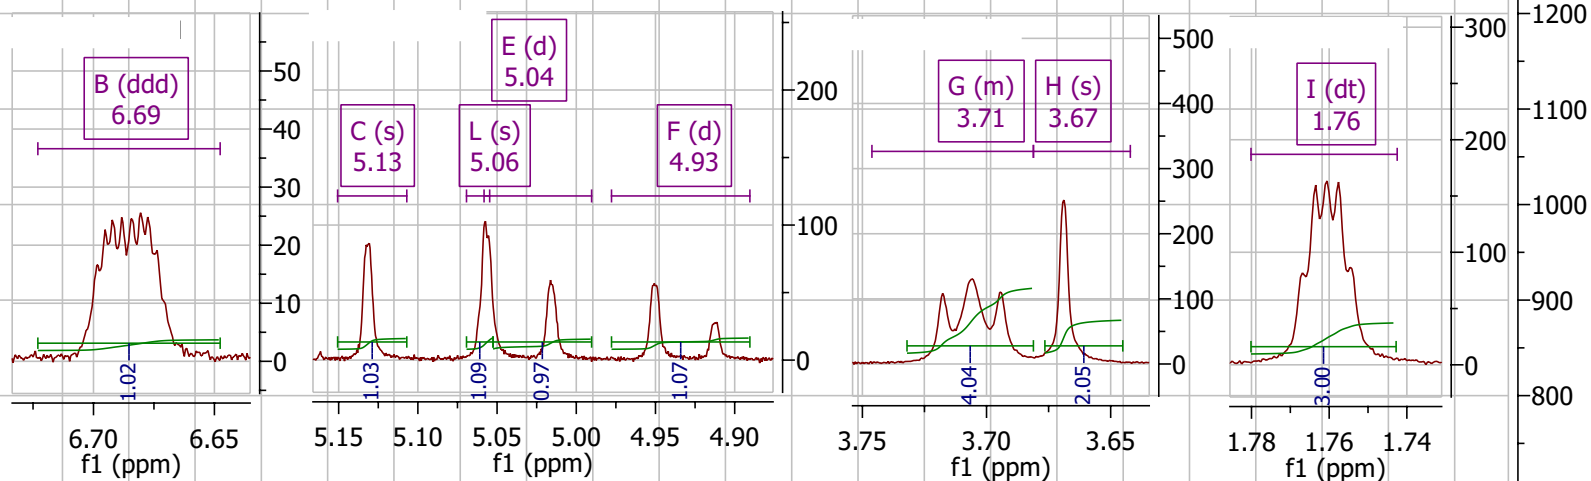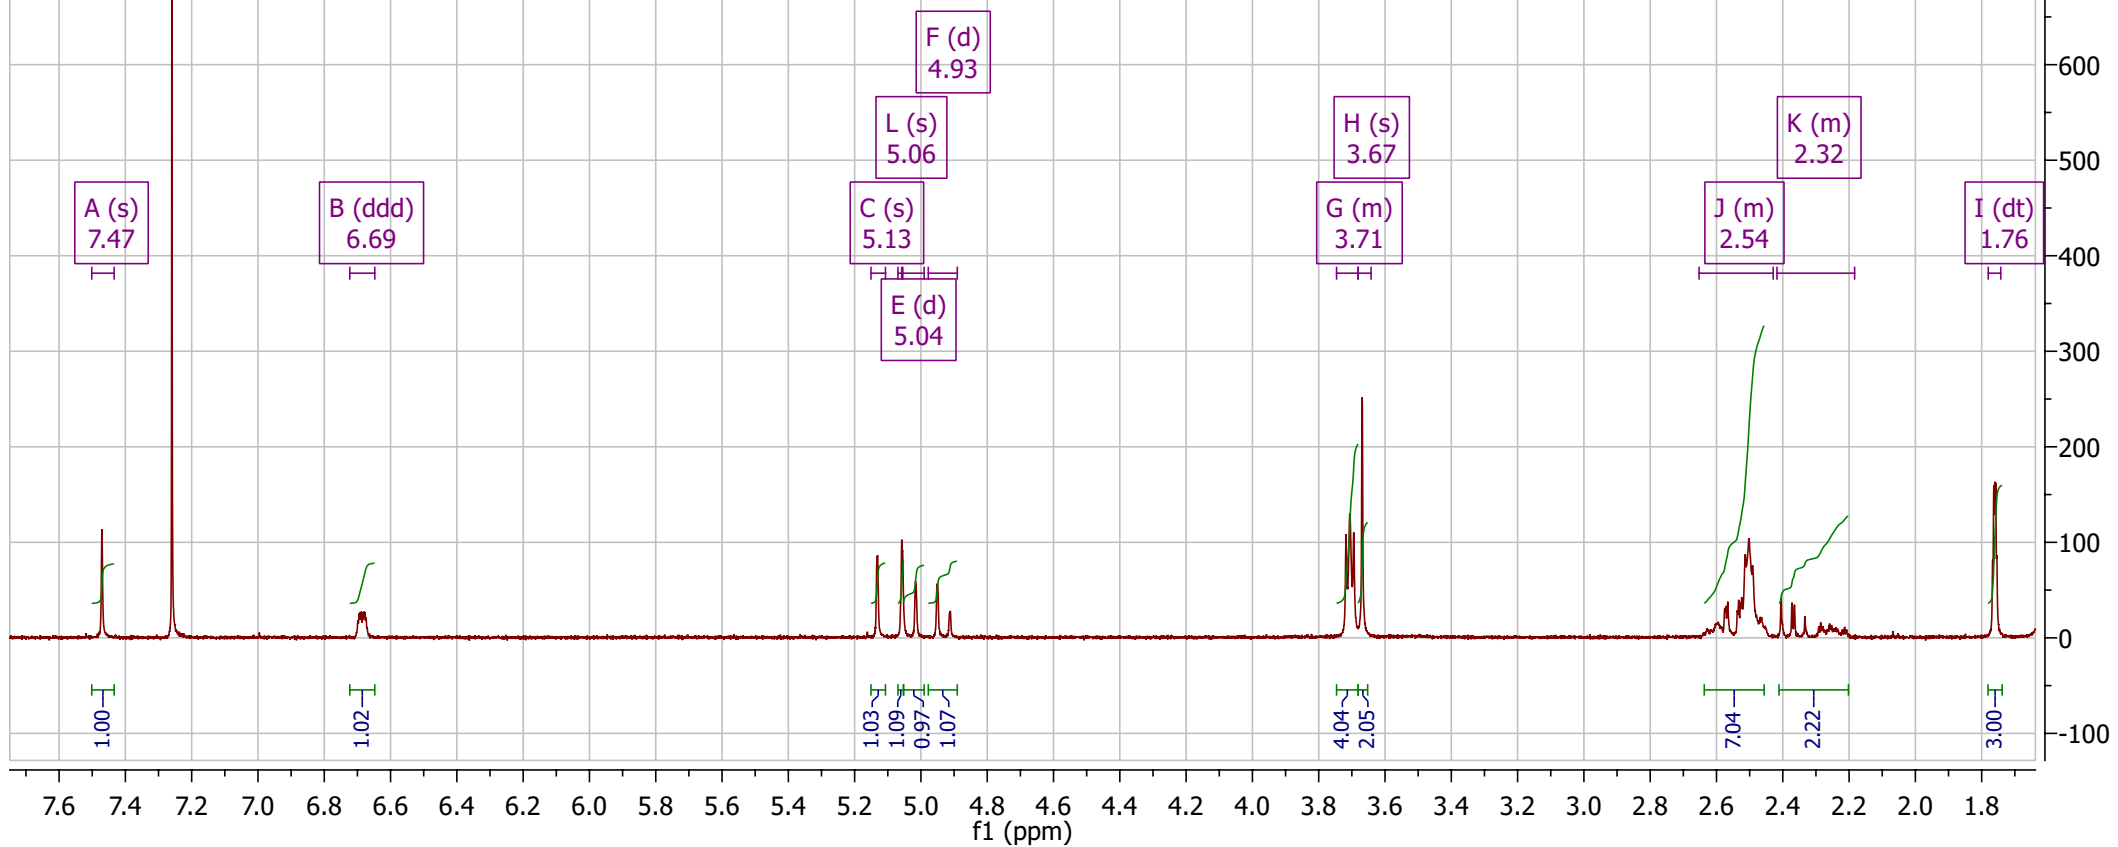

Molecular Formula: C<sub>17</sub>H<sub>24</sub>N<sub>4</sub>O<sub>2</sub>

<sup>13</sup>C NMR (101 MHz, CDCl<sub>3</sub>)

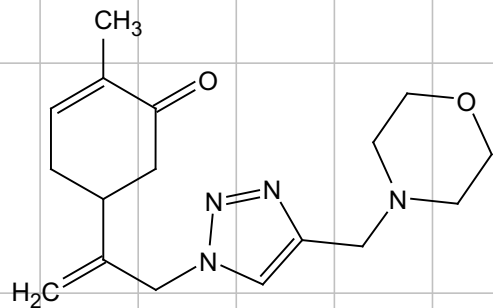

4a

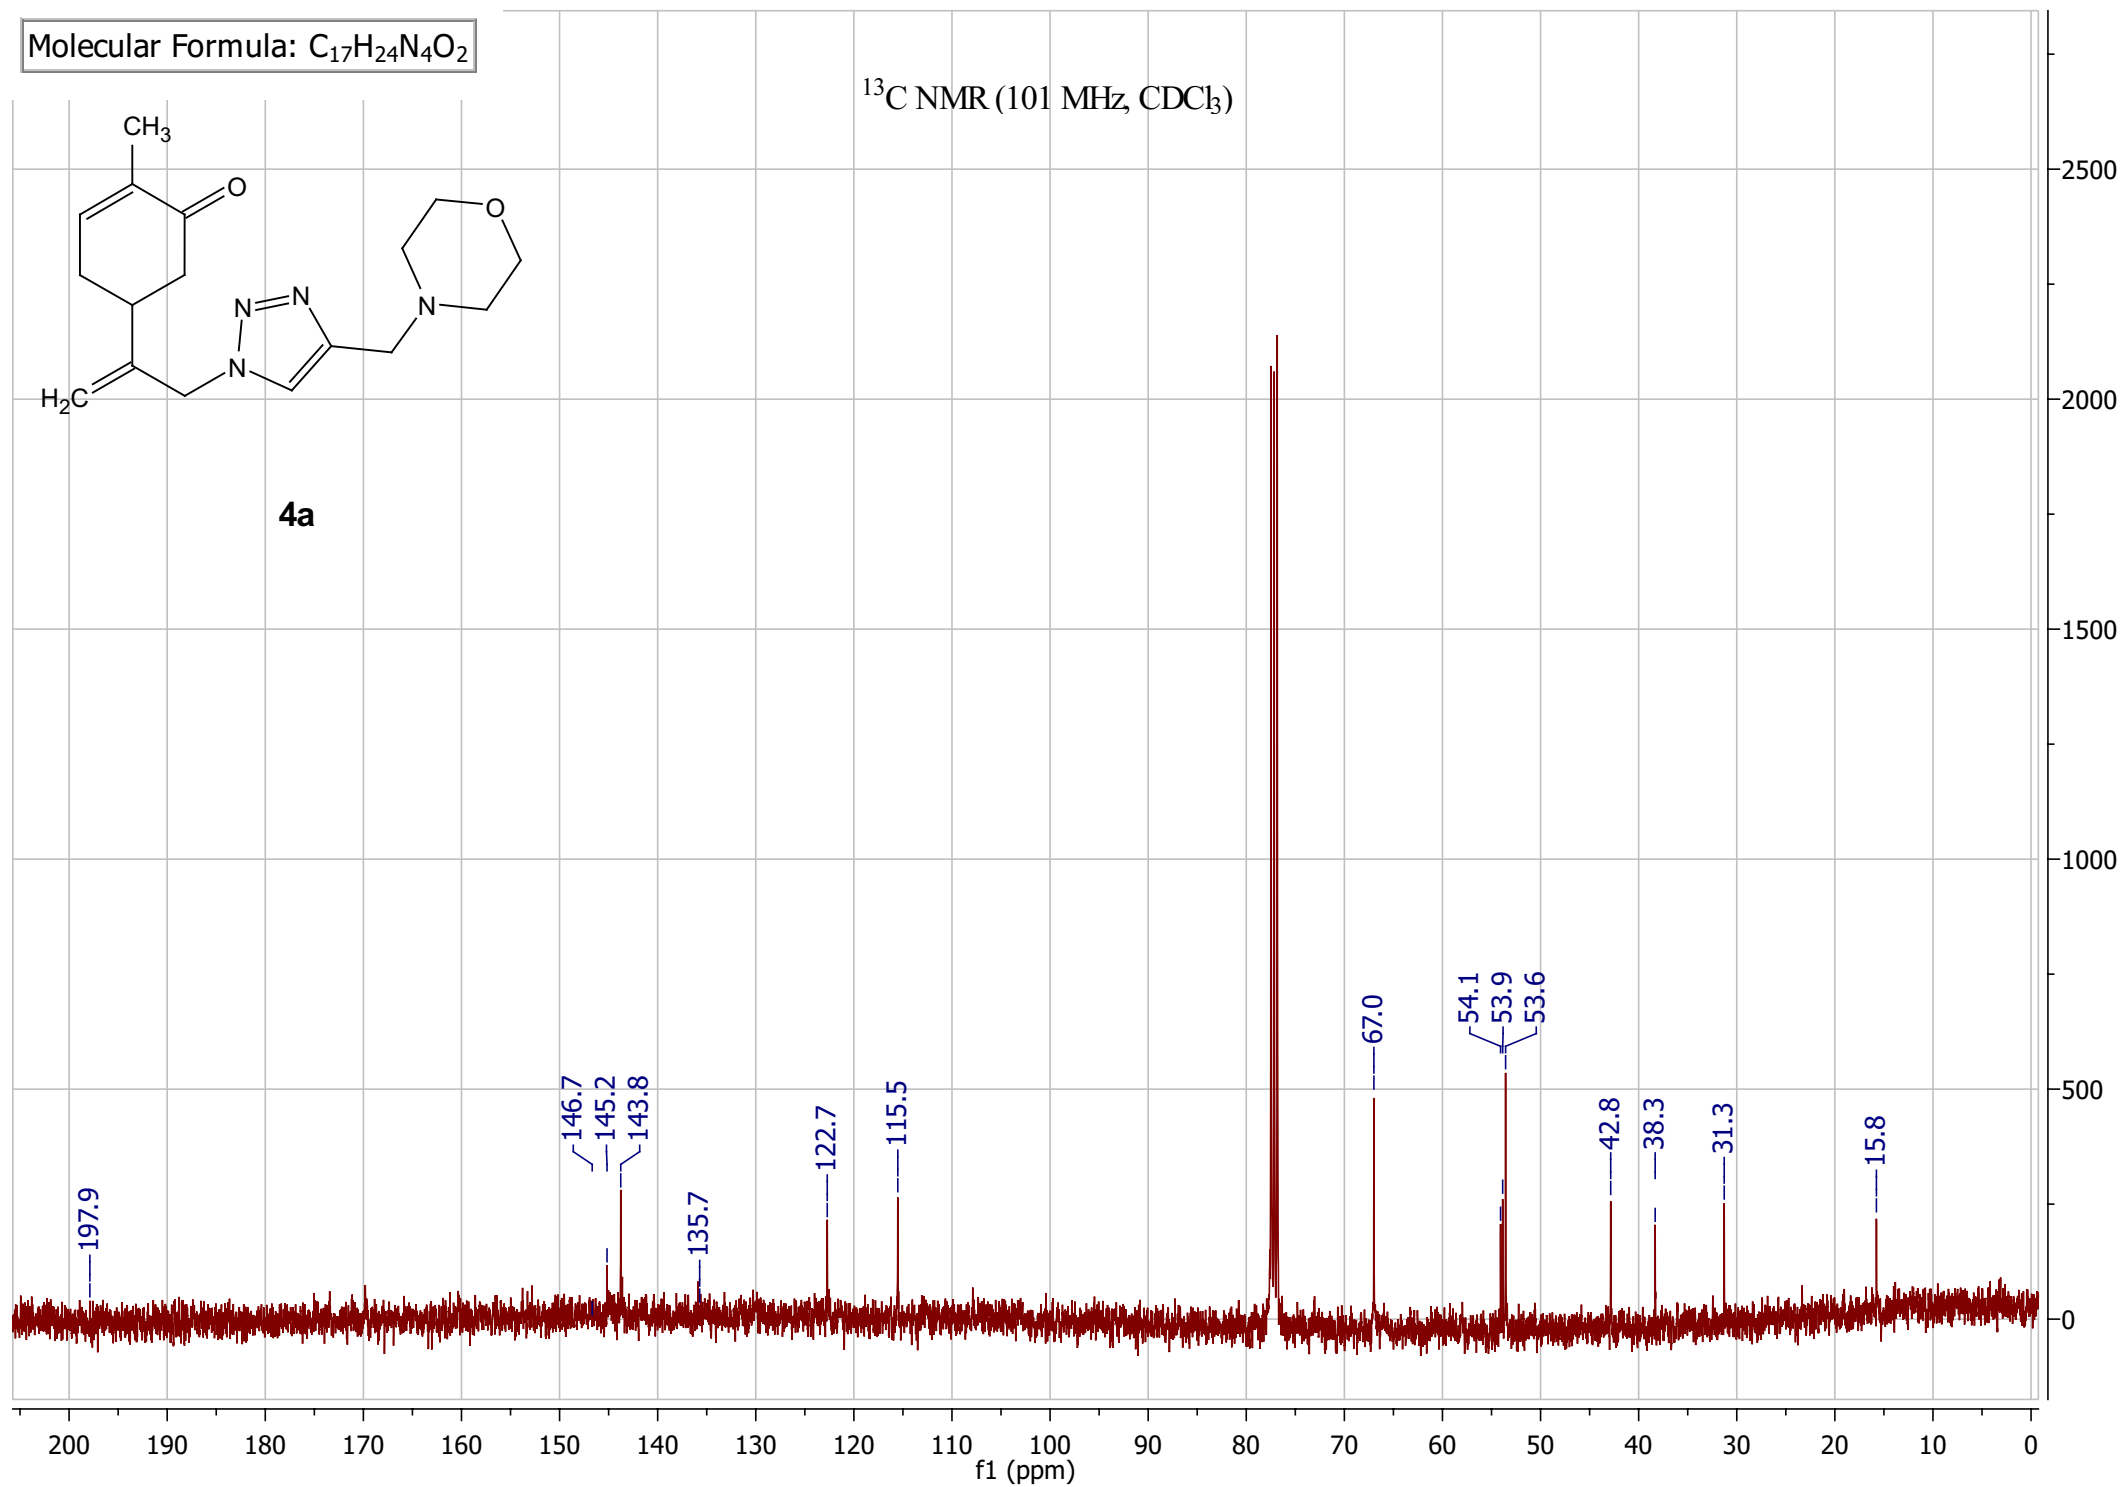

Molecular Formula: C<sub>18</sub>H<sub>27</sub>N<sub>5</sub>O

<sup>13</sup>C NMR (101 MHz, CDCl<sub>3</sub>)

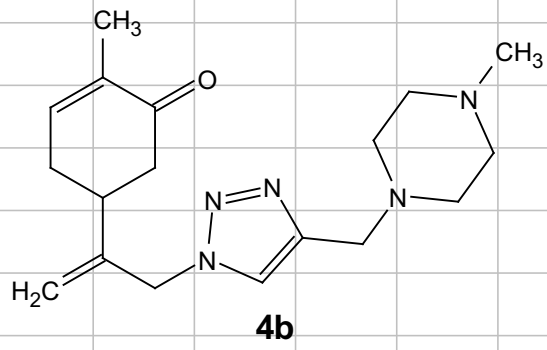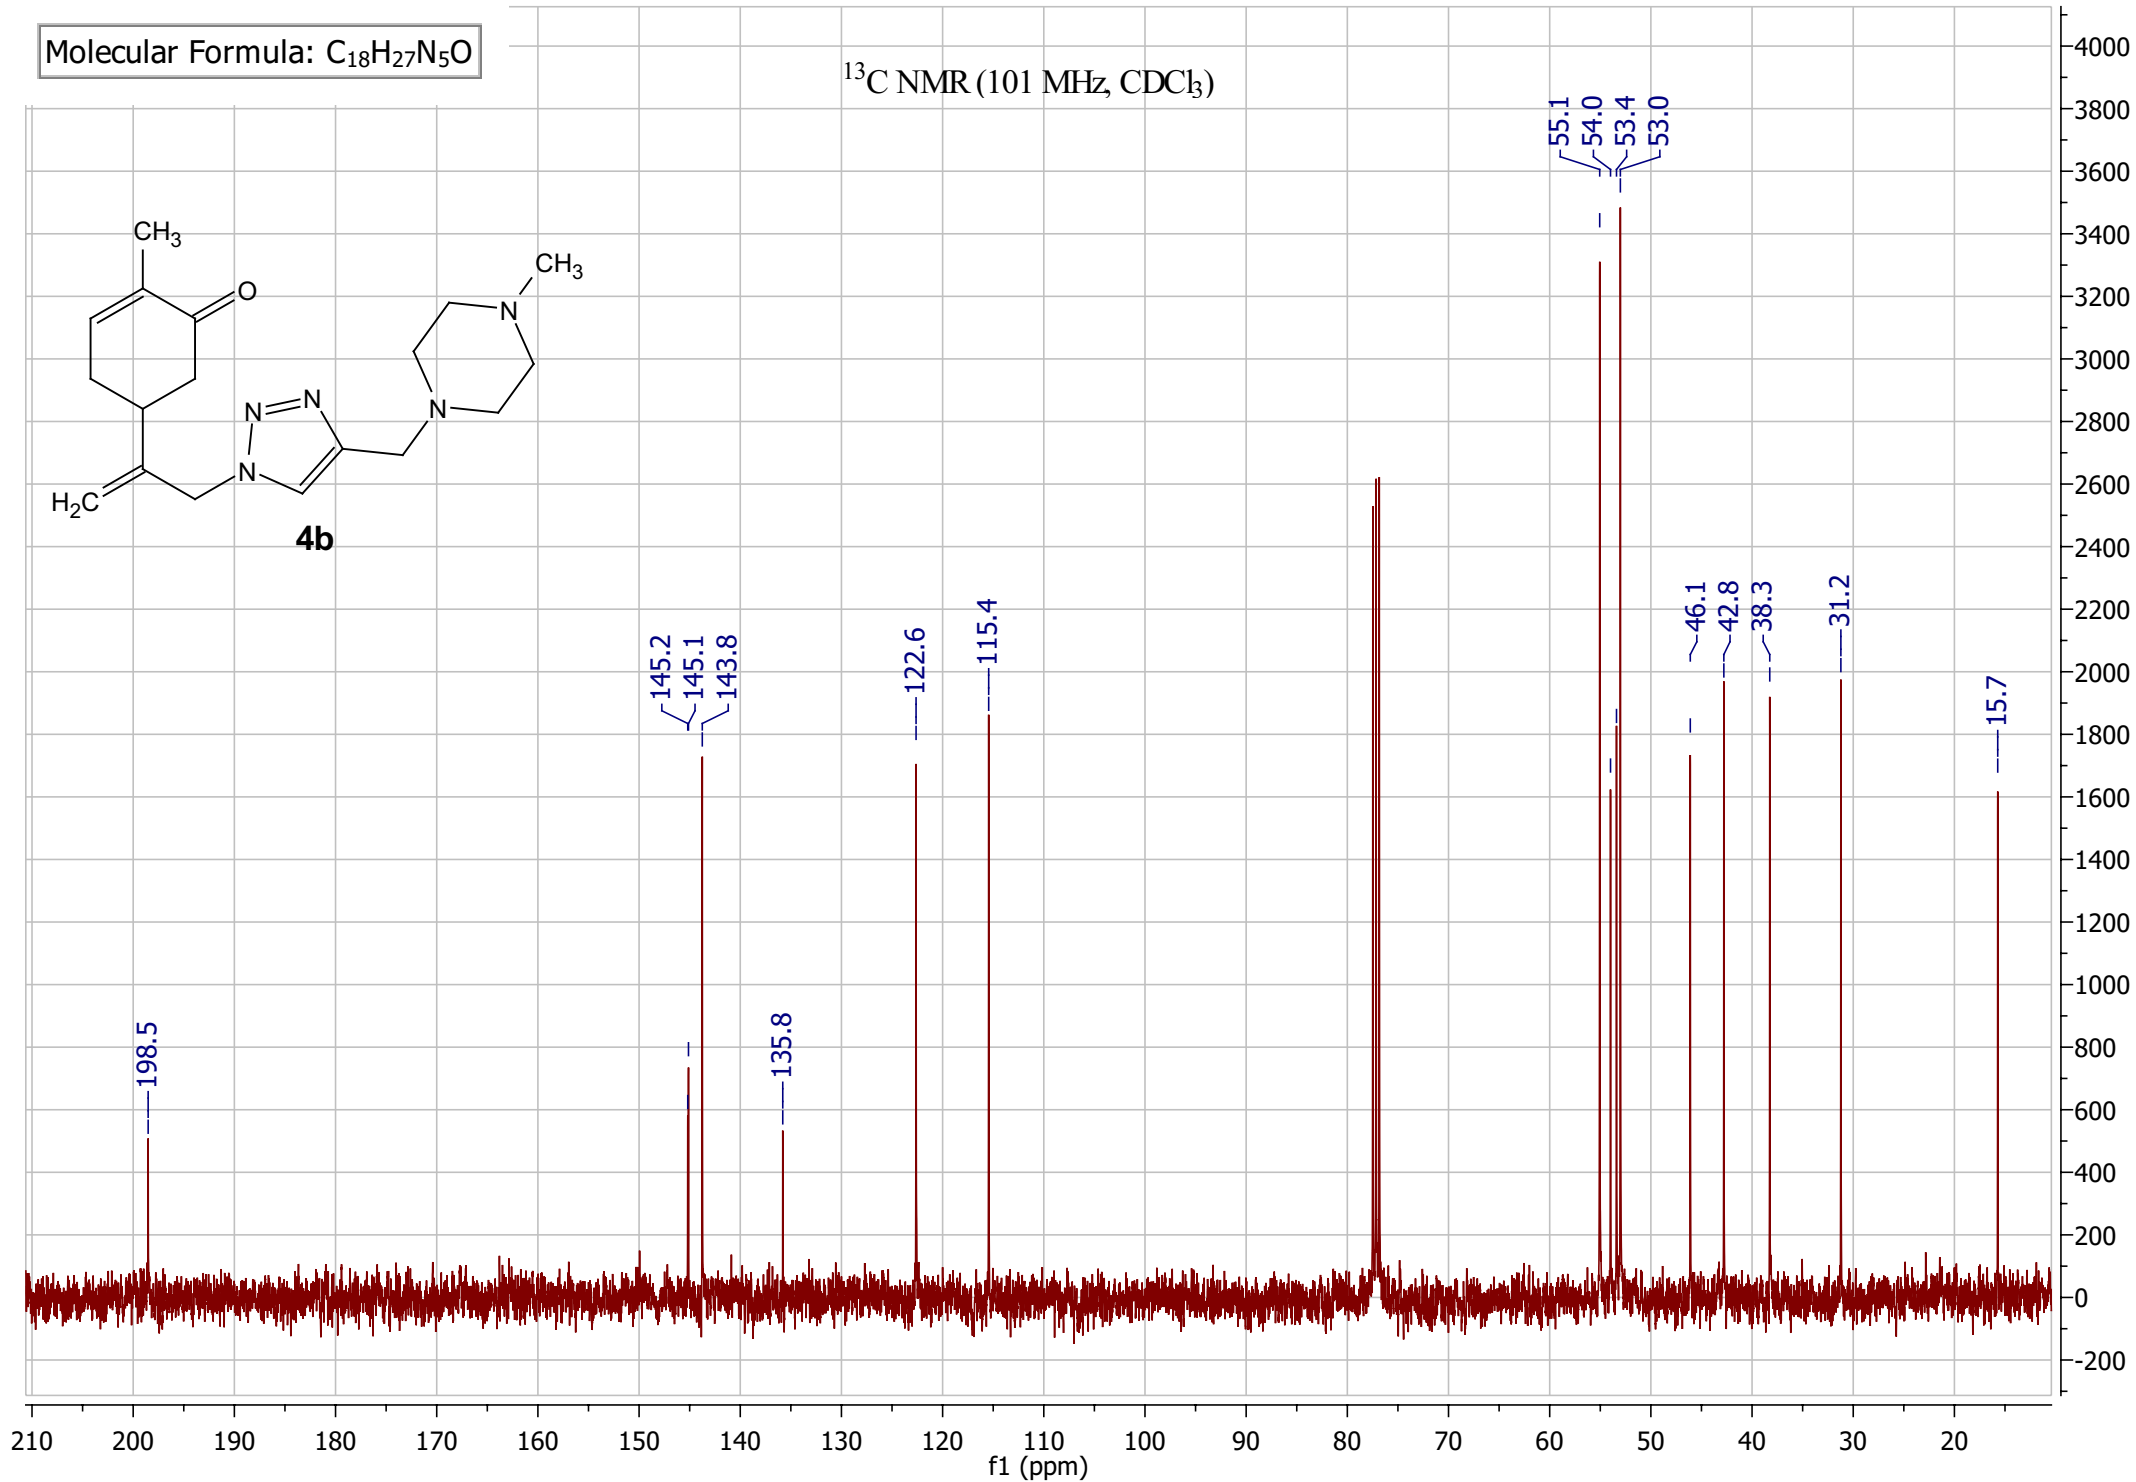

Molecular Formula: C<sub>18</sub>H<sub>27</sub>N<sub>5</sub>O

<sup>1</sup>H NMR (400 MHz, CDCl<sub>3</sub>)

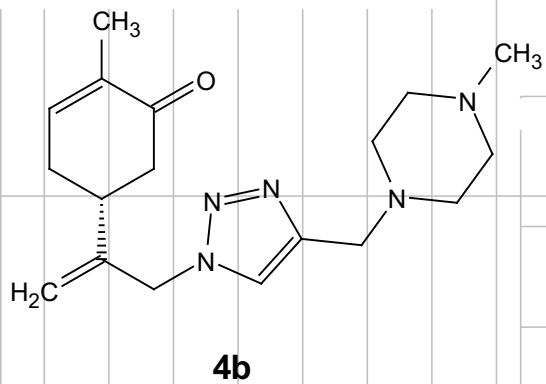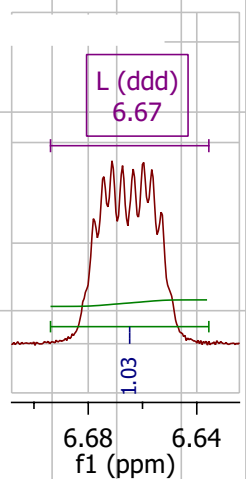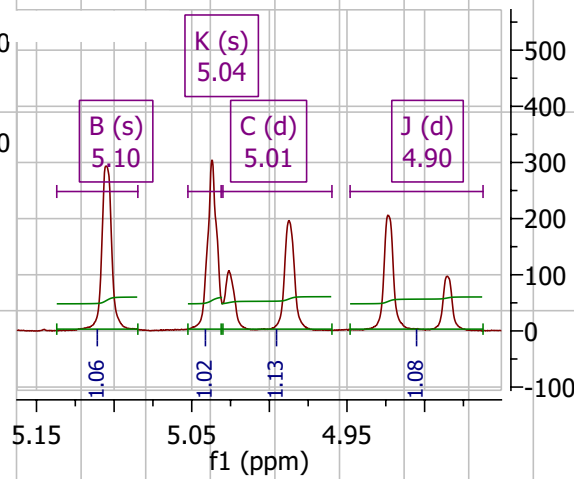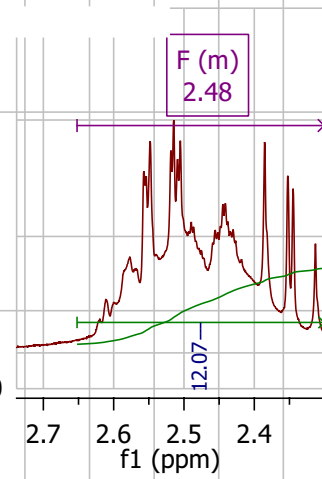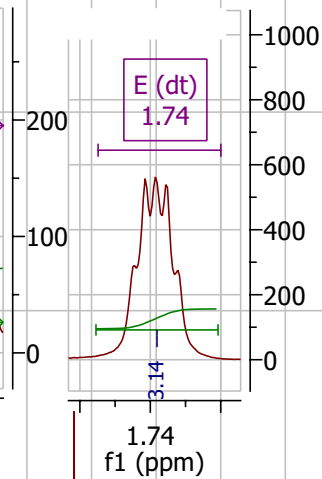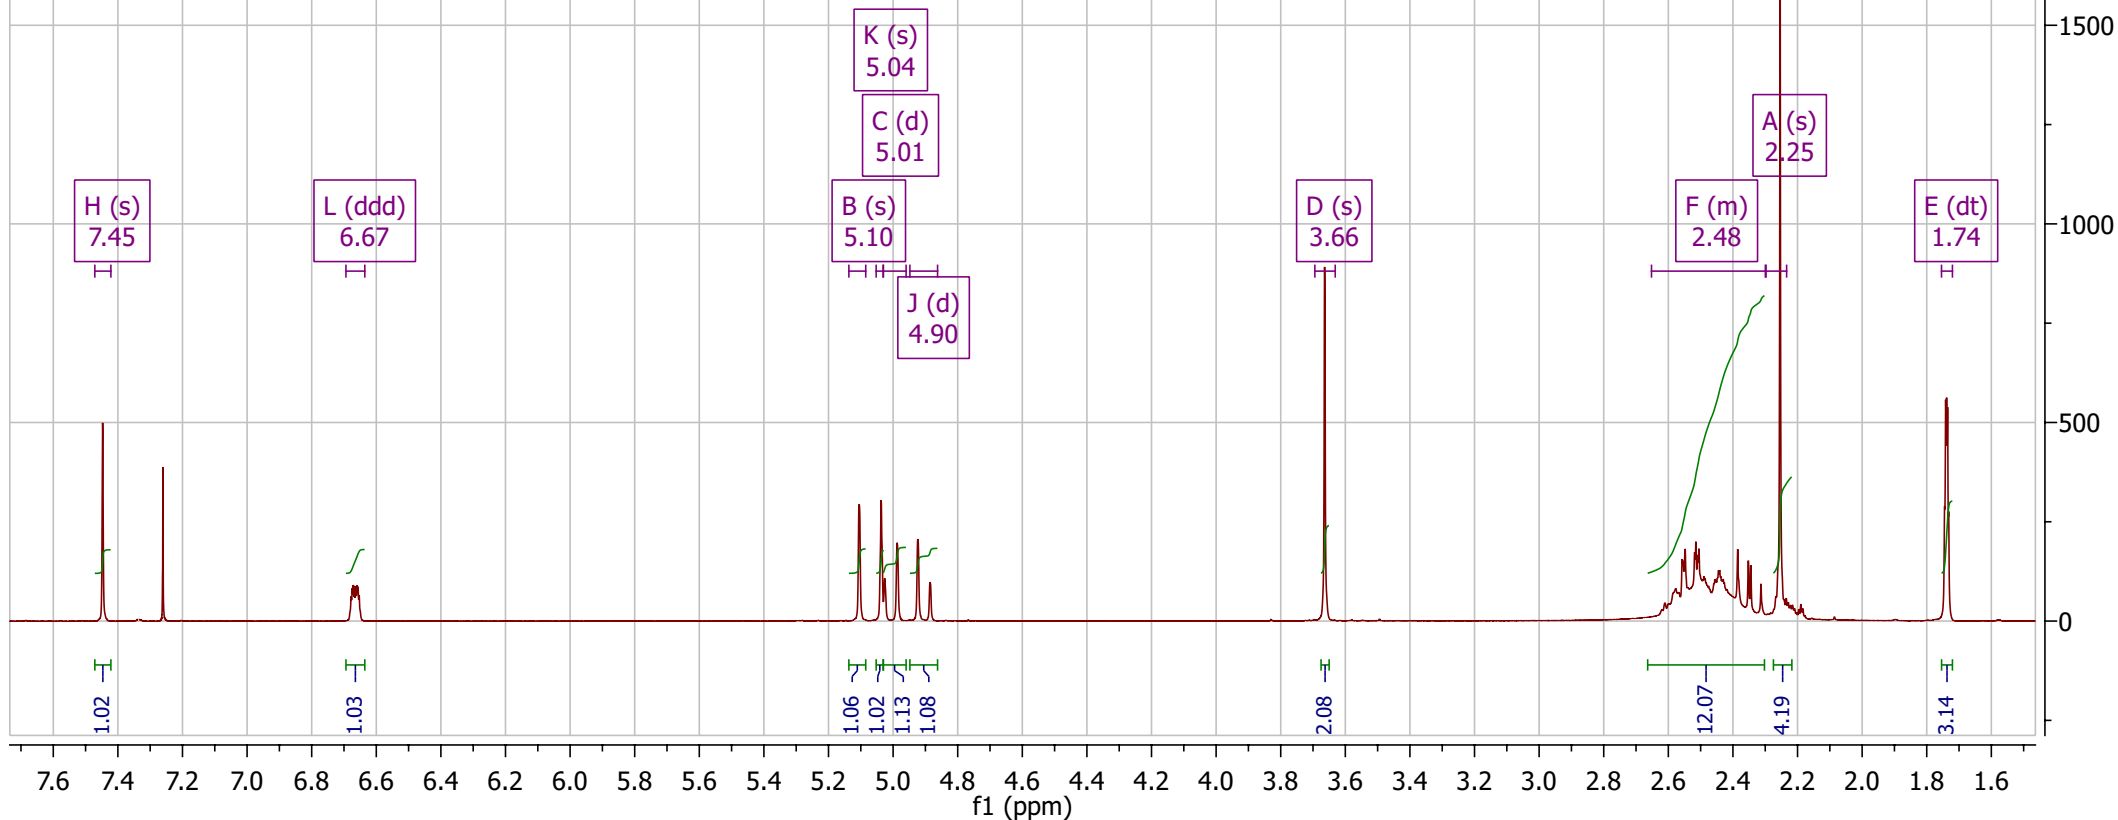

Molecular Formula: C<sub>17</sub>H<sub>24</sub>N<sub>4</sub>O

<sup>13</sup>C NMR (101 MHz, DMSO)

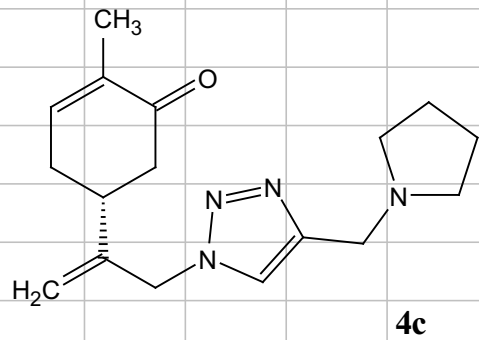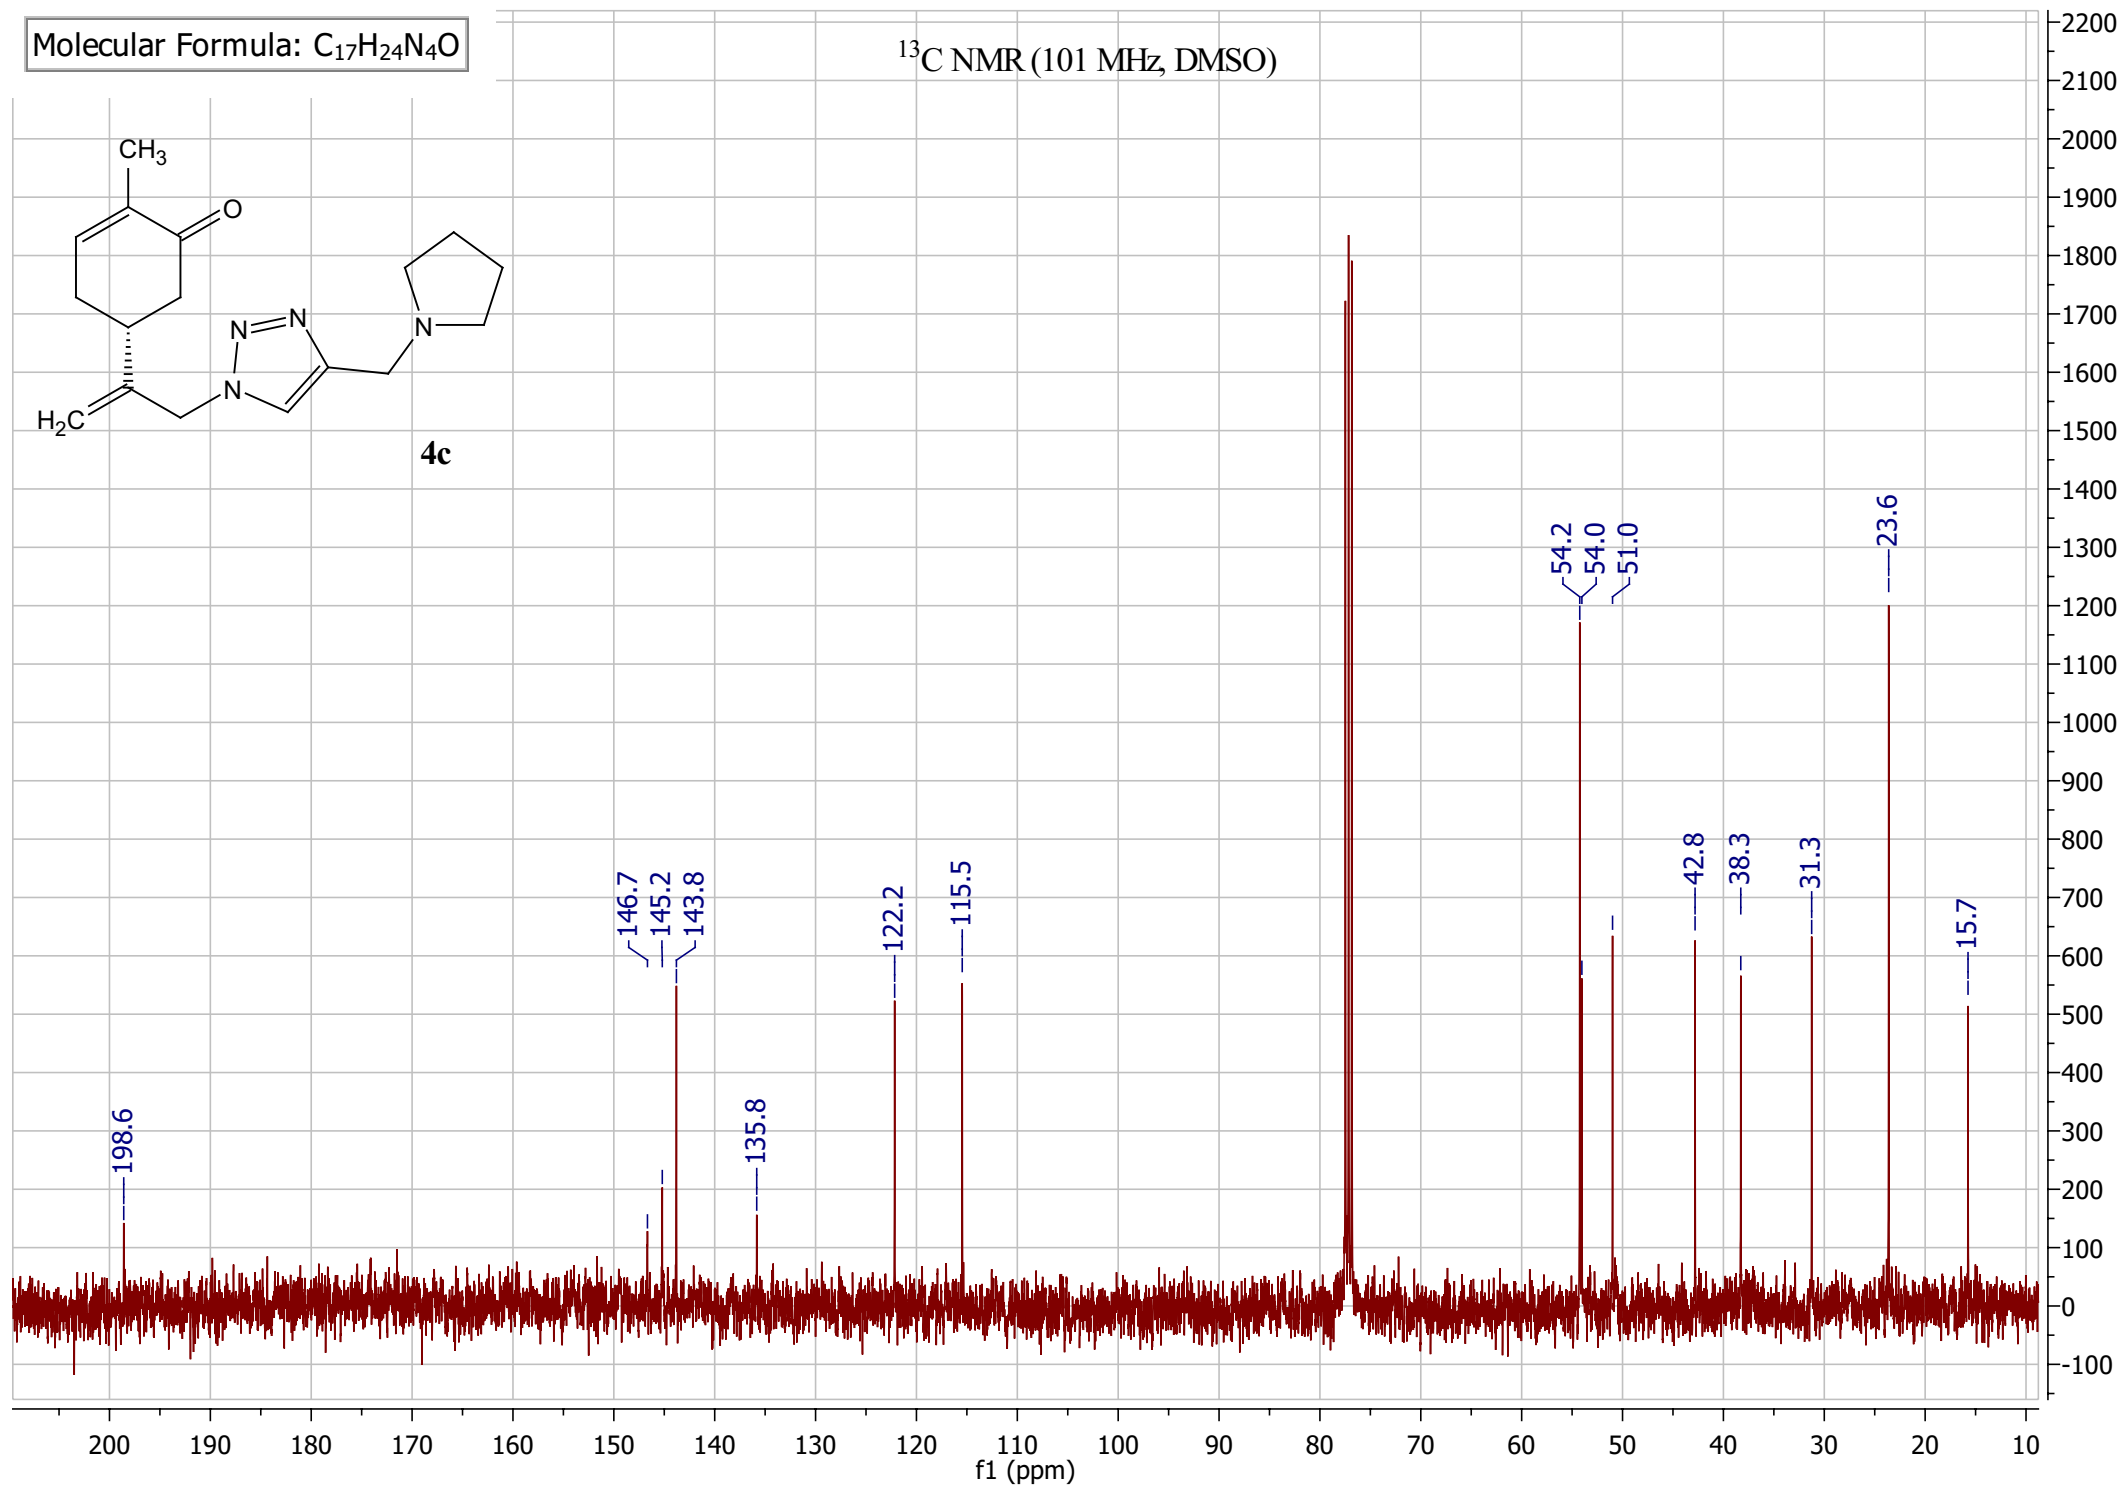

Molecular Formula: C<sub>17</sub>H<sub>24</sub>N<sub>4</sub>O

<sup>1</sup>H NMR (400 MHz, CDCl<sub>3</sub>)

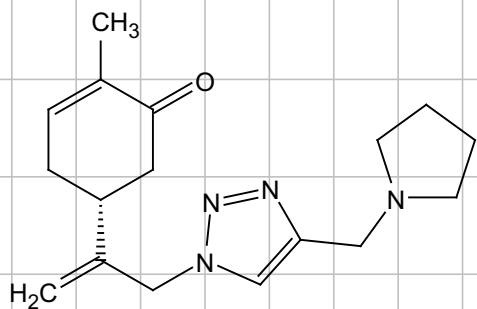

4c

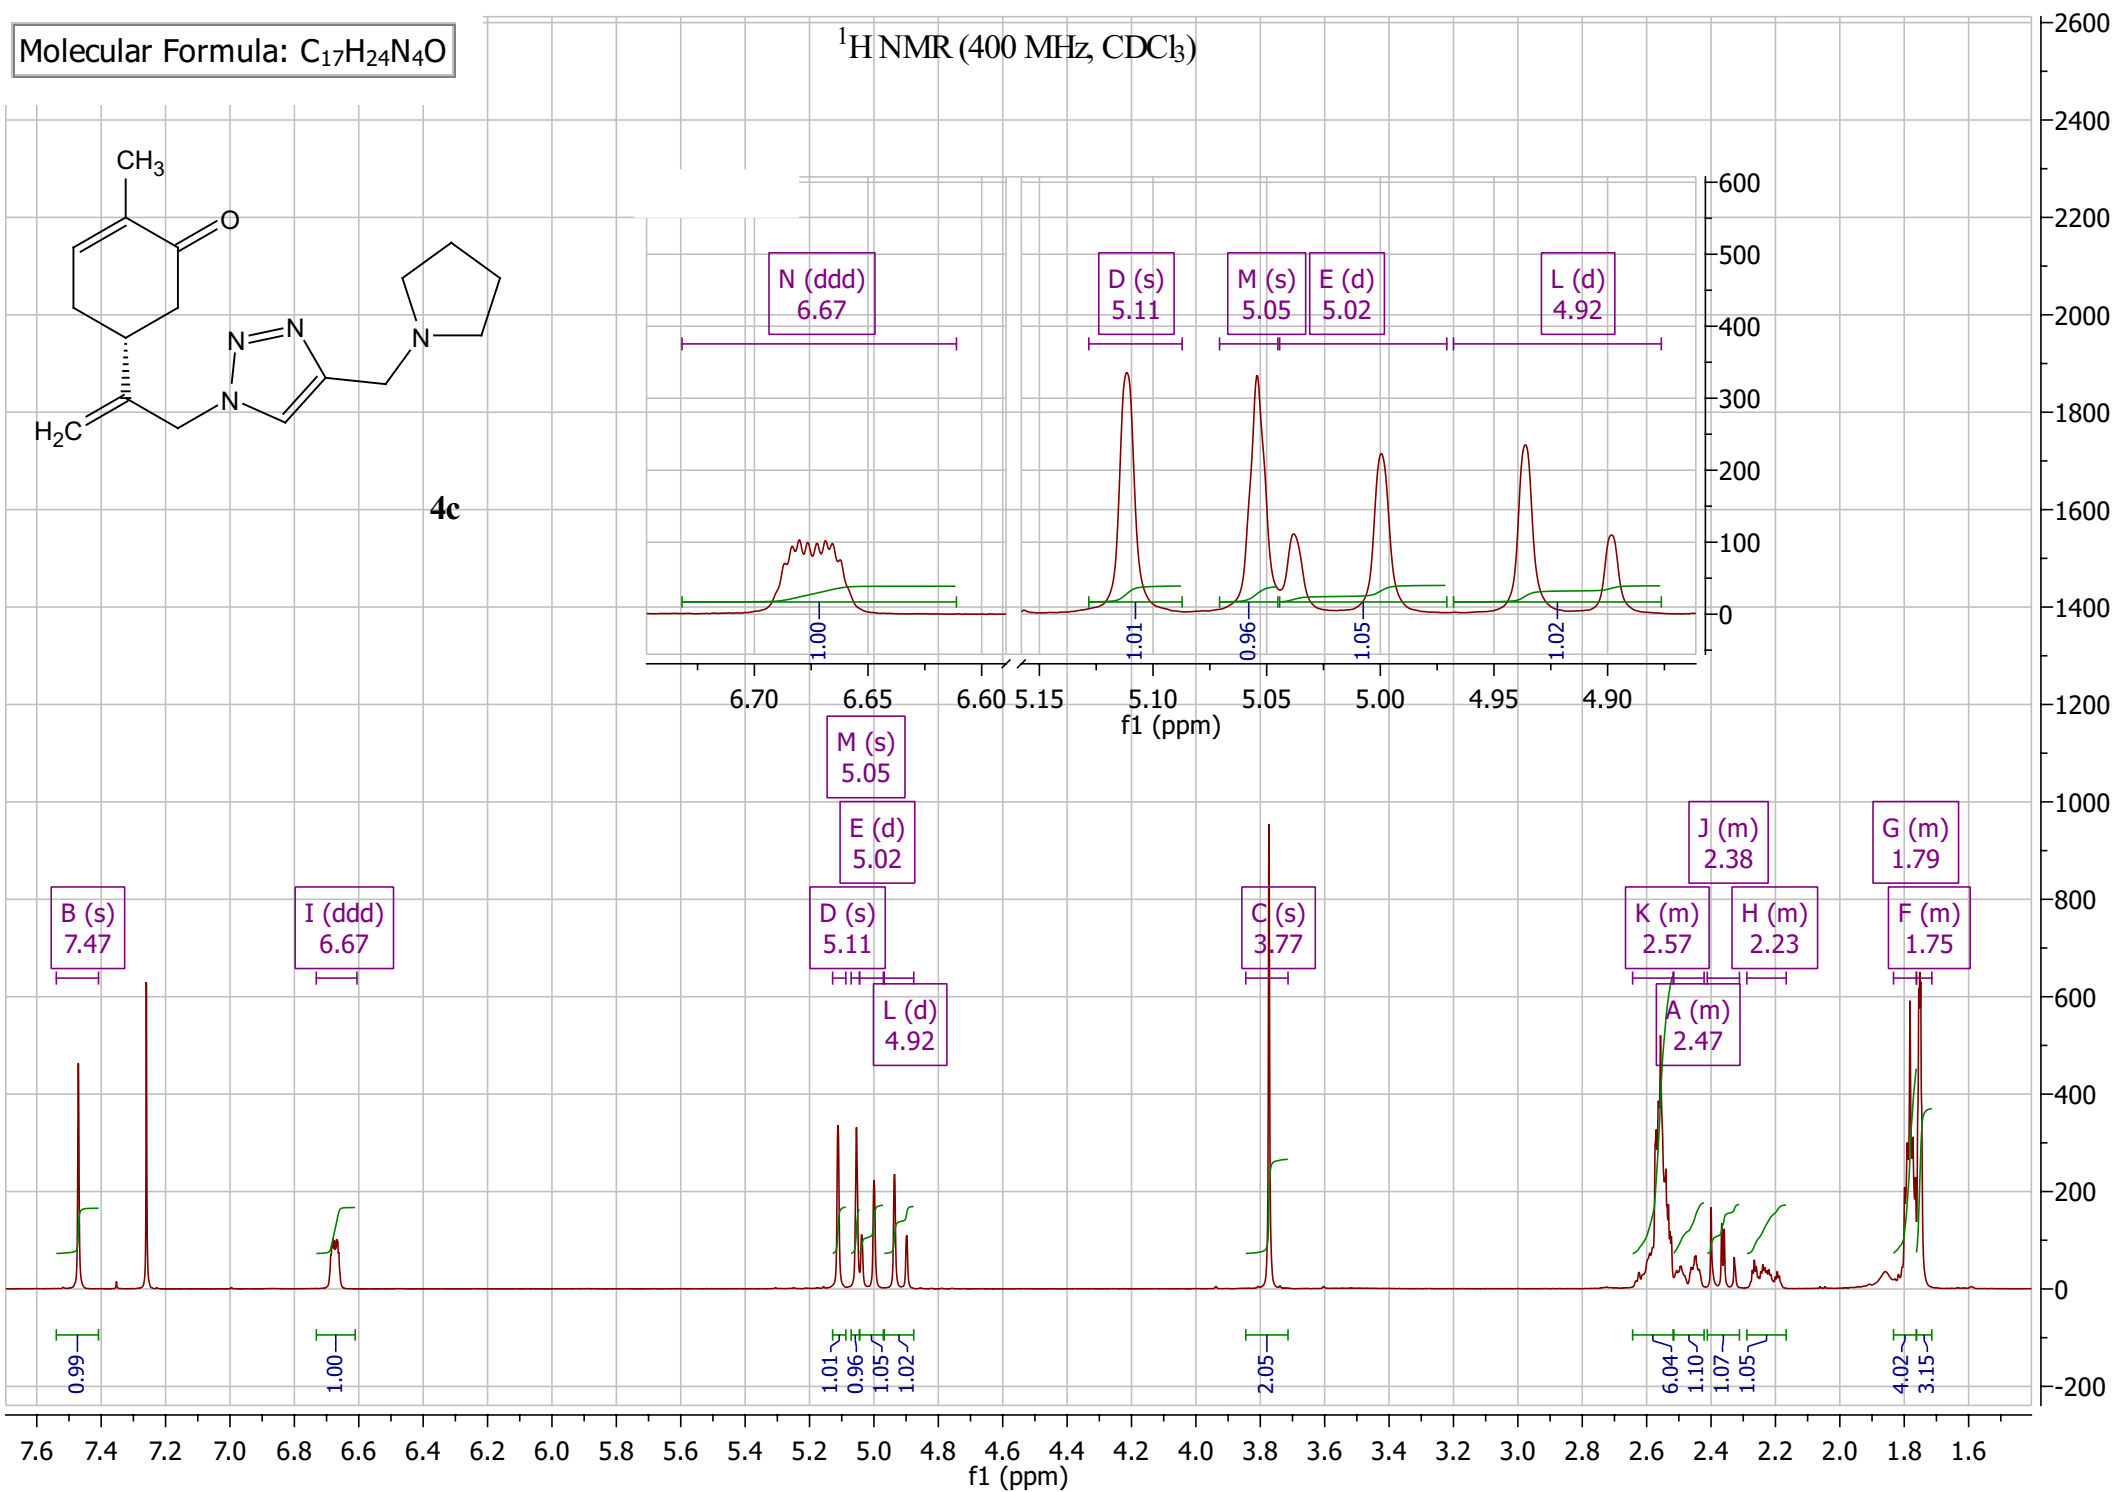

Molecular Formula: C<sub>18</sub>H<sub>26</sub>N<sub>4</sub>O

<sup>13</sup>C NMR (75 MHz, DMSO/CCl<sub>4</sub> - 1/3)

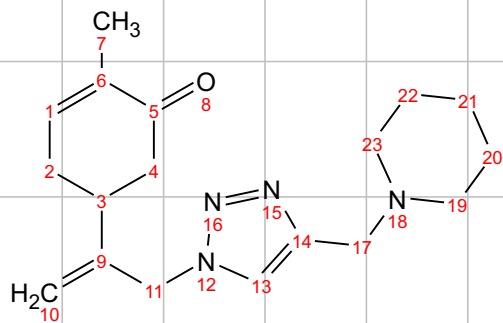

**4d**

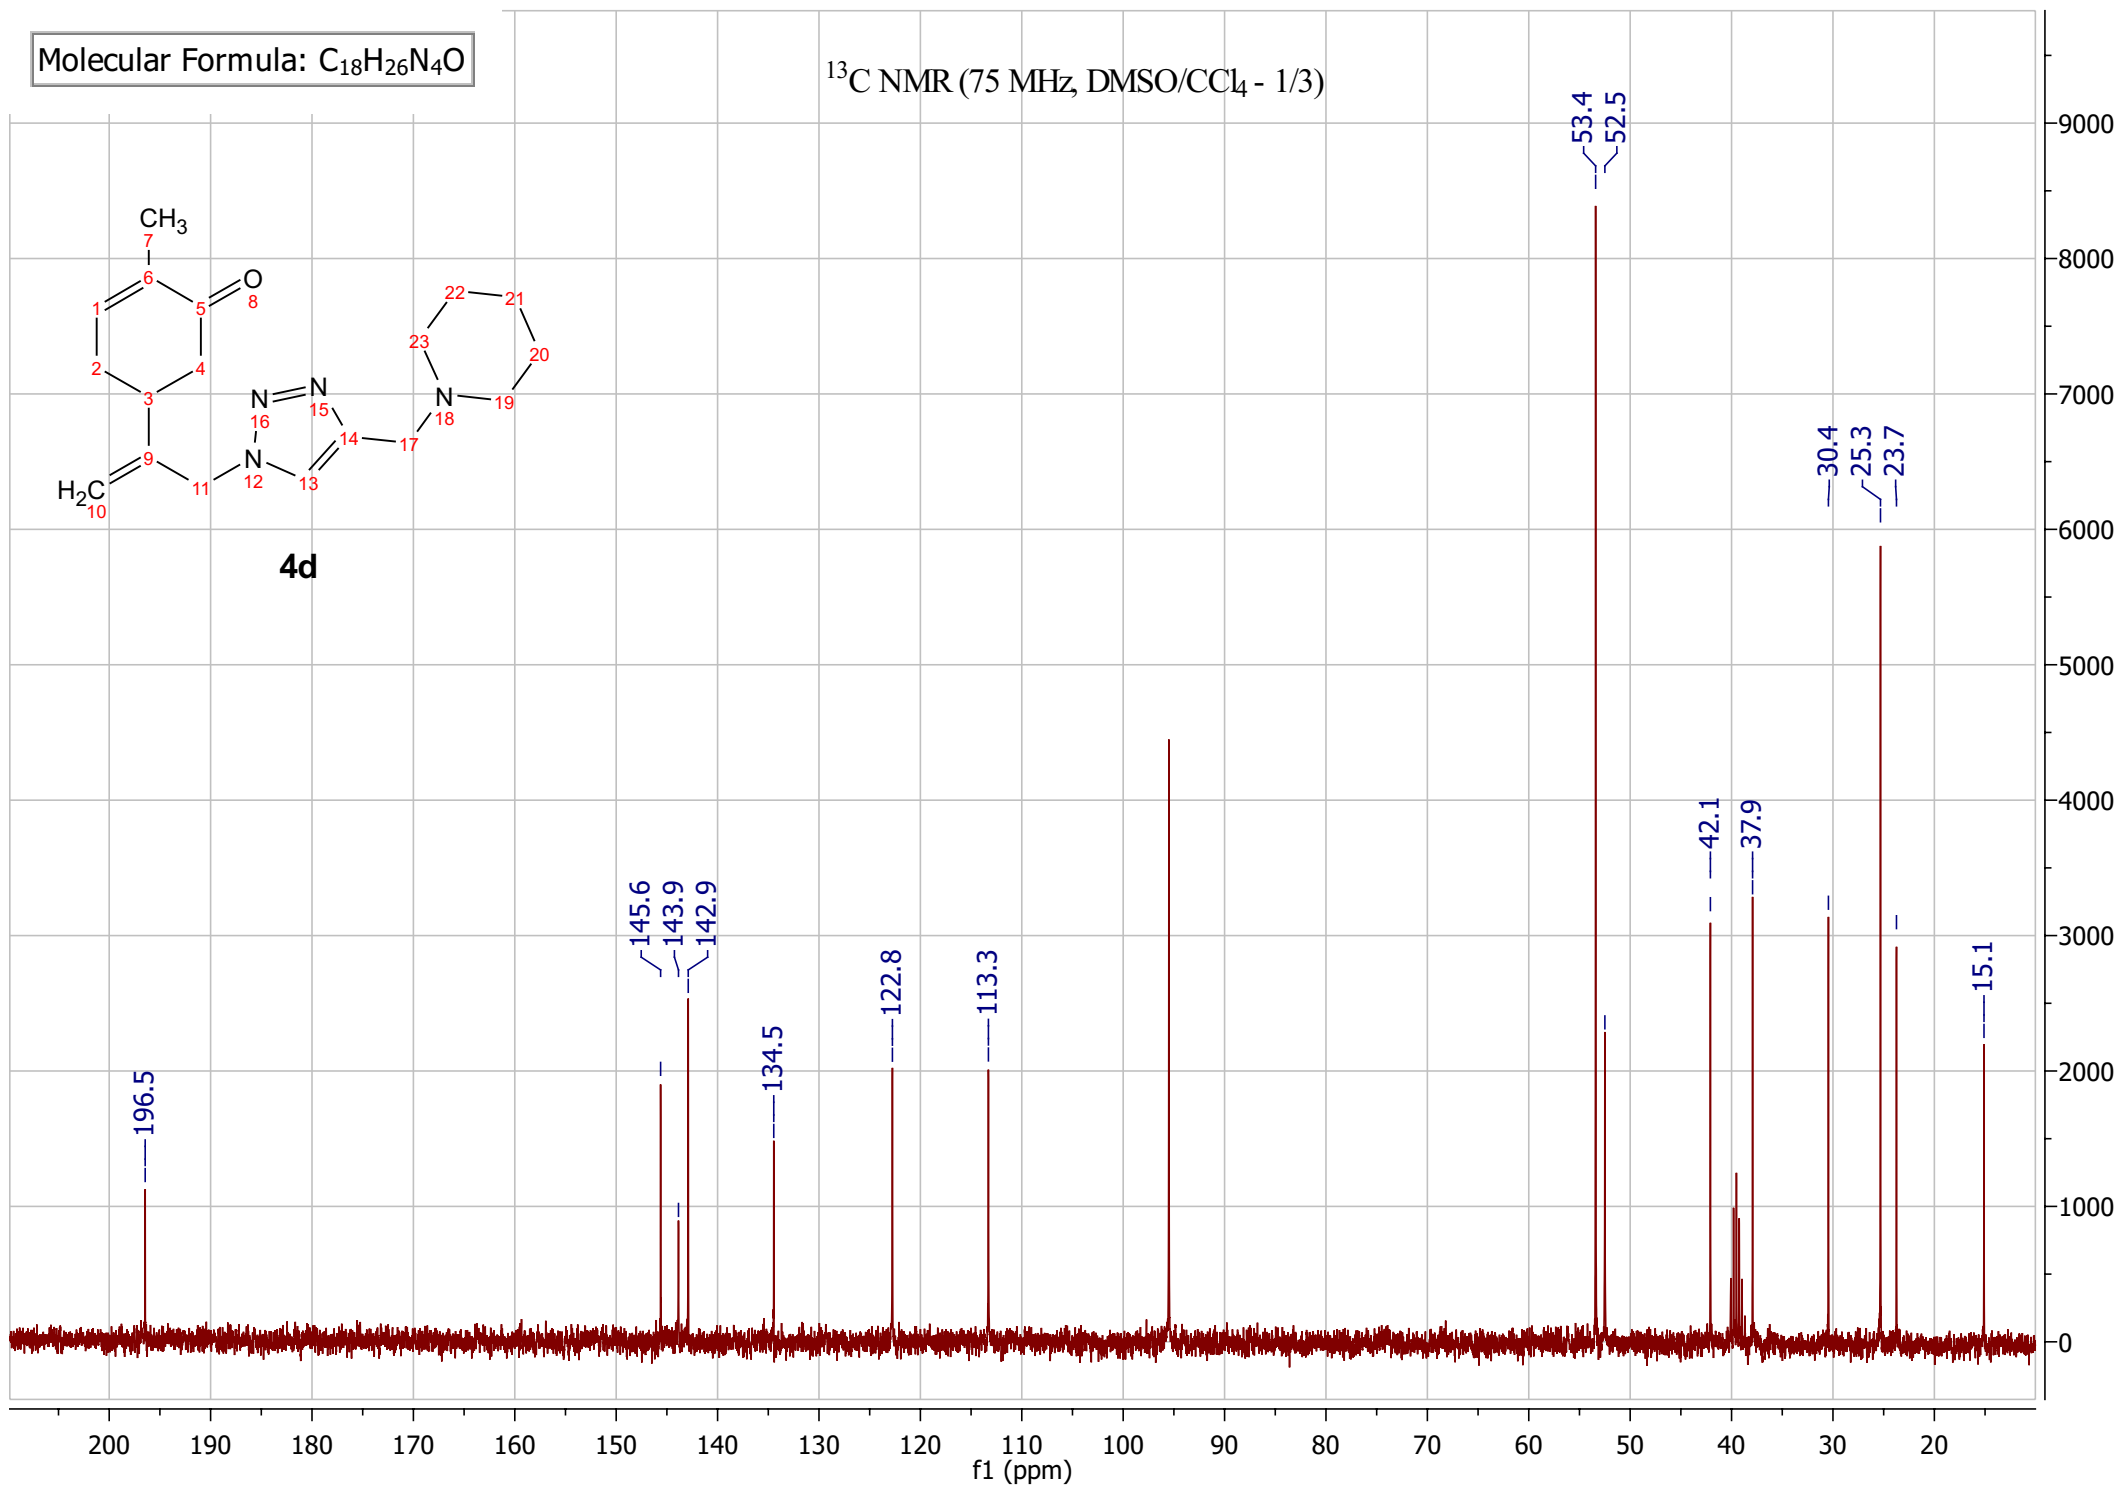

Molecular Formula: C<sub>18</sub>H<sub>26</sub>N<sub>4</sub>O

<sup>1</sup>H NMR (400 MHz, CDCl<sub>3</sub>)

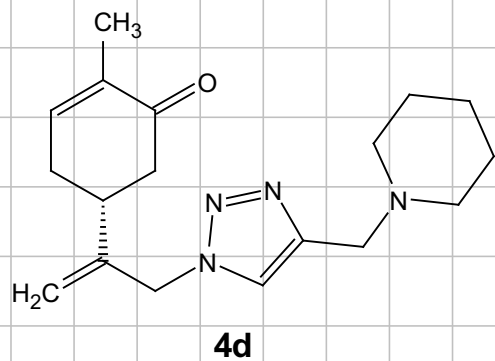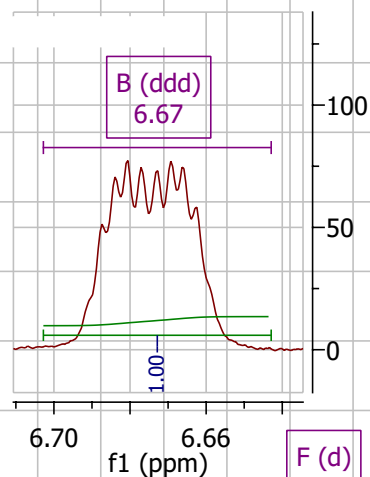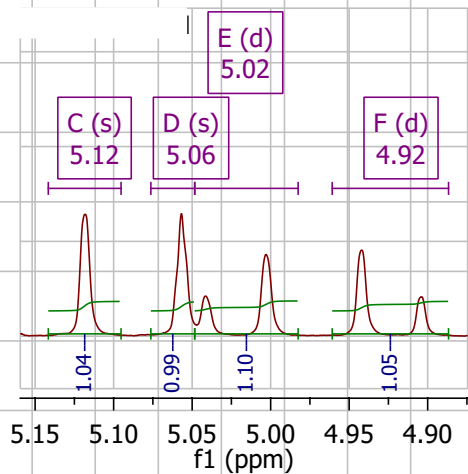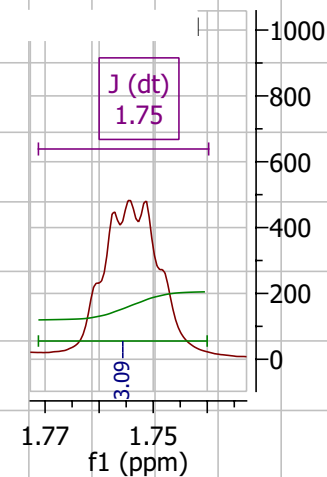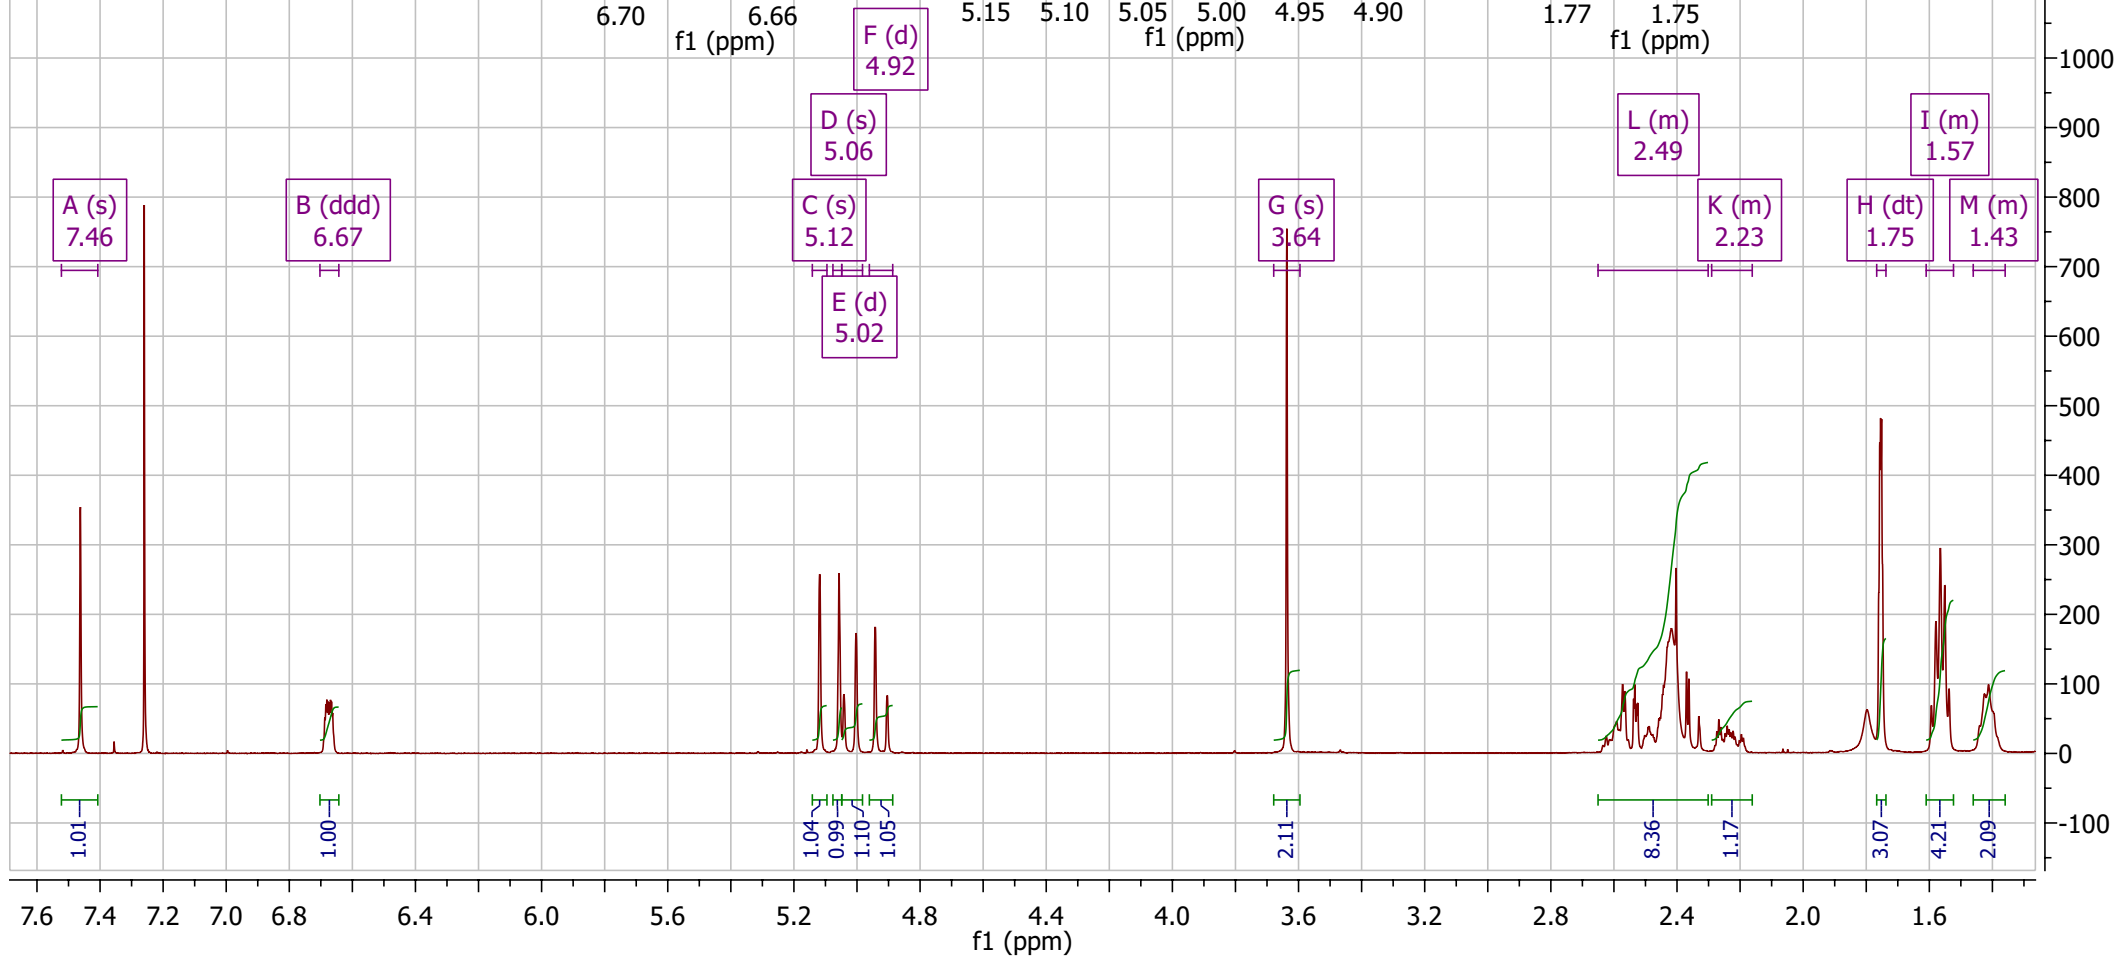



Molecular Formula: C<sub>19</sub>H<sub>28</sub>N<sub>4</sub>O

<sup>13</sup>C NMR (101 MHz, CDCl<sub>3</sub>)

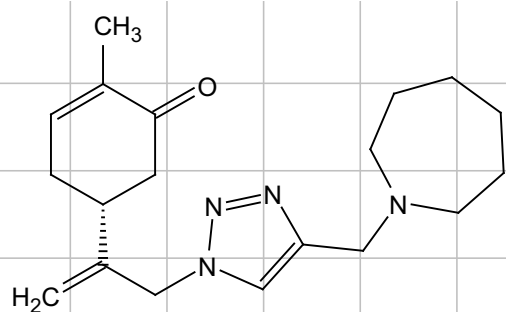

**4e**

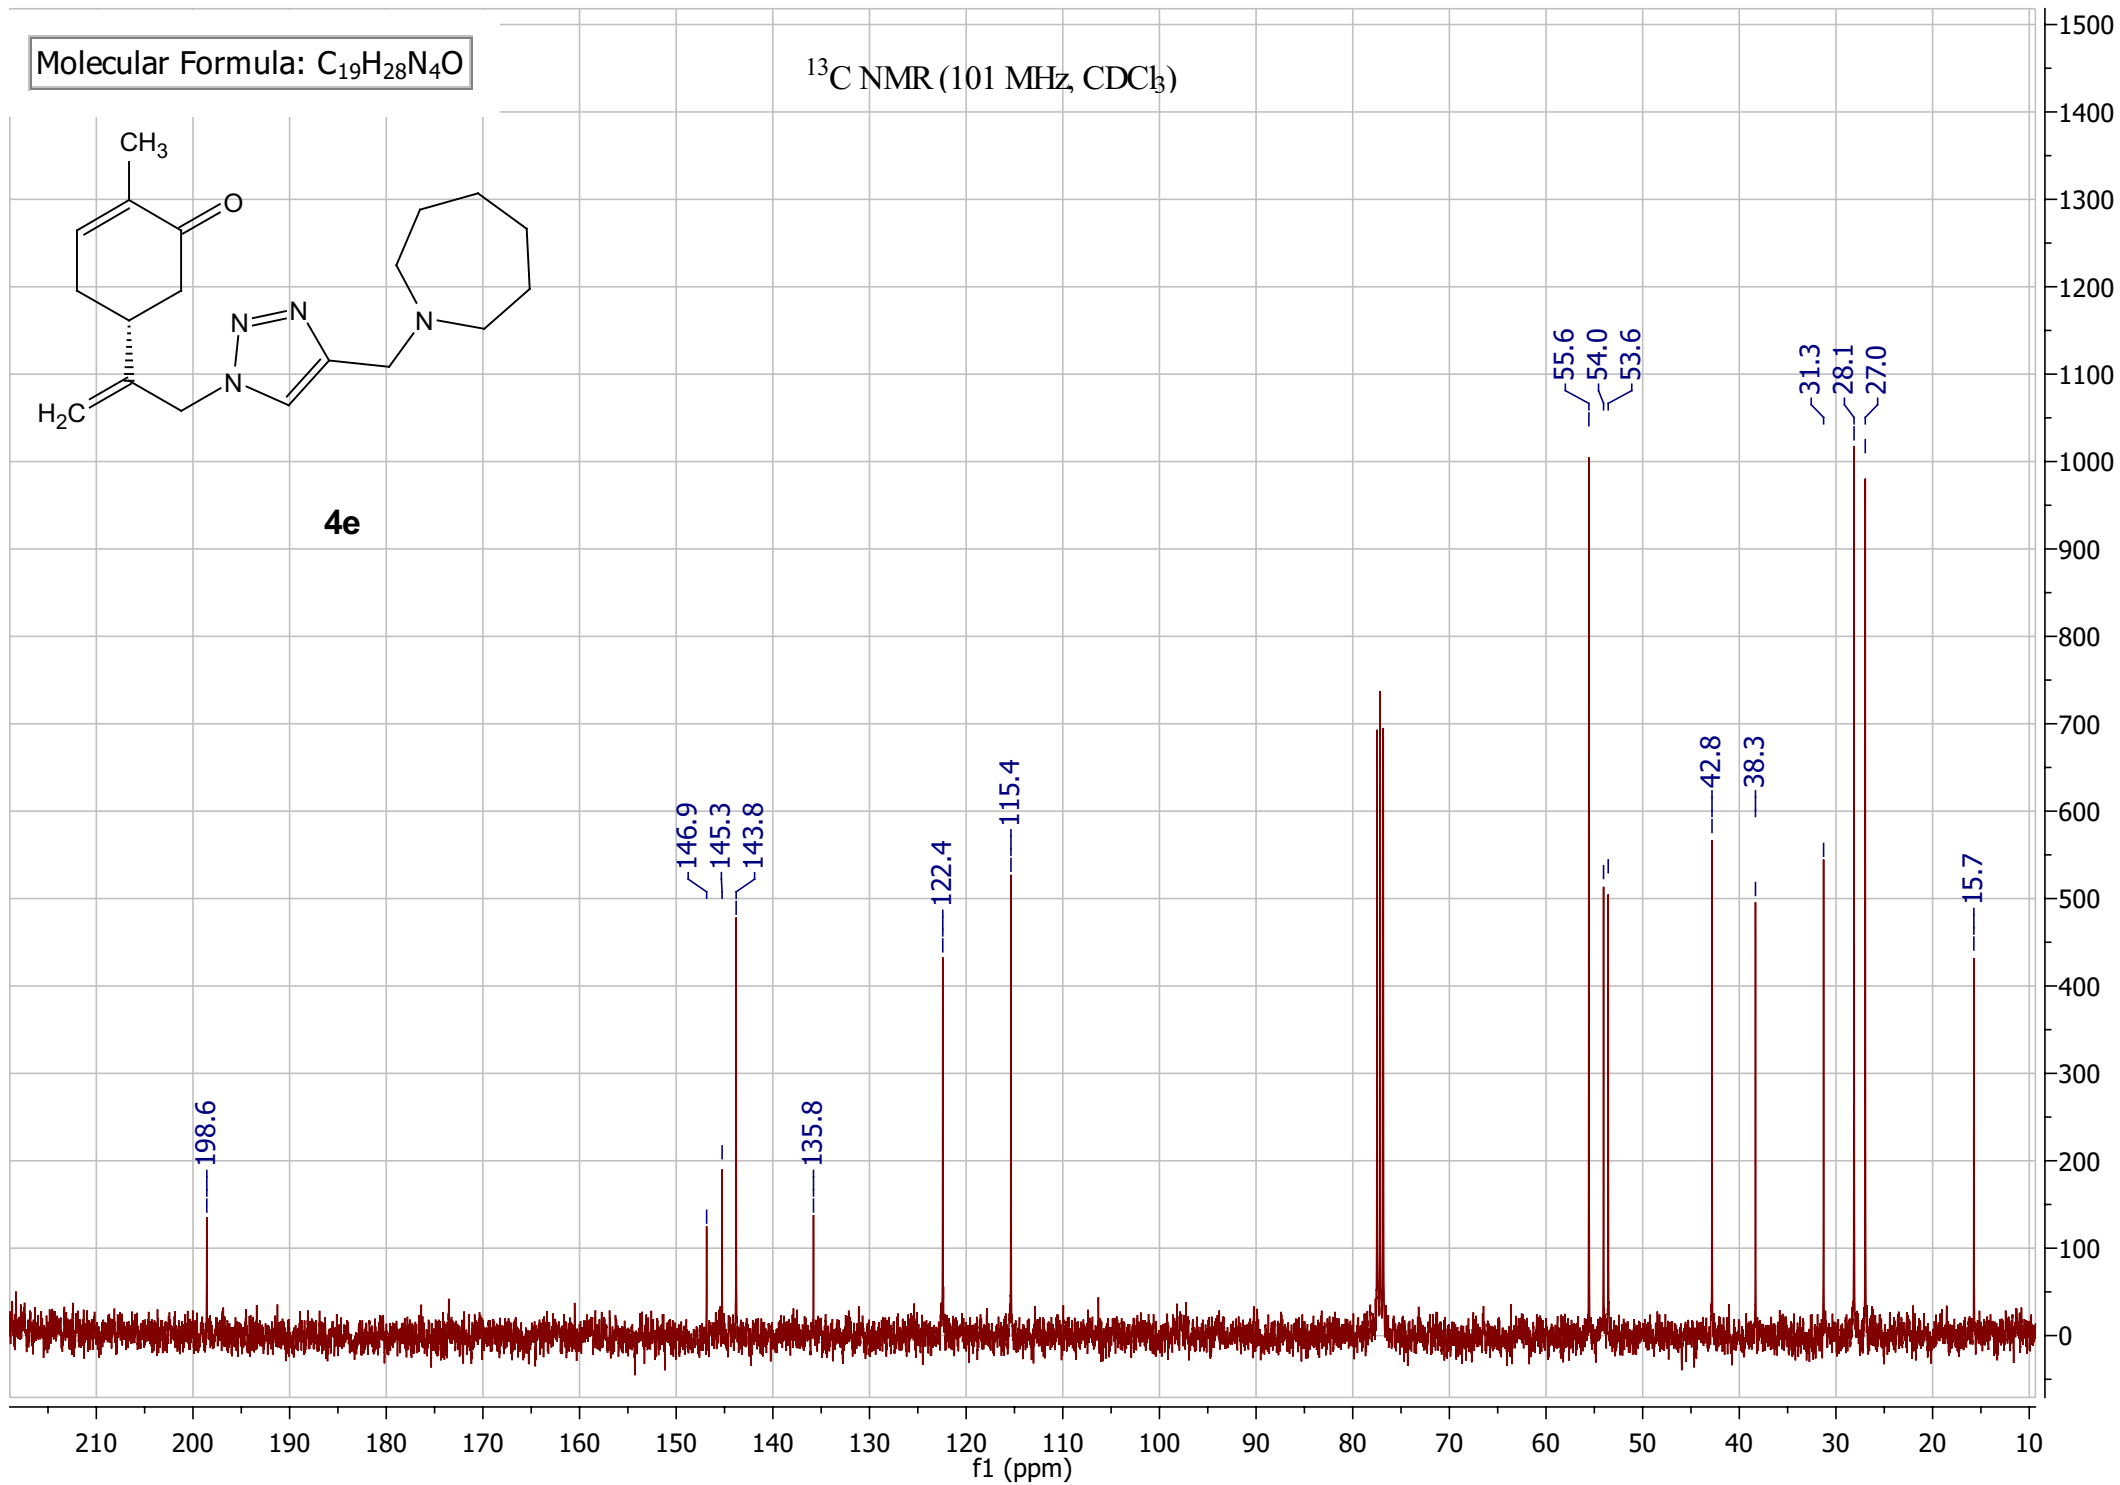

Molecular Formula: C<sub>19</sub>H<sub>28</sub>N<sub>4</sub>O

<sup>1</sup>H NMR (400 MHz, CDCl<sub>3</sub>)

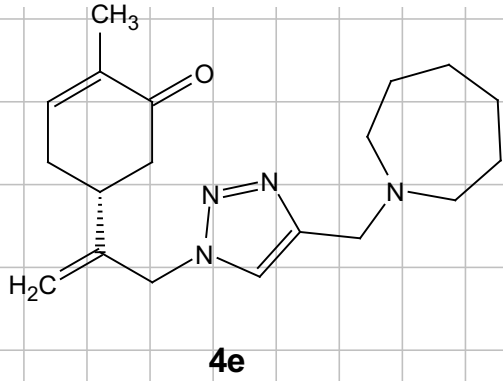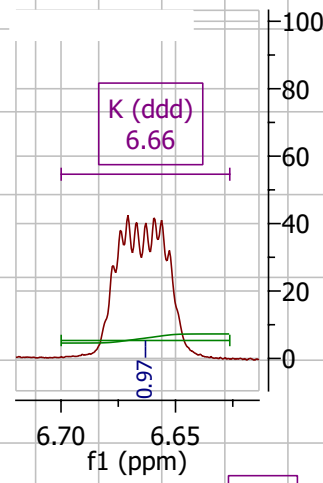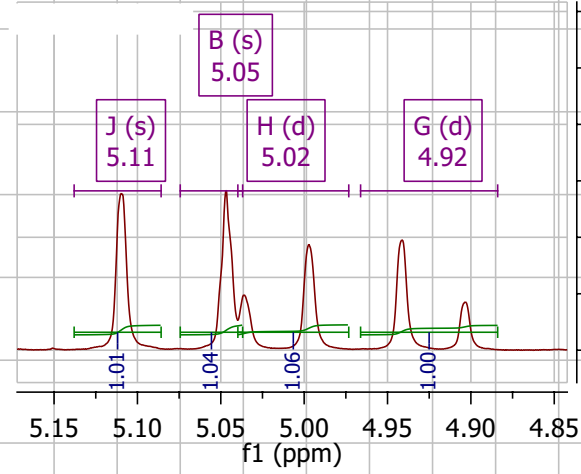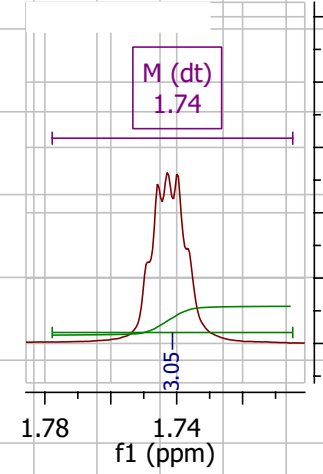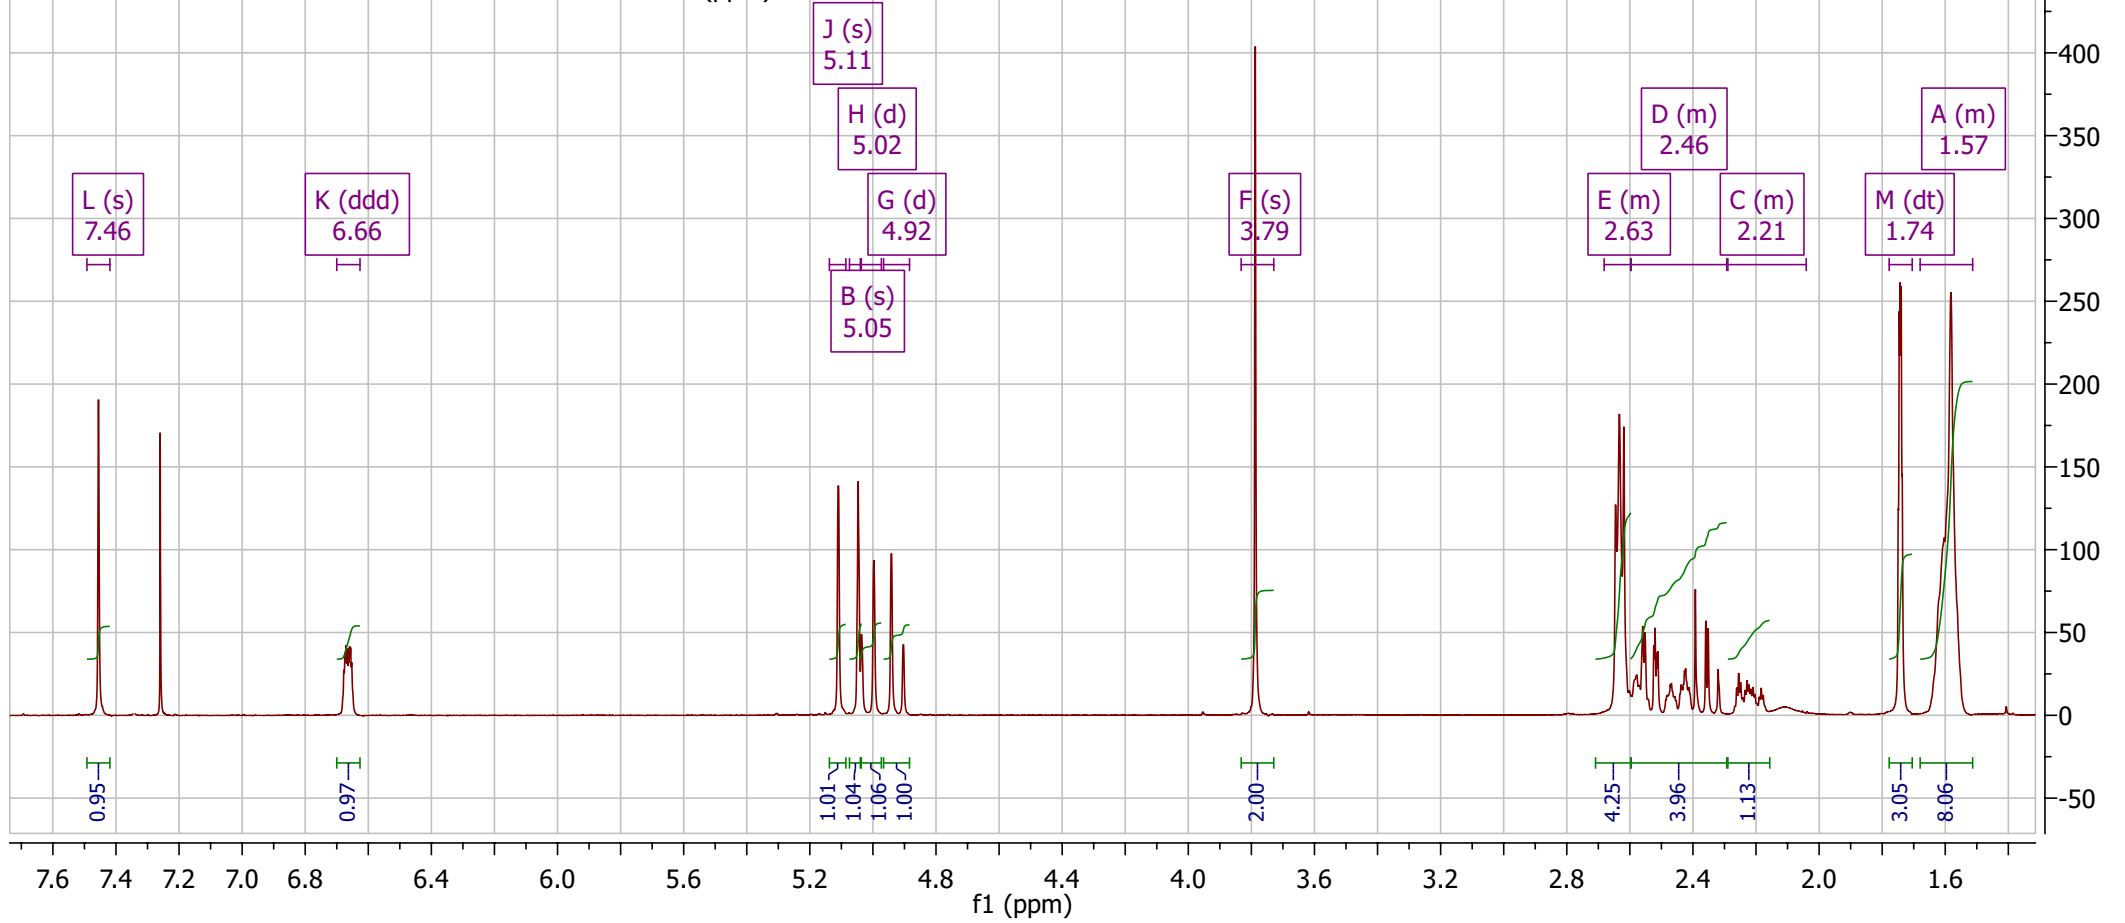

Molecular Formula: C<sub>17</sub>H<sub>20</sub>N<sub>4</sub>O<sub>3</sub>

<sup>13</sup>C NMR (101 MHz, CDCl<sub>3</sub>)

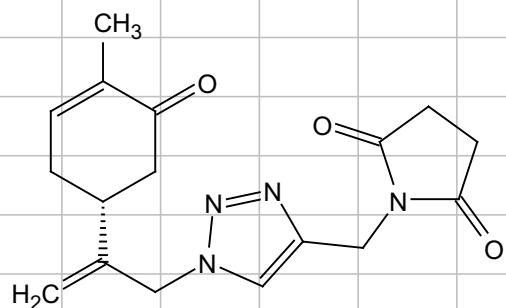

4f

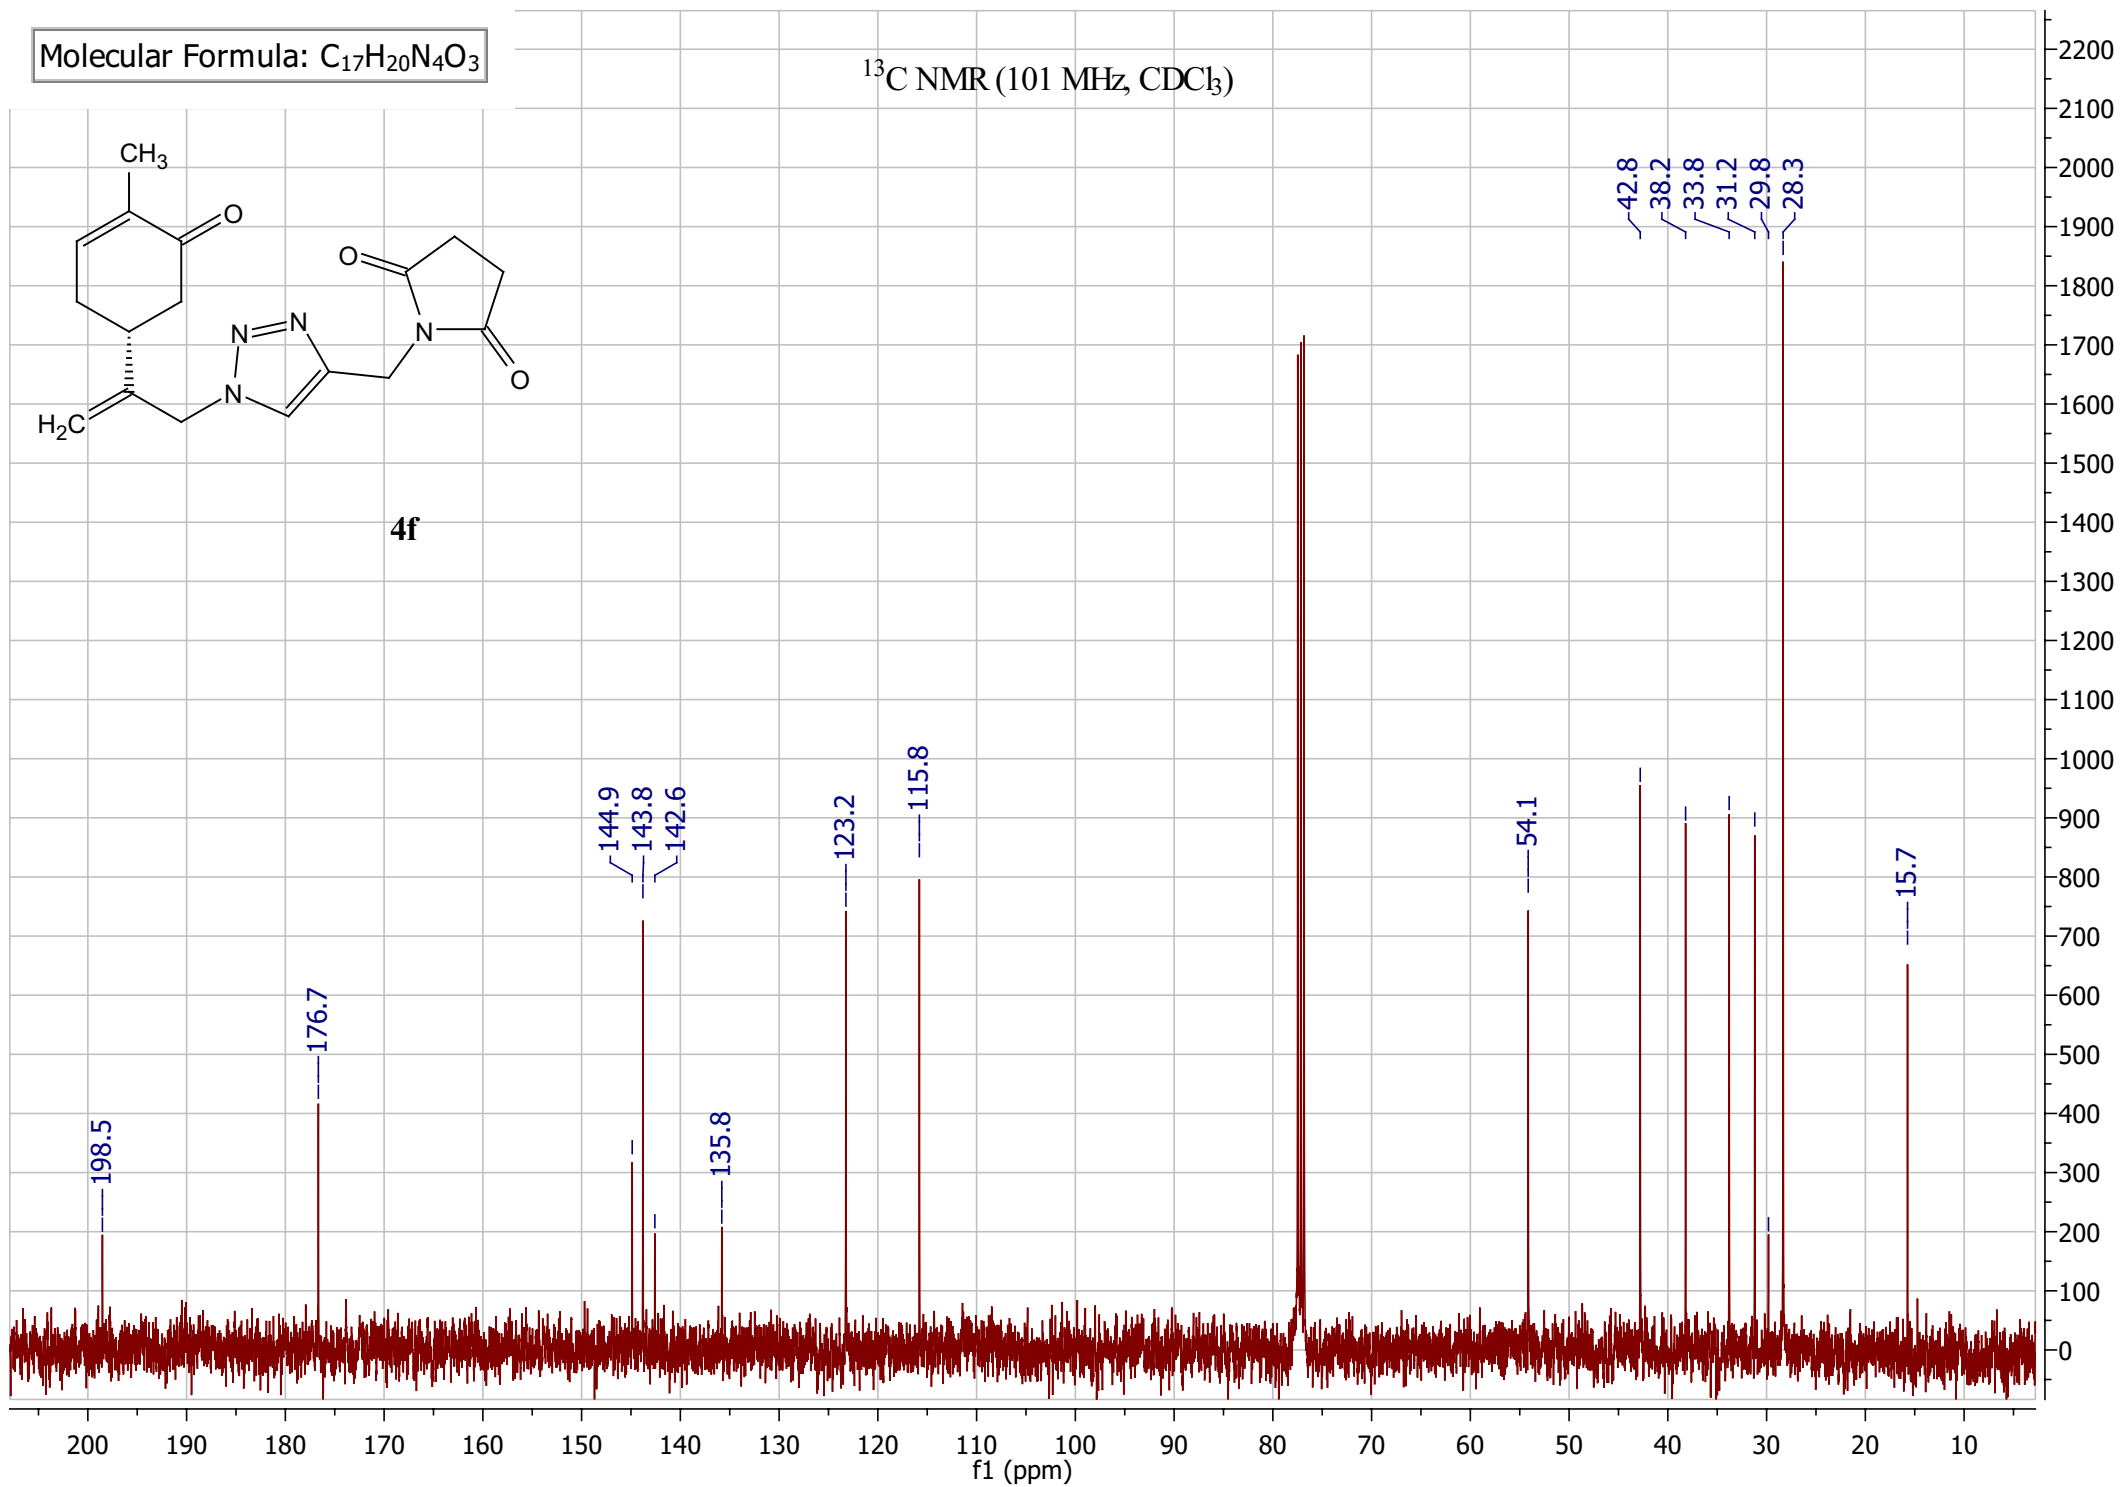

Molecular Formula: C<sub>17</sub>H<sub>20</sub>N<sub>4</sub>O<sub>3</sub>

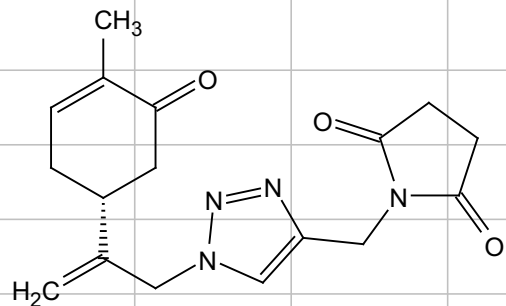

4f

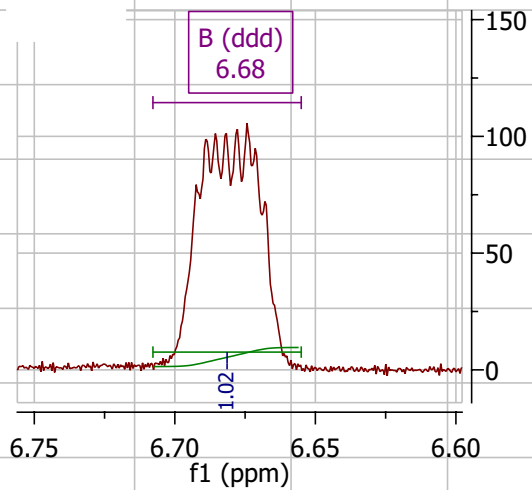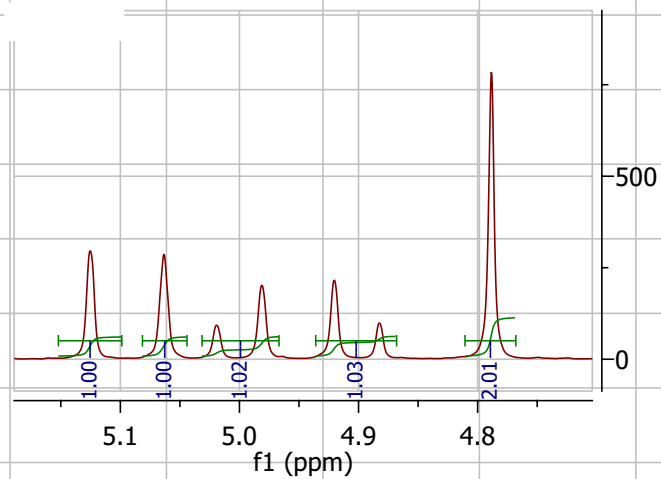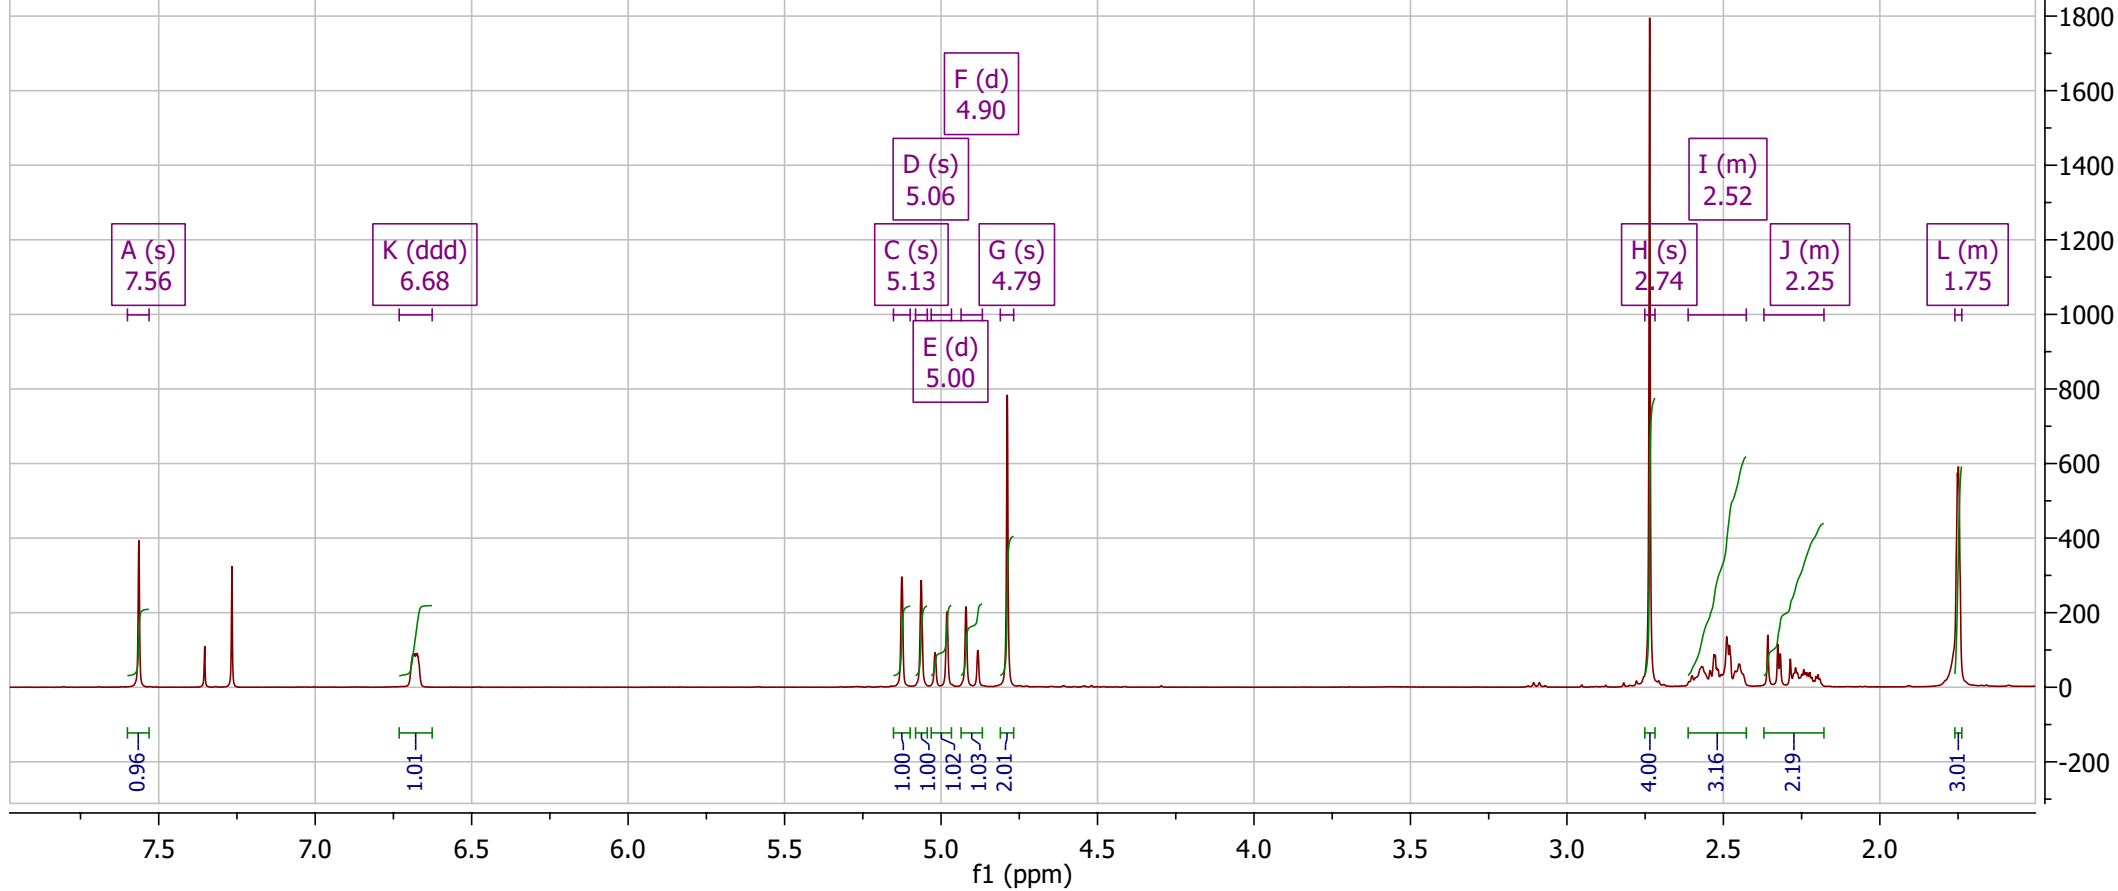

Molecular Formula: C<sub>21</sub>H<sub>20</sub>N<sub>4</sub>O<sub>3</sub>

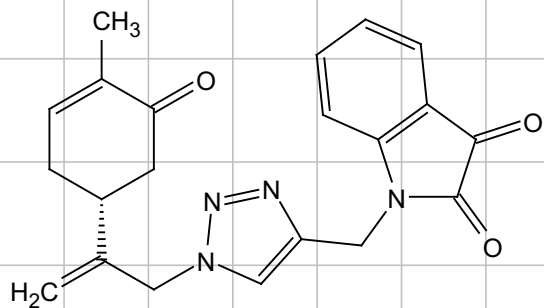

4g

<sup>13</sup>C NMR (101 MHz, CDCl<sub>3</sub>)

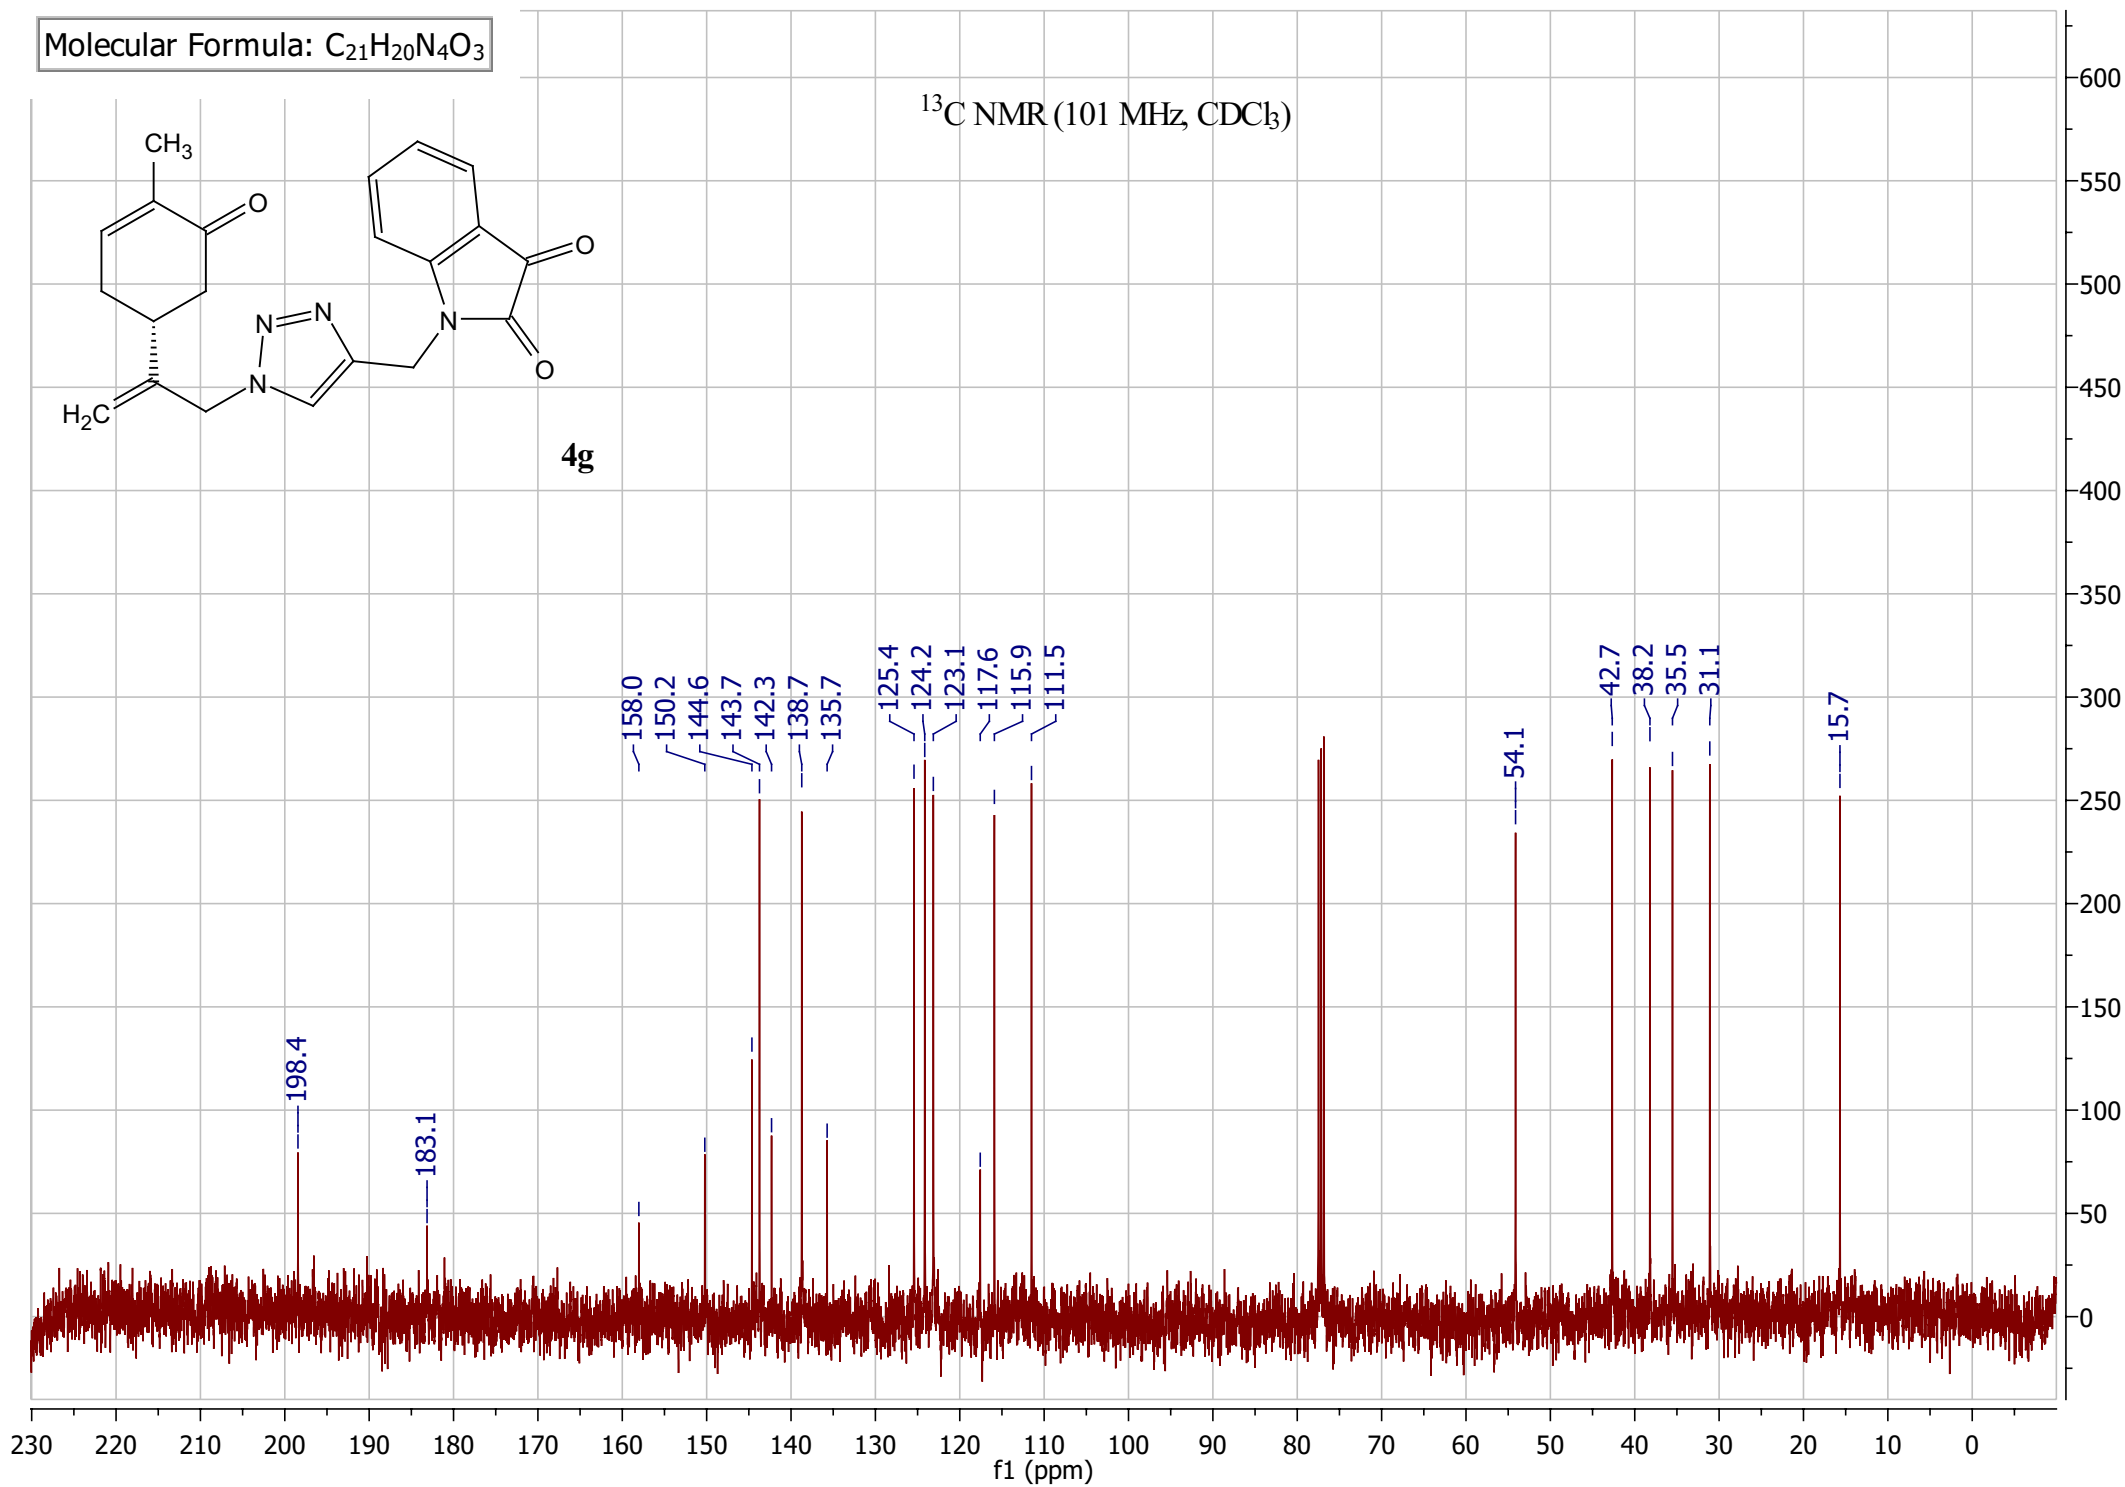

Molecular Formula: C<sub>21</sub>H<sub>20</sub>N<sub>4</sub>O<sub>3</sub>

<sup>1</sup>H NMR (400 MHz, CDCl<sub>3</sub>)

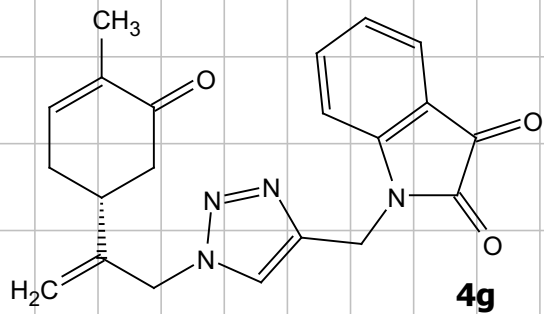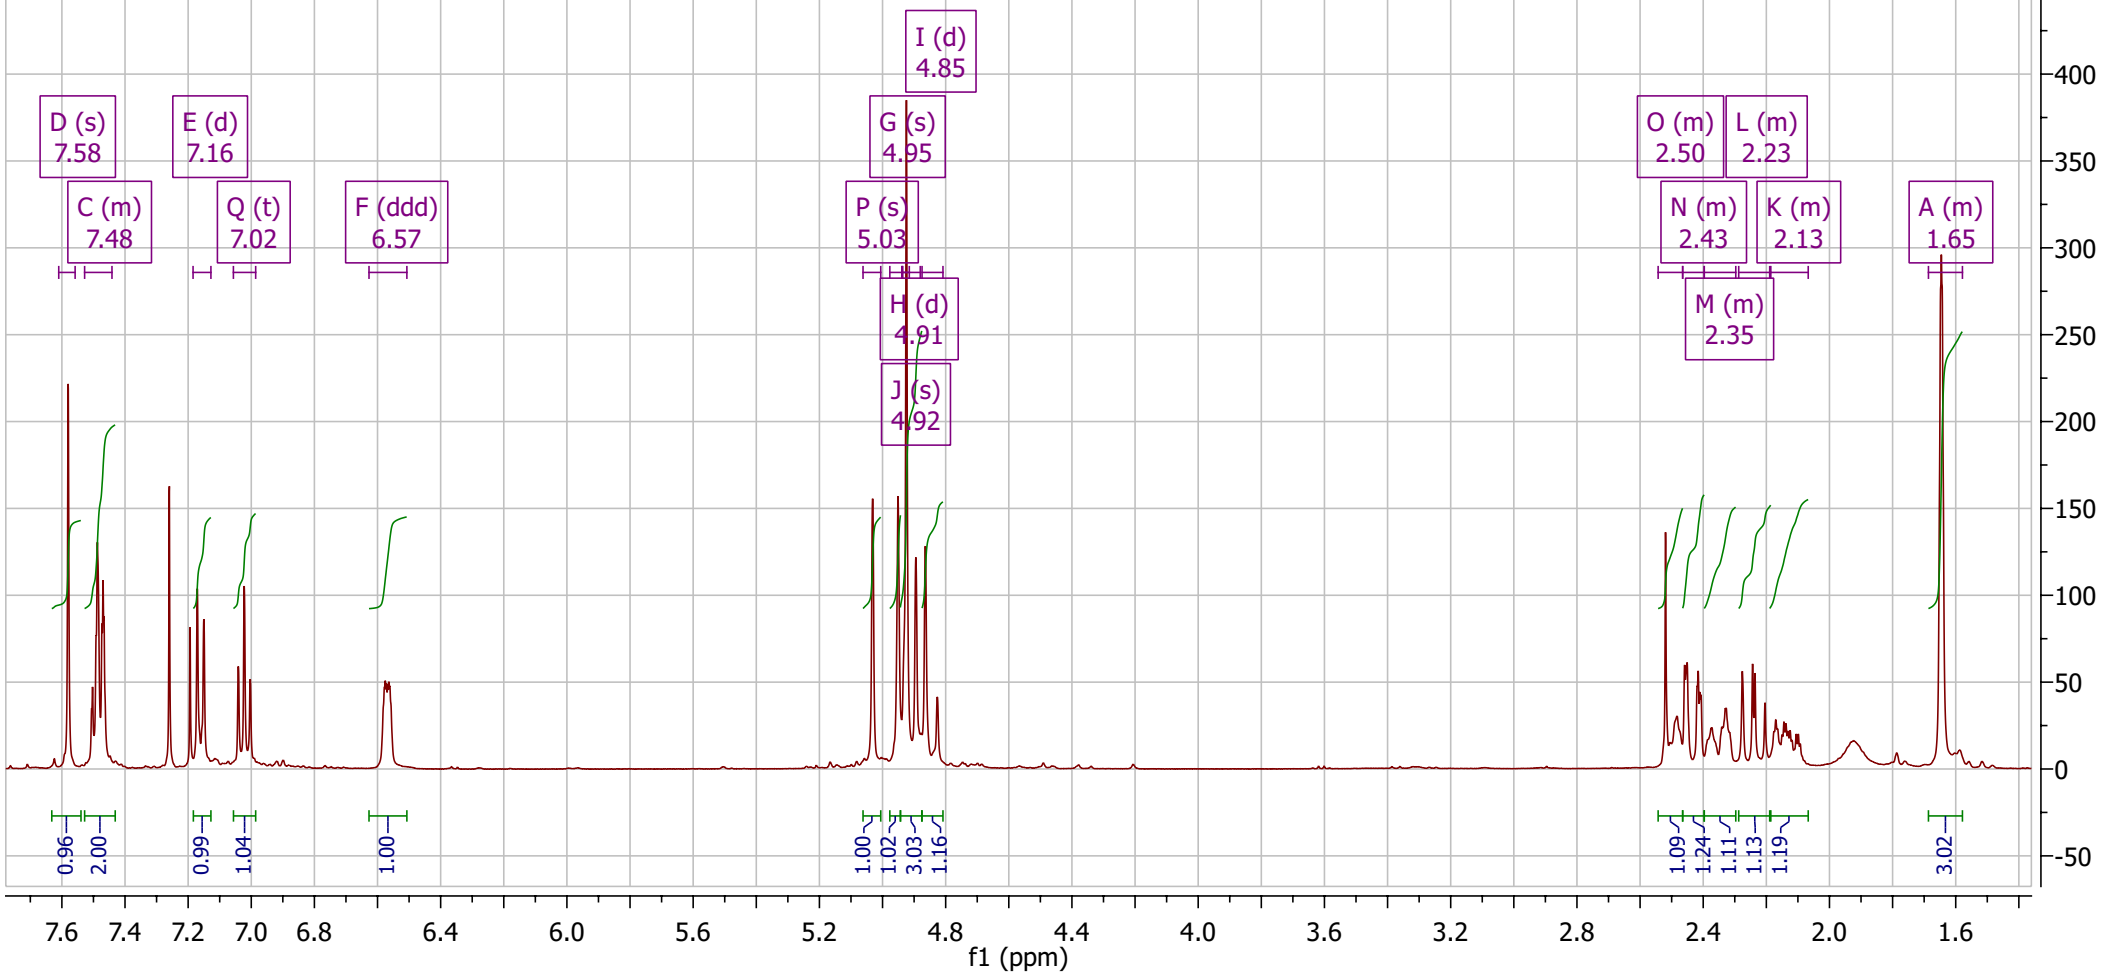

Molecular Formula: C<sub>21</sub>H<sub>20</sub>N<sub>4</sub>O<sub>3</sub>

<sup>13</sup>C NMR (101 MHz, CDCl<sub>3</sub>)

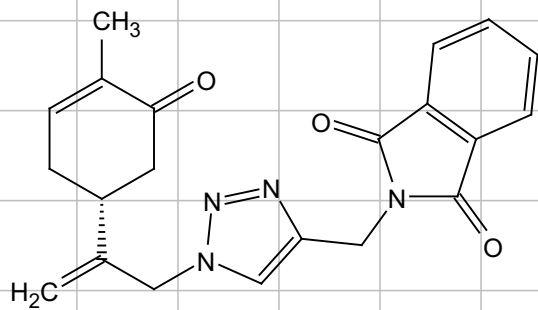

**4h**

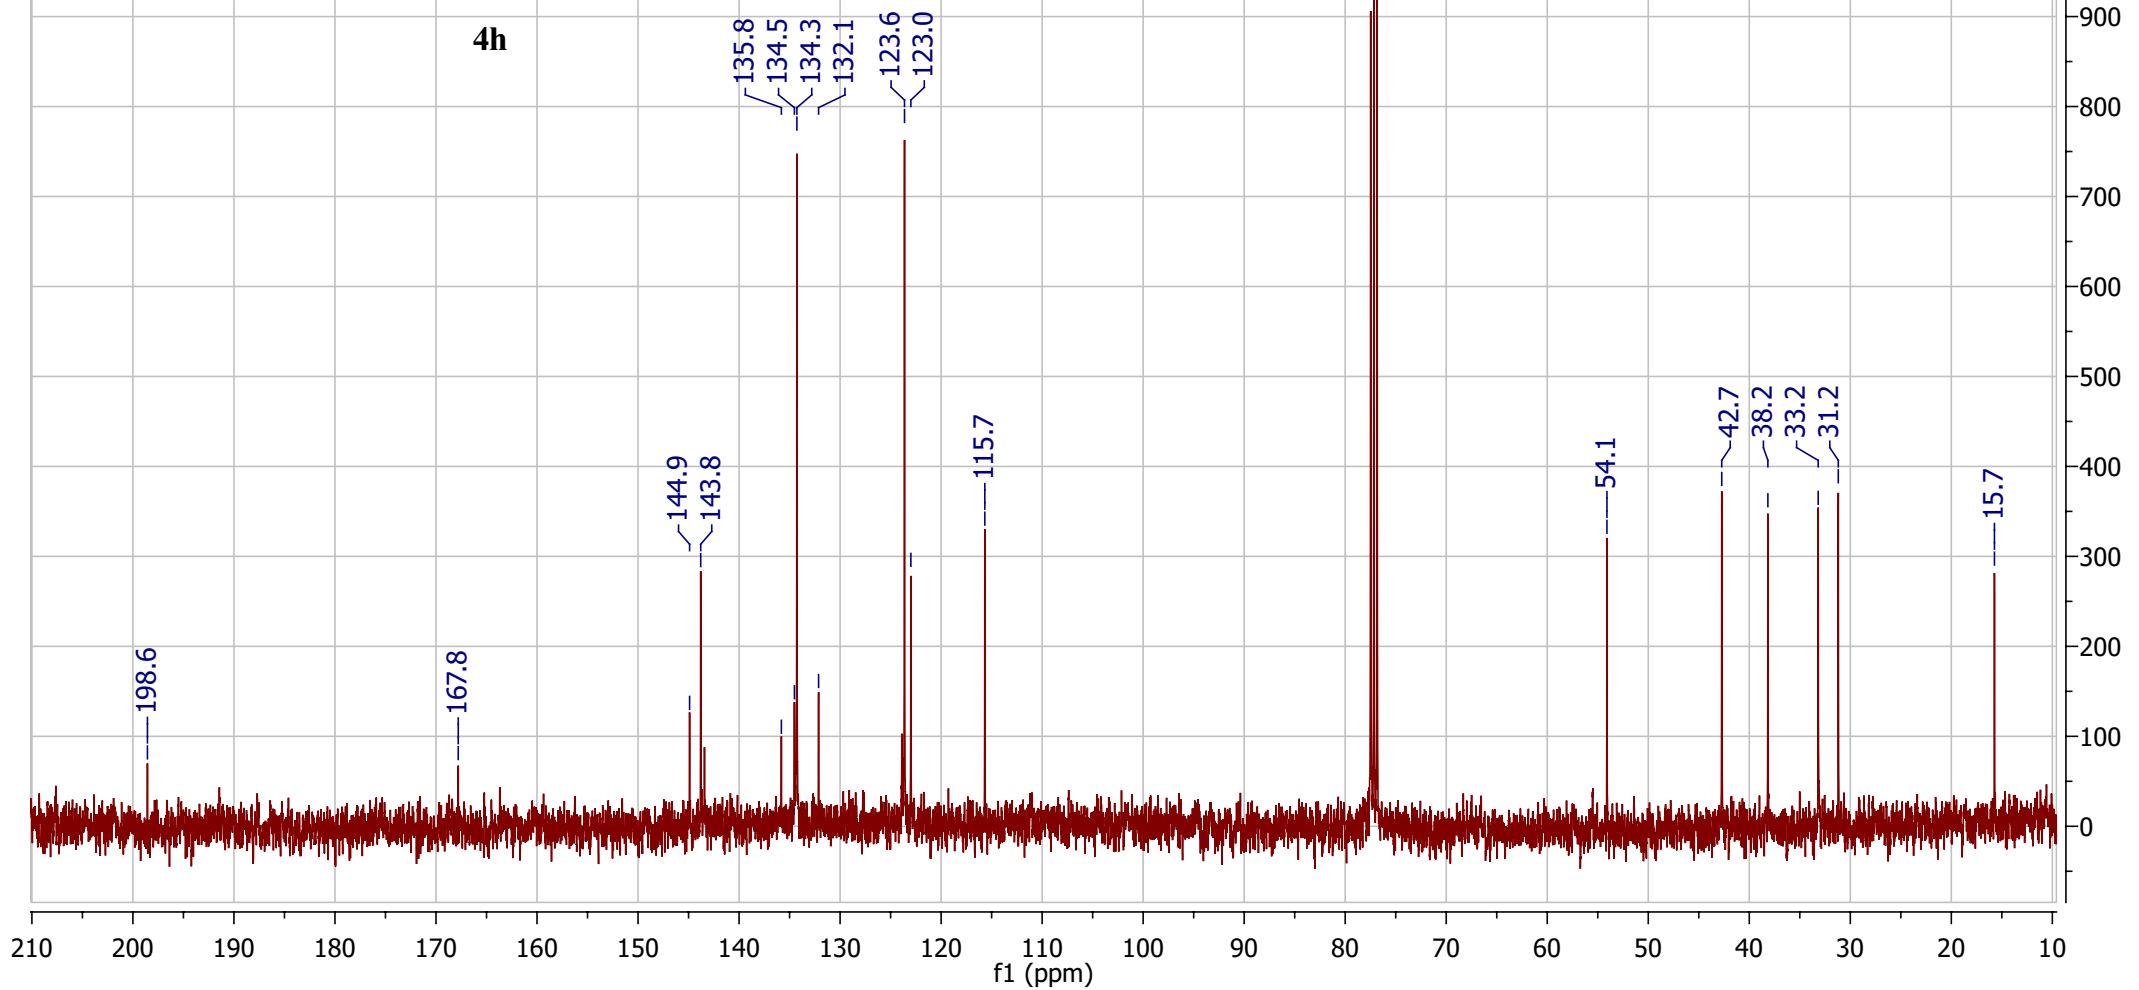

Molecular Formula: C<sub>21</sub>H<sub>20</sub>N<sub>4</sub>O<sub>3</sub>

<sup>1</sup>H NMR (400 MHz, CDCl<sub>3</sub>)

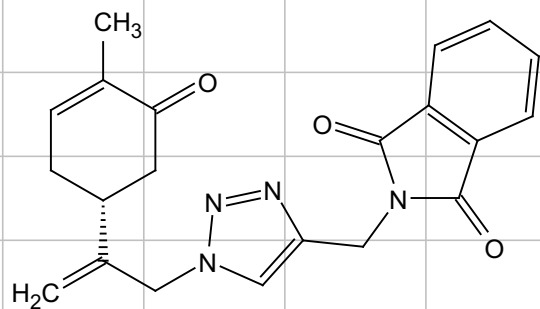

4h

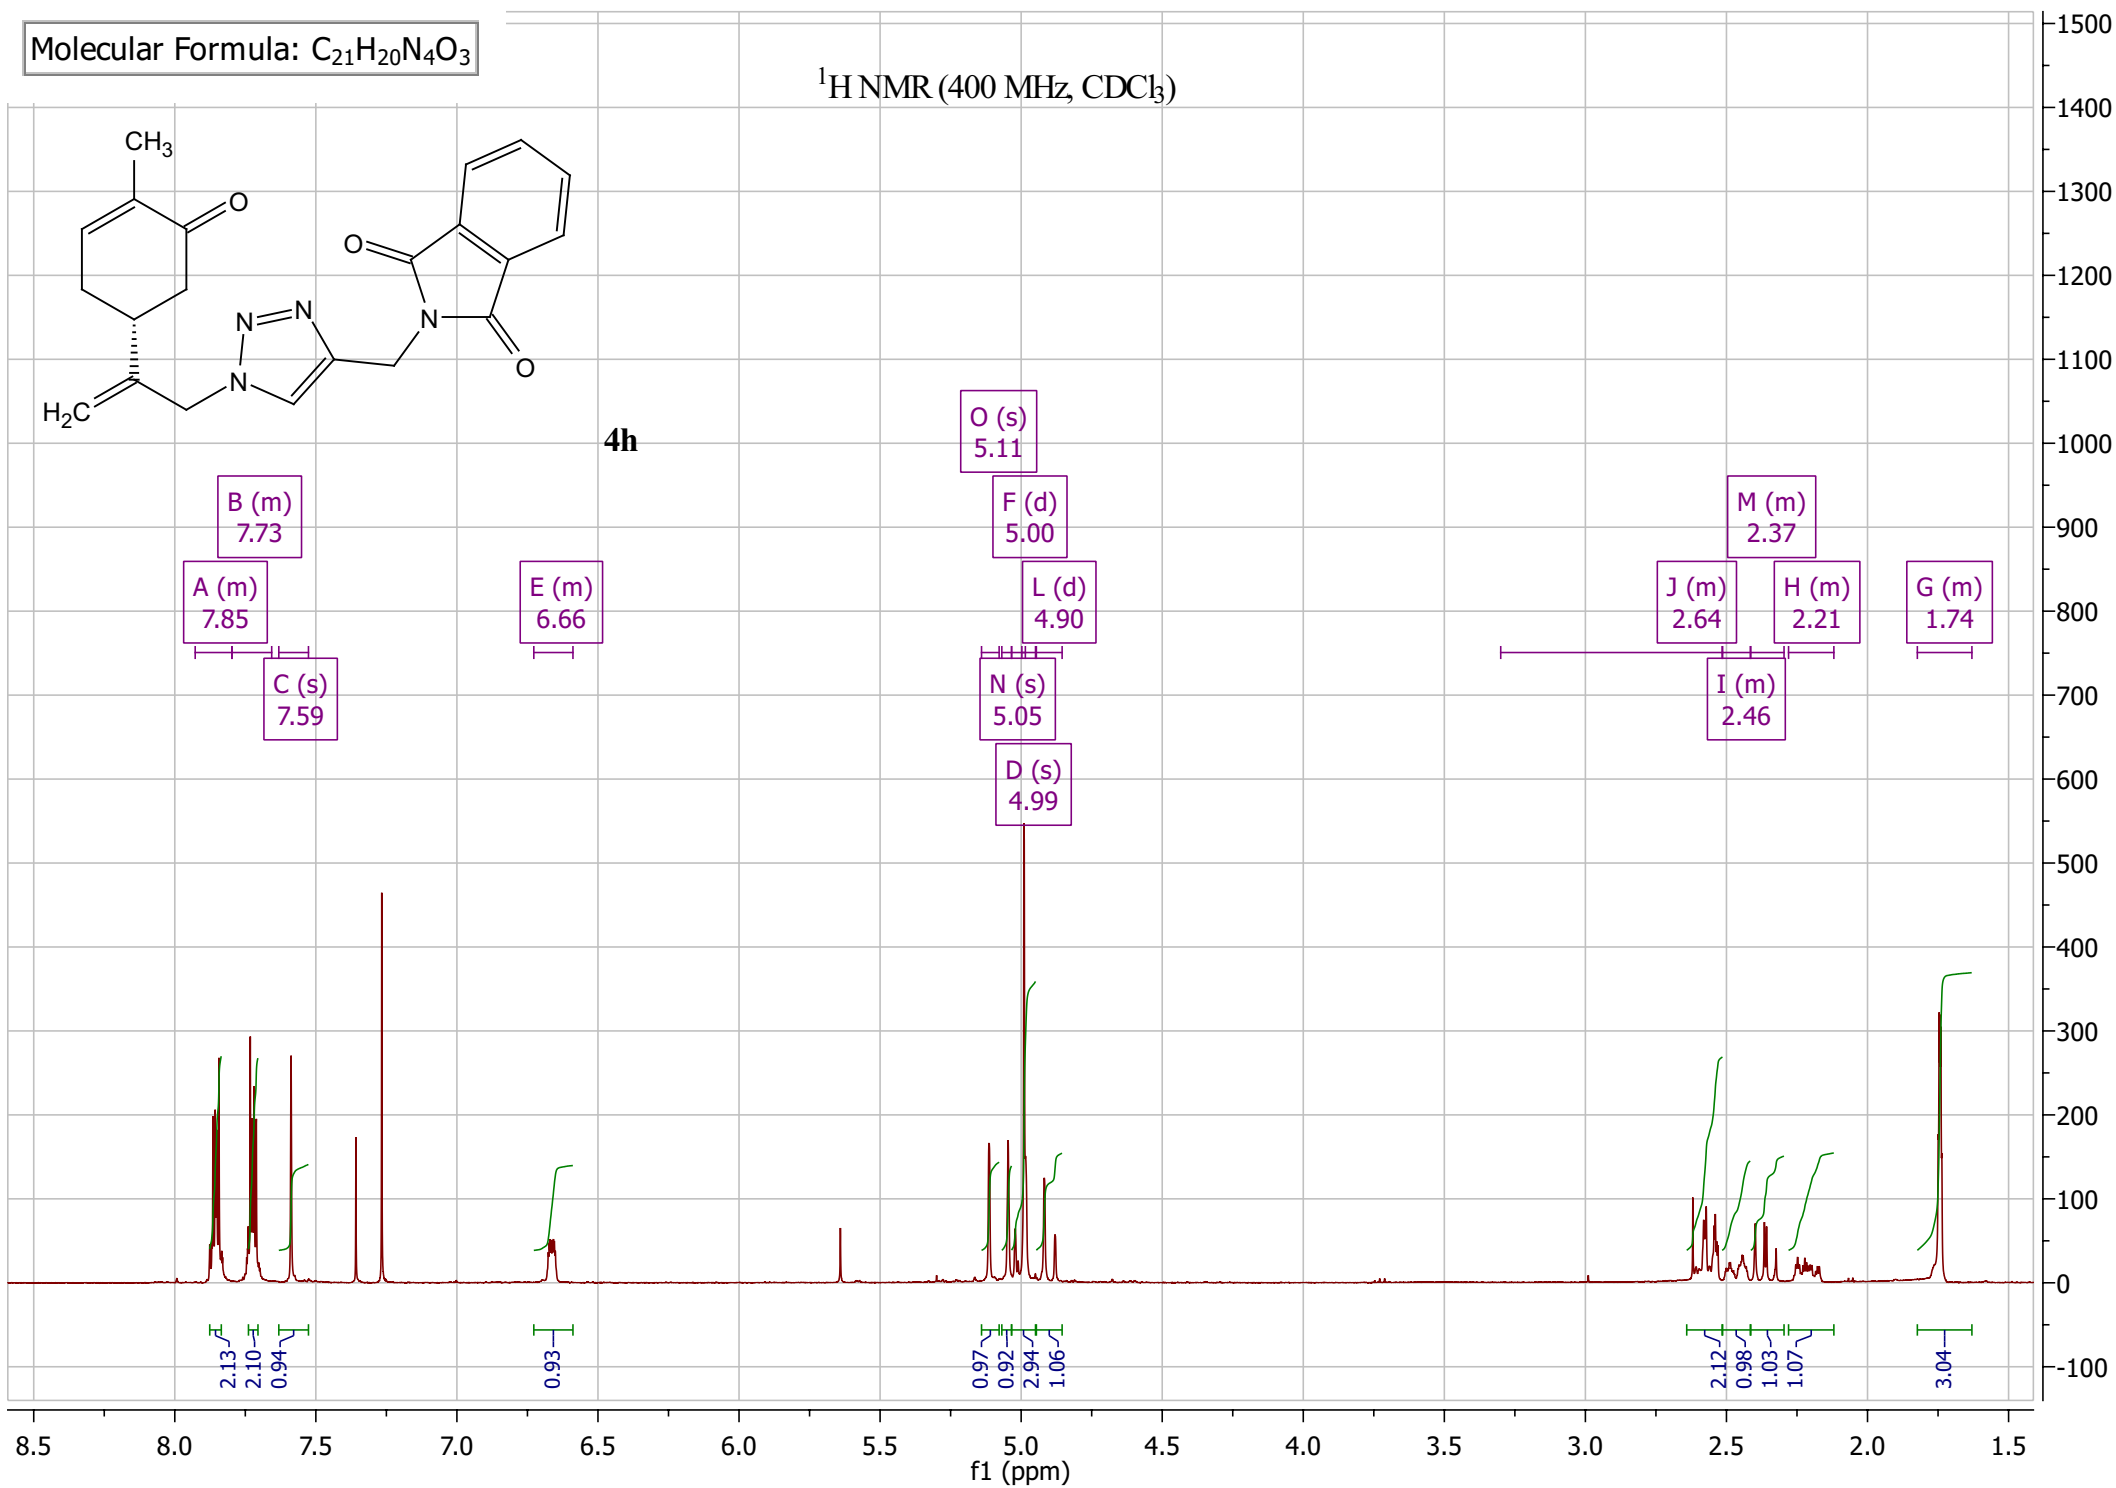



Molecular Formula: C<sub>19</sub>H<sub>20</sub>N<sub>6</sub>O

<sup>13</sup>C NMR (101 MHz, CDCl<sub>3</sub>)

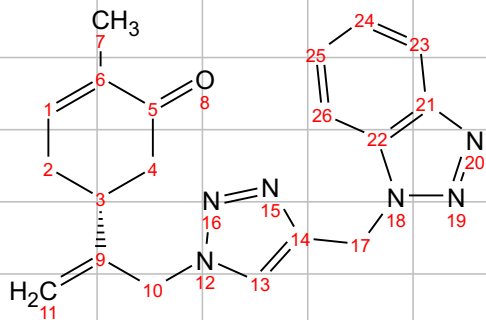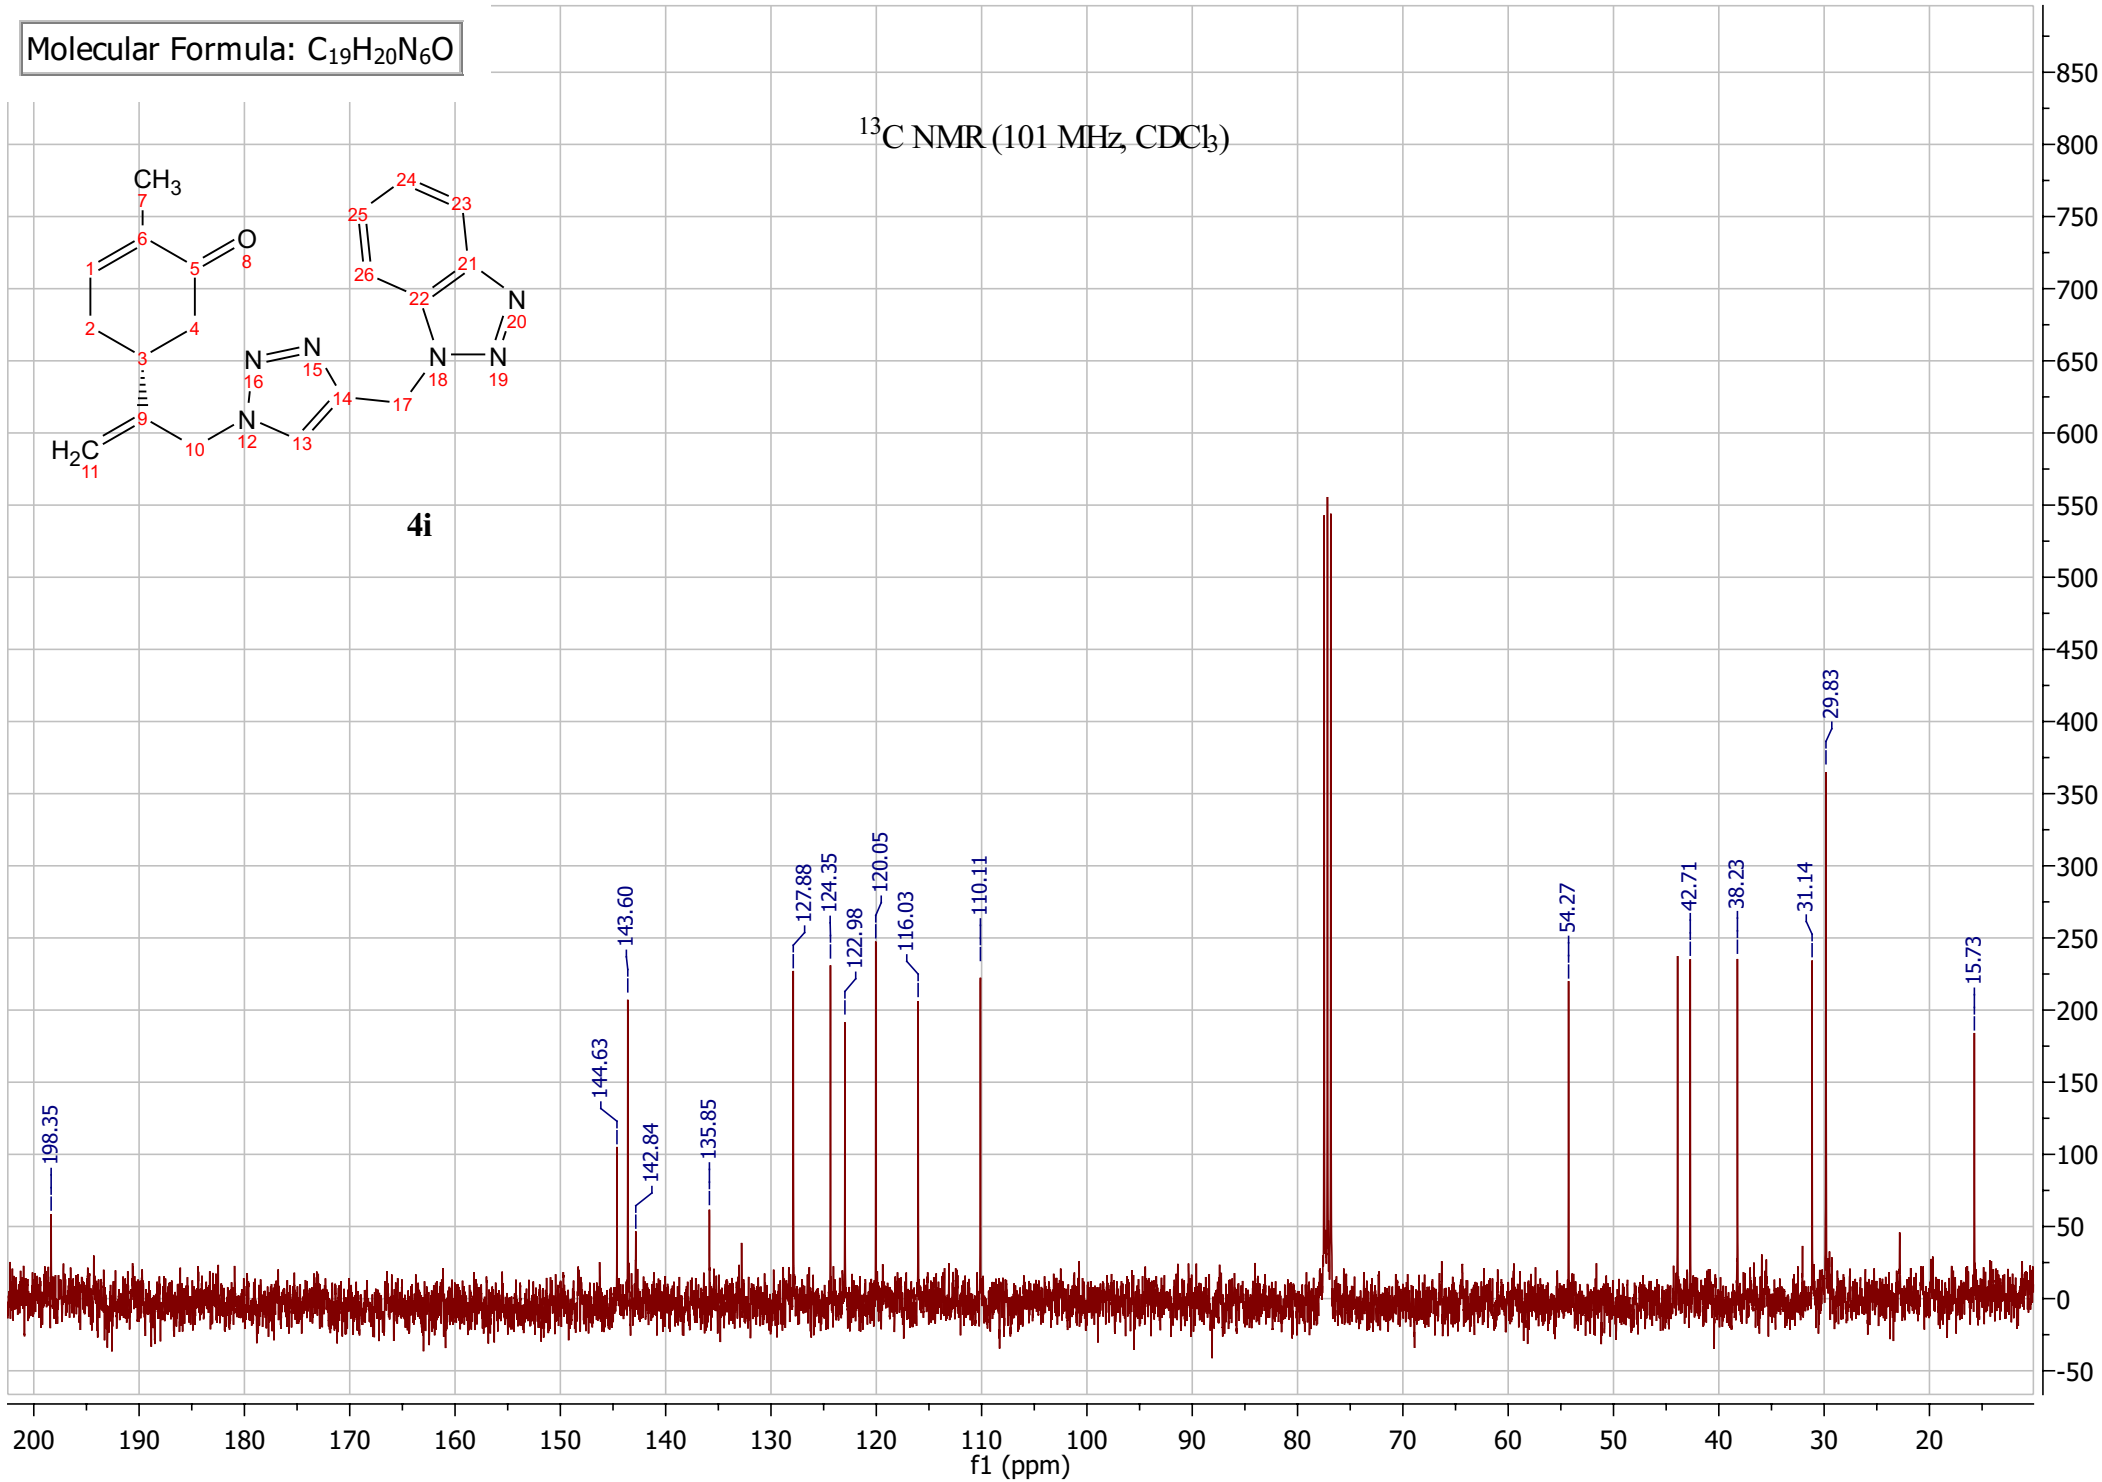

Molecular Formula: C<sub>19</sub>H<sub>20</sub>N<sub>6</sub>O

<sup>1</sup>H NMR (400 MHz, CDCl<sub>3</sub>)

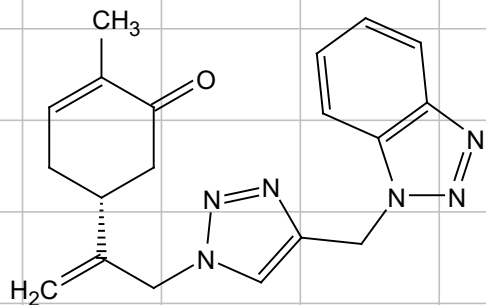

**4i**

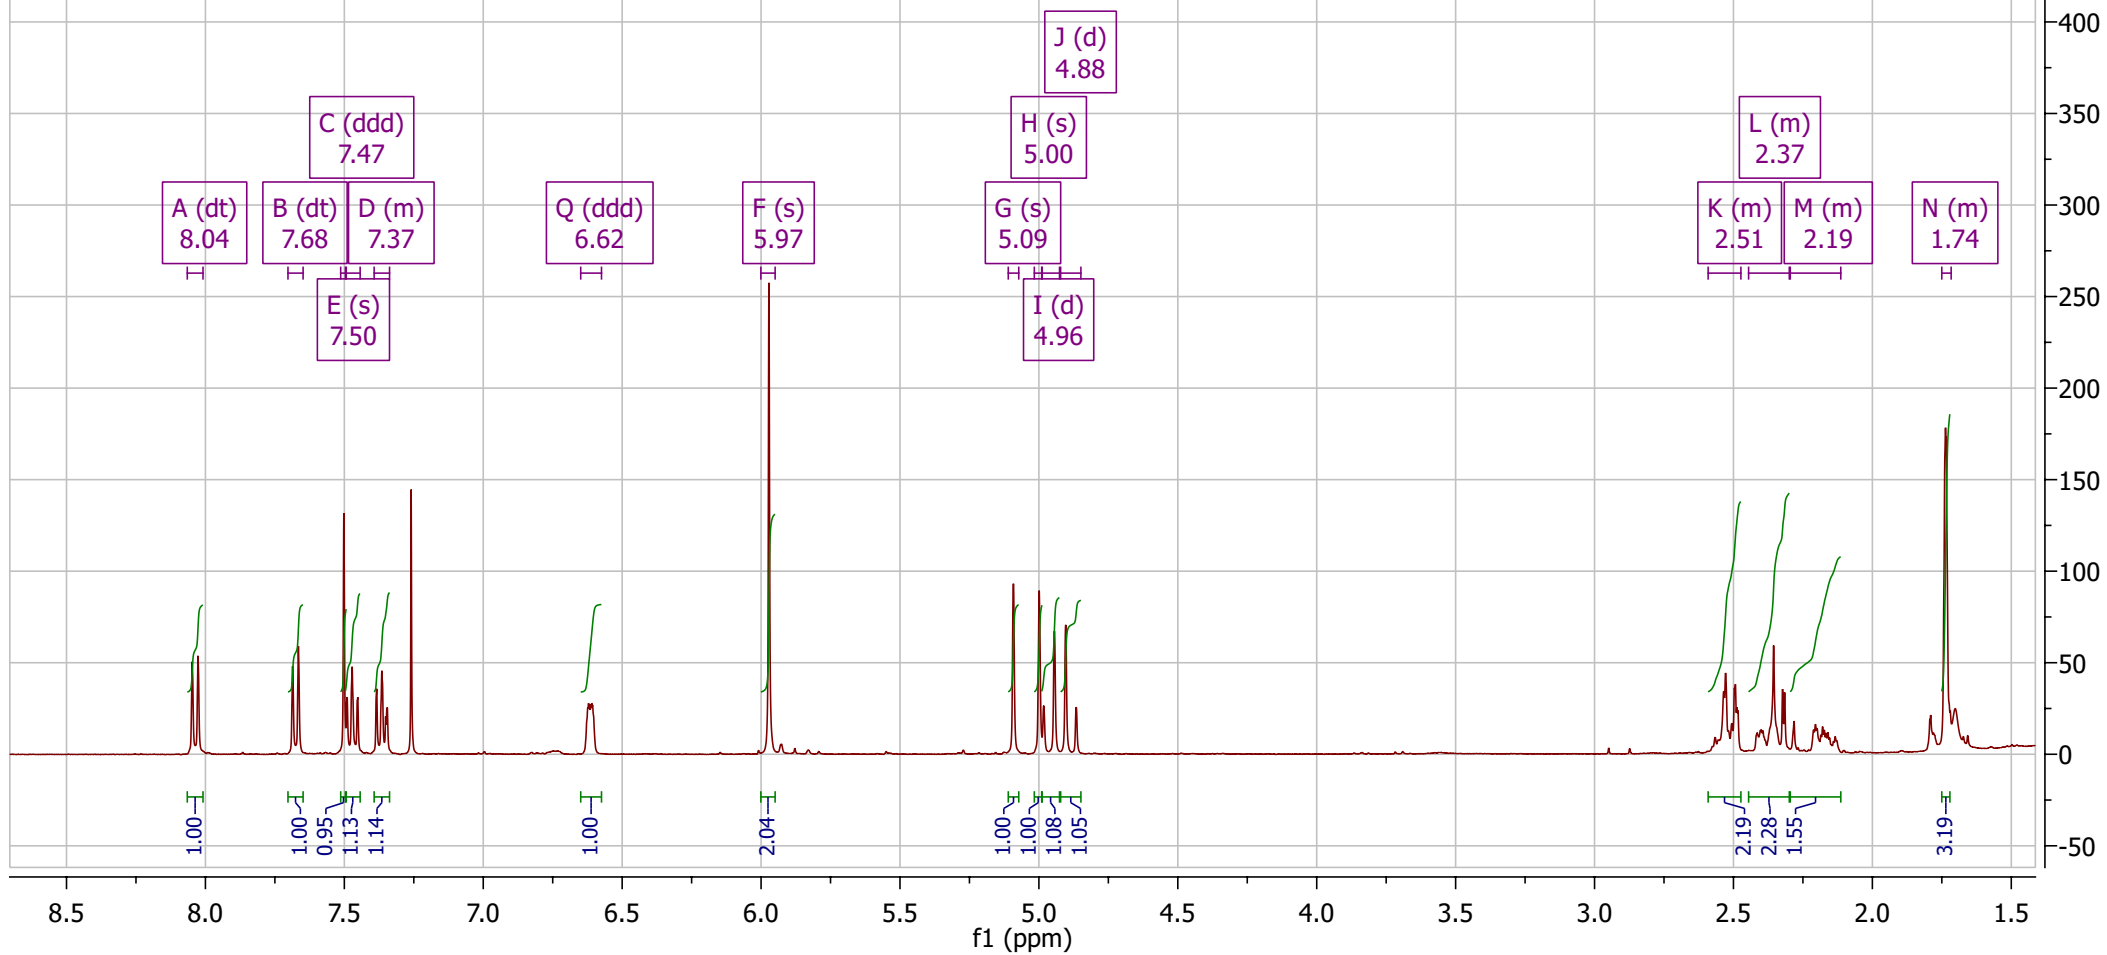

Supplement: molecules-23-02991-s001.pdf [file molecules-23-02991-s001.pdf]
